# Supplementary material for: Uncovering the genetic basis for quality traits in the Mediterranean old wheat germplasm and phenotypic and genomic prediction assessment by cross-validation test
Source: Front Plant Sci. 2023 Jan 27;14:1127357. doi: 10.3389/fpls.2023.1127357 (PMC9911887; doi:10.3389/fpls.2023.1127357)
Supplement: Supplementary file 2 [file Table_2.xlsx]

## Sheet: Supplementary table 1
Supplementary table 1:- MED6WHEAT IRTA panel
Accession	Country	Subpopulation
TRI 1667	Albania	SP2
TRI 2100	Albania	SP2
TRI 1671	Albania	SP2
TRI 1313	Bulgaria	SP2
TRI 7819	Bulgaria	SP2
TRI 7821	Bulgaria	SP2
408-IV/61	Bosnia & Herzegovina	SP2
Moriborska	Bosnia & Herzegovina	SP2
Ranka	Bosnia & Herzegovina	SP2
TRI 10515	Cyprus	Admixed
TRI 10526	Cyprus	SP3
TRI 10561	Cyprus	Admixed
TRI 10590	Cyprus	SP1
TRI 10531	Cyprus	SP3
Ali Ben Makhloul	Algeria	SP3
Khalof	Algeria	SP3
Mahon Demias	Algeria	SP1
MG 17956	Algeria	SP3
MG 17999	Algeria	SP2
MG 18006	Algeria	SP2
MG 18013	Algeria	SP1
MG 18036	Algeria	SP1
MG 18049	Algeria	SP1
Bahatane	Algeria	SP3
Krelof - A	Algeria	SP2
Ble' du dahra-baal	Algeria	SP1
Mahon 7295	Algeria	SP1
Sachah	Egypt	SP2
Gibson	Egypt	SP3
Hauch	Egypt	SP3
Hindiffino crible	Egypt	Admixed
Hindiffino non crible	Egypt	SP3
Mokhtar	Egypt	SP1
Hindi 62	Egypt	SP3
Bladette de Besplas	France	SP2
Ble Blanc de la Reole	France	SP2
Mars Rouge Sans Barbe	France	SP2
Touzelle Belle Abec	France	SP1
Touzelle Blanche Barbu	France	SP2
Touzelle Originario	France	Admixed
Touzelle Rouge de Provence	France	Admixed
Bladette de puylaurens	France	SP2
Mouton a epi rouge	France	SP2
Saisette	France	Admixed
TRI 14046	France	SP2
TRI 17938	France	SP2
TRI 1425	Greece	SP2
TRI 1686	Greece	SP1
TRI 17989	Greece	Admixed
TRI 2060	Greece	SP1
TRI 2071	Greece	Admixed
TRI 2129	Greece	SP2
986	Croatia	SP2
Croatia 3	Croatia	SP2
Croatia 6	Croatia	SP2
Umarah	Iraq	SP1
TRI 15277	Iraq	SP3
TRI 15292	Iraq	SP3
TRI 16079	Iraq	SP3
TRI 16084	Iraq	SP2
TRI 11548	Iraq	SP3
TRI 16080	Iraq	SP3
TRI 11528	Iraq	SP3
TRI 16063	Iraq	SP3
TRI 8358	Iraq	SP3
CGN06182	Israel	SP1
CGN06204	Israel	SP1
CGN04191	Israel	Admixed
Palestinskaya	Israel	Admixed
17310	Israel	SP1
Cappellina	Italy	SP2
TRI 15321	Italy	SP1
TRI 14055	Italy	SP2
TRI 15226	Italy	Admixed
TRI 16900	Italy	SP2
TRI 16895	Italy	SP3
TRI 14842	Italy	SP1
Solina	Italy	SP2
TRI 15219	Italy	Admixed
TRI 14173	Italy	SP2
TRI 16516	Italy	SP2
Cappelli	Italy	SP1
25	Jordan	SP3
Dorziyeh Karak - B	Jordan	SP3
SY 271	Jordan	Admixed
17411	Jordan	SP1
Beyrouth 11	Lebanon	SP3
Beyrouth 3	Lebanon	SP2
Salamouni	Lebanon	SP3
TRI 17974	Libya	Admixed
TRI 14643	Libya	SP3
TRI 14668	Libya	SP3
Canivano	Morocco	SP1
Fez 2	Morocco	SP1
Recio	Morocco	SP1
CGN04157 - A	Morocco	Admixed
CGN04158	Morocco	SP1
CGN06246	Morocco	SP1
CGN06247	Morocco	SP1
CGN06248	Morocco	SP1
CGN06252	Morocco	SP1
CGN06255	Morocco	SP1
CGN06260	Morocco	Admixed
CGN06264	Morocco	SP1
CGN06266	Morocco	Admixed
CGN06269	Morocco	SP1
CGN06271	Morocco	Admixed
CGN06284	Morocco	Admixed
CGN06297	Morocco	SP1
TRI 18287	Morocco	SP1
TRI 18291	Morocco	SP1
TRI 18308	Morocco	SP1
309-VII/33	Makedonia	SP2
340-VII/45	Makedonia	SP2
VII/1-B	Makedonia	SP2
Stara bela	Makedonia	SP2
Magueija	Portugal	SP2
Santareno	Portugal	SP2
Temporao de coruche	Portugal	SP2
Tremes branco	Portugal	SP1
Bistra	Romania	SP2
Pades	Romania	SP2
Solonetu nou	Romania	SP2
SVGB10195	Romania	SP2
Raton de Belalcazar	Spain	SP1
Cabezorro	Spain	SP1
Negrete de Cañaveras	Spain	SP2
Pelon blanco	Spain	Admixed
Chamorro de Villadiego	Spain	SP2
Blat petit de Olot	Spain	SP1
Candeal	Spain	SP2
Isla de Fuerteventura	Spain	SP2
Hembrilla de Jerga	Spain	SP2
Extremo Sur Argelino	Spain	SP2
Xeixa Tarragona	Spain	SP1
41-II/4-B	Serbia	SP2
Crvenica	Serbia	SP2
Piskulja	Serbia	SP2
Legan bez osja	Serbia	SP2
401	Syria	SP1
Aleppo 21	Syria	Admixed
Aleppo 28	Syria	SP3
Aleppo 32	Syria	SP3
Aleppo 33	Syria	SP3
Damaskus 12	Syria	SP3
Damaskus 8	Syria	SP1
K1140	Syria	Admixed
Kaundouhari	Syria	SP3
TRI 8375	Syria	SP1
Salamuni - A	Syria	Admixed
Allorca	Tunisia	SP2
Sbei noir	Tunisia	SP1
TRI 17006	Tunisia	SP3
TRI 17002	Tunisia	Admixed
Florence 193	Tunisia	SP2
763	Turkey	Admixed
1170	Turkey	Admixed
811 (B)	Turkey	SP3
1552	Turkey	SP2
2103	Turkey	SP3
2933	Turkey	SP3
2936	Turkey	SP3
Edirne	Turkey	SP3
Gemir - B	Turkey	SP3
Kirmizi kiluk - A	Turkey	SP3
Ormece	Turkey	SP3
Saribasak	Turkey	SP3
T-317	Turkey	SP2
Yazlik	Turkey	SP3
Yumusak	Turkey	SP3

## Sheet: Supplementary table 2
Supplementary table 2. Genetic correlations by subpopulations
SP1
Traits	GY	TW	TKW	GH	FY	GP	FP	FS	MT	P	W	P/L	LV	D
TW	-0.130652
TKW	0.941738	-0.328952
GH	-0.393661	0.20588	-0.178174
FY	-0.104651	-0.0192853	0.566088	0.647959
GP	-0.568714	-0.133883	-0.0525344	-0.201242	0.184595
FP	-0.658598	-0.157845	-0.0795264	-0.153441	0.22206	0.9999
FS	-0.313678	-0.0678929	0.00556963	-0.244617	-0.0208256	0.28235	0.359349
MT	-0.0518759	0.109558	-0.711225	0.309196	-0.205025	-0.692607	-0.651656	0.323322
P	-0.148711	0.0317904	-0.529232	0.326318	-0.120106	-0.549743	-0.51575	0.394662	0.974048
W	-0.57802	-0.00615048	-0.81323	0.737805	0.136991	-0.197164	-0.240181	0.356849	0.912134	0.9999
P/L	-0.122658	0.27377	-0.320411	0.68756	-0.144416	-0.18549	-0.284745	-0.575615	0.146207	0.142399	0.167464
LV	-0.239788	-0.139285	0.69367	-0.185678	-0.124277	-0.12429	-0.0896496	0.9999	0.705011	0.735724	0.475864	-0.973741
GFD	0.240011	-0.0128646	0.347077	0.438717	0.151275	-0.896595	-0.843724	-0.582588	0.717678	0.56617	0.135614	0.334417	-0.0337557
GFR	0.166376	-0.260065	0.319423	-0.568213	0.0811556	0.906399	0.836184	0.622382	-0.9999	-0.817039	-0.539058	-0.50385	0.558039	-0.790009
SP2
Traits	GY	TW	TKW	GH	FY	GP	FP	FS	MT	P	W	P/L	LV	D
TW	-0.0155184
TKW	0.0864762	-0.101594
GH	-0.0676357	0.542506	-0.491998
FY	0.31937	0.255896	0.185846	0.268683
GP	-0.880054	0.213634	-0.194353	0.109656	-0.455468
FP	-0.873108	0.107563	-0.0754886	0.0521646	-0.438638	0.998801
FS	-0.0476834	-0.00917439	-0.320299	0.271813	-0.0753136	0.26821	0.258054
MT	0.433906	0.275539	-0.0712322	0.261206	0.221282	-0.431134	-0.427491	0.702674
P	0.262928	0.272074	-0.11625	0.352521	0.141083	-0.260573	-0.269279	0.775192	0.979387
W	0.31533	-0.00863408	-0.351472	0.549143	0.197951	-0.145589	-0.172369	0.74782	0.9999	0.9999
P/L	0.179387	0.286548	-0.260778	0.611291	0.0102849	-0.0941761	-0.167409	0.010547	0.430832	0.417002	0.509811
LV	0.187347	-0.165079	-0.372291	0.297788	0.171629	-0.0602872	-0.0407044	0.789748	0.744501	0.770734	0.682887	-0.29304
GFD	0.677625	-0.190944	0.434346	-0.392531	0.292288	-0.691127	-0.635022	-0.284654	0.0215902	-0.0800273	-0.0275875	0.072218	-0.0531812
GFR	-0.695977	0.16306	0.232022	0.0123245	-0.170565	0.624797	0.650292	0.0914215	-0.0764266	-0.0084607	-0.242572	-0.259031	-0.228656	-0.781658
SP3
Traits	GY	TW	TKW	GH	FY	GP	FP	FS	MT	P	W	P/L	LV	D
TW	0.446523
TKW	0.9999	0.0666367
GH	-0.338206	-0.19864	-0.693018
FY	-0.62044	-0.253207	-0.163168	0.329744
GP	-0.406208	-0.0234391	-0.700442	0.816567	0.0990079
FP	-0.506464	-0.101782	-0.793263	0.730098	0.0817299	0.9999
FS	-0.857633	-0.145252	-0.709235	0.267097	-0.183186	0.602346	0.621496
MT	-0.285352	0.414731	-0.291553	0.340371	-0.125722	-0.231343	-0.0846397	0.648254
P	-0.326927	0.454911	-0.353579	0.535628	-0.149681	0.138964	0.345017	0.900459	0.963812
W	-0.324483	-0.0847566	-0.462205	0.555874	-0.134439	0.374537	0.404785	0.810064	0.799823	0.940946
P/L	0.9999	0.0453206	0.0230277	0.809403	-0.175529	0.0478346	0.0753734	0.0538509	0.578623	0.567134	0.49272
LV	-0.508728	0.0801513	-0.415512	-0.0125468	-0.0709829	-0.0903826	-0.0758015	0.800769	0.73861	0.823788	0.8181	0.0228849
GFD	0.403654	0.476038	0.257563	0.080601	-0.194817	-0.0689676	-0.129914	-0.242791	-0.132611	-0.0875905	-0.203156	0.114193	-0.291673
GFR	0.780789	-0.356582	0.456032	-0.421495	0.0816774	-0.364769	-0.36693	-0.203299	0.139591	-0.0167665	-0.0498813	0.0155947	0.048564	-0.748779

## Sheet: Supplementary table 3
Supplementary Table 2: List of Marker trait Associations
QTL Hotspot	CI	Trait	Marker	Chr	Genetic Position	Phy Pos v1.0	Phy Pos v2.1	sig	Eff	Allele	r2
QTL_1A.1	24-25-26	GFR	wsnp_Ex_c2868_5293485	1A	25.34	7184721	8532547	3.72659	0.121137	A/G	8.86297
QTL_1A.1		GFR	Kukri_rep_c102231_265	1A	25.34	7181831	8529657	3.05314	0.110105	C/T	6.80946
QTL_1A.2	68-70-72	FY	wsnp_Ra_rep_c105422_89367749	1A	70.1	223938086	225874182	3.07703	1.85062	A/G	7.86805
QTL_1A.2		FY	Excalibur_c44731_1000	1A	70.1	N/A	N/A	3.00559	-1.61033	C/T	7.27181
QTL_1A.2		FY	IAAV5756	1A	70.1	182069350	184191811	3.07091	-1.85728	G/T	7.75121
QTL_1A.2		FY	wsnp_Ex_rep_c67763_66441222	1A	70.1	N/A	N/A	3.325	-1.93268	A/G	8.44971
QTL_1A.2		FY	wsnp_Ex_c28165_37310070	1A	70.1	131964616	134070669	3.27658	-1.95537	C/T	8.16943
QTL_1A.2		P	GENE-0431_601	1A	70.1	N/A	N/A	3.47836	17.3995	C/T	9.2327
QTL_1A.2		GFR	Kukri_c47825_138	1A	71.48	363423999	365149799	3.0243	0.14644	A/G	6.66405
QTL_1A.3	78-79	FY	BS00021714_51	1A	78.33	490087845	491642228	3.28147	1.37614	C/T	8.58143
QTL_1A.4	84-87-89	FS	TA003063-0097	1A	84.56	508151462	509648217	4.34284	-1.45733	C/T	10.7671
QTL_1A.4		FY	Ra_c64515_242	1A	87.46	513893962	515396136	3.77513	1.55948	A/C	9.70136
QTL_1A.4		FY	Ku_c10813_1122	1A	87.46	513891668	515393842	3.13806	1.36203	C/T	7.80715
QTL_1A.5	95-96	GH	Kukri_c67383_102	1A	95.2	530204052	531867984	3.24164	-11.1265	C/T	7.34493
QTL_1B.1	9-10	LV	Kukri_c37738_417	1B	9.68	4095875	5080392	3.00887	38.0615	C/T	8.06025
QTL_1B.2	64-65-66	GH	Kukri_c147_1620	1B	64.64	212429593	218795266	3.28434	-7.90956	A/G	7.49654
QTL_1B.2		GH	Excalibur_c6497_535	1B	64.86	278473796	284939025	3.02814	-7.45119	A/G	6.77538
QTL_1B.3	78-80-81	GH	wsnp_JD_c6331_7499060	1B	78.45	548967783	555682331	3.11057	10.0888	G/T	7.00169
QTL_1B.3		W	CAP8_c818_370	1B	79.77	557943769	564629571	4.40514	-39.8143	G/T	10.961
QTL_1B.3		W	BS00089563_51	1B	80.58	N/A	N/A	3.25457	31.2684	A/C	7.59584
QTL_1B.4	90-91	GFR	RAC875_c62171_386	1B	90.26	532815027	595537651	3.01902	-0.12241	A/C	6.68314
QTL_1B.5	111-112	FY	Ra_c18630_284	1B	111.39	641199214	648597469	3.09204	-2.45398	C/T	7.58614
QTL_1B.6	120-121	FS	Tdurum_contig8580_586	1B	120.35	N/A	N/A	3.10934	1.80193	G/T	7.03276
NA		MT	RAC875_c87321_108	1D	92.91	416101117	418516338	3.07474	0.534178	C/T	7.96123
QTL_2A.1	103-104-107	FP	GENE-1350_36	2A	104.1	501850092	505560653	3.03215	0.718993	C/T	7.15599
QTL_2A.1		TW	GENE-1350_36	2A	104.1	501850092	505560653	3.20173	-1.18745	C/T	7.56455
QTL_2A.1		FP	Ra_c22880_760	2A	104.13	498105726	501844582	3.03215	-0.718993	A/G	7.15599
QTL_2A.1		TW	Ra_c22880_760	2A	104.13	498105726	501844582	3.20173	1.18745	A/G	7.56455
QTL_2A.1		FP	Ra_c71628_188	2A	104.13	498044024	501783673	3.13898	-0.728797	A/G	7.31974
QTL_2A.1		GP	Ra_c71628_188	2A	104.13	498044024	501783673	3.13017	-0.763833	A/G	7.25427
QTL_2A.1		TW	Ra_c71628_188	2A	104.13	498044024	501783673	3.10656	1.1633	A/G	7.09825
QTL_2A.1		GFD	Excalibur_c6808_959	2A	106.3	N/A	N/A	3.36803	2.71878	A/G	7.77126
QTL_2A.2	143-144	FS	BS00062732_51	2A	143.22	747090405	751088713	3.22477	-1.59914	A/G	7.41365
QTL_2B.1	81-84-85	GFD	Excalibur_c12135_100	2B	81.95	63137251	67890749	3.48619	2.13134	C/T	8.14724
QTL_2B.1		GFD	RAC875_c37837_889	2B	81.95	59724826	101636829	3.30922	1.9783	A/G	7.68849
QTL_2B.1		GFD	IACX6223	2B	82.12	93409707	101013867	3.33172	2.03398	C/T	7.72379
QTL_2B.1		TKW	BS00038217_51	2B	83.8	99961034	107547366	3.24639	2.4597	C/T	7.42087
QTL_2B.1		TKW	Excalibur_c43482_141	2B	83.8	100088801	107705064	3.0142	-2.28823	A/G	6.72434
QTL_2B.1		TKW	BS00038218_51	2B	83.8	99961038	107547370	3.20197	-2.40652	C/T	7.29501
QTL_2B.1		TKW	wsnp_JD_c12687_12877994	2B	83.8	99759578	107347476	3.20197	-2.40652	C/T	7.29501
QTL_2B.1		TKW	BS00043099_51	2B	84.69	99756460	107344358	3.0142	-2.28823	A/C	6.72434
NA		W	BS00055211_51	3A	21.07	12998761	13175324	3.47809	26.6633	C/T	8.13462
QTL_3A.1	66-67	FS	Tdurum_contig91865_242	3A	66.48	41067999	41938186	3.02935	-1.46077	C/T	7.174
NA		GFD	IAAV4781	3A	85.07	107738731	108096175	2.99509	2.93591	C/T	6.73833
NA		GFD	Excalibur_c48047_90	3A	101	N/A	N/A	3.34051	-2.13496	A/G	7.66116
QTL_3B.1	20-21	GFR	BobWhite_c17021_269	3B	20.67	13517542	13820214	3.17133	0.114323	C/T	7.07675
QTL_3B.1		GFR	wsnp_Ex_rep_c67625_66279491	3B	20.67	13502806	13805478	3.13027	-0.113579	C/T	6.96161
QTL_3B.2	56-57-58	FY	wsnp_Ku_c33335_42844680	3B	56.81	60868155	71871076	3.60569	-1.39987	A/G	11.3535
QTL_3B.2		FY	wsnp_Ex_c2820_5215394	3B	57.24	60254883	71245439	3.78076	-1.30346	C/T	9.77029
QTL_3B.2		FY	wsnp_Ku_c33335_42844594	3B	57.24	60868241	71871162	3.85799	-1.32214	A/G	9.99925
QTL_3B.2		GH	Tdurum_contig56933_86	3B	57.43	48886083	59361884	3.06104	9.74212	G/T	6.86808
QTL_3B.3	65-66-67	FP	Excalibur_c14803_1088	3B	65.55	370966101	384909467	3.28709	0.429144	A/G	7.70438
QTL_3B.3		FP	wsnp_Ex_rep_c67067_65534806	3B	65.55	N/A	N/A	3.04332	-0.432039	C/T	7.02143
QTL_3B.3		FP	wsnp_JD_c119_190135	3B	65.55	N/A	N/A	3.71837	-0.467492	A/G	9.04511
QTL_3B.3		GP	wsnp_JD_c119_190135	3B	65.55	N/A	N/A	3.26472	-0.454504	A/G	7.70991
QTL_3B.3		FP	IAAV958	3B	65.55	N/A	N/A	3.73449	-0.471729	A/G	9.01823
QTL_3B.3		GP	IAAV958	3B	65.55	N/A	N/A	3.38652	-0.46769	A/G	7.92969
QTL_3B.3		GP	wsnp_Ex_rep_c69783_68742690	3B	65.55	379994920	391152367	3.42109	0.470153	A/G	8.00807
QTL_3B.3		FP	wsnp_Ex_rep_c69783_68742690	3B	65.55	379994920	391152367	3.76091	0.47332	A/G	9.07927
QTL_3B.3		FP	TA001646-1356	3B	65.55	371039391	384836487	3.76091	-0.47332	C/T	9.07927
QTL_3B.3		GP	TA001646-1356	3B	65.55	371039391	384836487	3.42109	-0.470153	C/T	8.00807
QTL_3B.3		FP	Excalibur_c9001_569	3B	65.71	322880368	333521473	3.06834	-0.421467	A/G	7.06663
QTL_3B.3		FP	RFL_Contig3799_987	3B	65.72	378688217	389854606	3.71837	-0.467492	A/G	9.04511
QTL_3B.3		GP	RFL_Contig3799_987	3B	65.72	378688217	389854606	3.26472	-0.454504	A/G	7.70991
QTL_3B.4	74-75	GH	wsnp_JD_c6974_8084752	3B	74.23	610177684	625178857	3.40415	-16.848	A/G	7.85193
QTL_3B.5	89-91-92	W	wsnp_JD_c4413_5541190	3B	89.13	742171144	757295311	3.15561	28.7182	A/G	7.23599
QTL_3B.5		W	BS00022403_51	3B	90.87	745733254	760866460	3.58536	32.0693	A/G	8.44579
QTL_3B.5		W	Excalibur_c5309_286	3B	91.15	747801143	697313524	4.00209	50.4806	A/G	9.52834
NA		P/L	BS00064896_51	3B	105.94	667235816	675823086	3.19594	0.47589	A/G	8.6063
QTL_3D.1	129-130-131	W	BS00067163_51	3D	130.08	704584831	704835478	3.52247	30.719	A/G	8.39599
QTL_3D.1		W	D_GA8KES402JVT1Y_74	3D	130.08	571550398	572908996	3.02254	-28.5148	A/G	7.95107
QTL_3D.1		W	GENE-1785_118	3D	130.08	704973653	705224746	3.87372	-32.0549	C/T	9.3346
NA		P/L	CAP7_c4219_186	3D	149	731089459	732678431	3.09869	-0.489298	A/G	7.94732
QTL_4A.1	49-51-53	LV	wsnp_Ku_c11945_19406789	4A	48.98	231002068	230612739	3.2089	-96.2435	A/C	7.5619
QTL_4A.1		GH	Excalibur_rep_c70578_299	4A	50.45	562406016	561429150	3.10957	-8.75108	A/G	7.02174
QTL_4A.1		GFD	RAC875_c4629_1344	4A	51.15	565719263	564714222	3.07422	3.96339	A/C	6.91755
QTL_4A.1		GY	RAC875_c4629_1344	4A	51.15	565719263	564714222	3.24186	1.19295	A/C	7.11097
QTL_4A.1		GFD	wsnp_BE637808A_Ta_2_1	4A	51.15	567668361	566653893	3.15971	2.23894	C/T	7.22441
QTL_4A.1		GH	BobWhite_rep_c63429_271	4A	51.97	594139842	601221841	3.07532	9.44793	A/G	6.91882
QTL_4A.1		GH	wsnp_Ex_rep_c104859_89444355	4A	51.97	570477860	569445570	3.07532	-9.44793	A/G	6.91882
QTL_4A.2	56-58-59	MT	BS00041735_51	4A	56.39	594283547	593107459	3.1394	0.282916	C/T	8.19778
QTL_4A.2		GY	BS00041735_51	4A	56.39	594283547	593107459	4.39424	0.513938	C/T	10.3288
QTL_4A.2		GY	wsnp_Ku_rep_c68565_67614479	4A	58.38	594215456	593039759	3.69773	0.602616	C/T	8.35146
QTL_4A.2		GY	BobWhite_rep_c50869_1676	4A	58.38	594218346	593042649	3.80425	-1.05609	C/T	9.1997
QTL_4A.3	136-137-139	LV	Tdurum_contig75819_1220	4A	137.04	N/A	N/A	3.31808	-42.1426	A/G	7.97674
QTL_4A.3		MT	Tdurum_contig75819_1220	4A	137.04	N/A	N/A	3.8112	-0.318464	A/G	10.3885
QTL_4A.3		P	Tdurum_contig75819_1220	4A	137.04	N/A	N/A	4.16049	-13.5106	A/G	11.3123
QTL_4A.3		P	RFL_Contig3841_2595	4A	137.04	712864877	718557898	4.16049	-13.5106	A/G	11.3123
QTL_4A.3		MT	RFL_Contig3841_2595	4A	137.04	712864877	718557898	3.8112	-0.318464	A/G	10.3885
QTL_4A.3		P	Tdurum_contig75819_1471	4A	137.04	712865180	718557595	4.16049	-13.5106	A/G	11.3123
QTL_4A.3		MT	Tdurum_contig75819_1471	4A	137.04	712865180	718557595	3.8112	-0.318464	A/G	10.3885
QTL_4A.3		MT	RFL_Contig3841_1986	4A	137.04	N/A	N/A	3.956	-0.326074	C/T	11.2749
QTL_4A.3		P	RFL_Contig3841_1986	4A	137.04	N/A	N/A	4.29984	-13.7969	C/T	12.1558
QTL_4A.3		MT	RFL_Contig3841_2409	4A	137.04	712865204	718557588	3.956	-0.326074	A/G	11.2749
QTL_4A.3		P	RFL_Contig3841_2409	4A	137.04	712865204	718557588	4.29984	-13.7969	A/G	12.1558
QTL_4A.3		P	RFL_Contig3841_3051	4A	137.04	712863670	718559105	4.27186	13.6335	A/G	12.1067
QTL_4A.3		MT	RFL_Contig3841_3051	4A	137.04	712863670	718559105	3.83744	0.31834	A/G	10.9313
QTL_4A.3		MT	RFL_Contig3841_2433	4A	137.91	712865180	718557595	3.70486	0.308138	C/T	10.0125
QTL_4A.3		P	RFL_Contig3841_2433	4A	137.91	712865180	718557595	4.1185	13.1757	C/T	11.1341
NA		FS	RAC875_c11702_1015	4A	152.99	739524496	748449635	4.43006	1.50317	A/G	10.86
QTL_4B.1	5-6	GH	IAAV7323	4B	5.61	601367332	600175675	3.83784	9.91636	C/T	9.01348
QTL_4B.2	14-16-18	TKW	tplb0025f09_1853	4B	15.91	4849918	6945934	4.39897	2.65122	C/T	10.9121
QTL_4B.2		TKW	tplb0025f09_1052	4B	15.91	N/A	N/A	4.28283	2.59309	A/G	10.5594
QTL_4B.2		TKW	RAC875_c94519_419	4B	15.91	N/A	N/A	3.79857	2.42633	A/C	9.14425
QTL_4B.2		TKW	Tdurum_contig5427_314	4B	15.91	4852467	6943385	3.3242	-2.21471	C/T	7.72959
QTL_4B.2		TKW	Tdurum_contig42083_757	4B	15.91	4851990	599712831	4.57682	-2.66716	A/G	11.2446
QTL_4B.3	60-63-65	W	Kukri_c8973_1986	4B	62.22	418078779	417014379	5.11572	-33.9339	C/T	13.0185
QTL_4B.3		W	wsnp_Ex_c21217_30347572	4B	62.56	N/A	N/A	3.10736	31.318	A/G	7
QTL_4B.3		P	wsnp_Ex_c21217_30347572	4B	62.56	N/A	N/A	3.12098	14.2116	A/G	7.94527
QTL_4B.3		W	Tdurum_contig29989_132	4B	62.56	402571421	408545766	3.32826	-38.6438	A/G	7.71604
QTL_4B.3		FS	Tdurum_contig29989_132	4B	62.56	402571421	408545766	3.04491	-1.65787	A/G	6.85546
QTL_4B.3		W	RAC875_c13639_2159	4B	62.92	327755182	290920653	4.75923	-33.0715	C/T	11.9429
QTL_4B.4	74-76-77	GFD	Excalibur_c37565_709	4B	75.65	N/A	N/A	3.71839	-3.8947	C/T	9.0044
QTL_4B.4		GY	BS00076033_51	4B	75.65	609515871	608393270	3.78857	-0.964302	A/G	8.59028
QTL_4B.5	103-105-106	GY	Kukri_c21787_283	4B	104.79	657296017	657111648	3.1084	0.448951	A/G	6.79172
QTL_4B.5		GY	wsnp_Ex_c4148_7494801	4B	104.79	657295967	657111598	3.09987	-0.448333	C/T	6.77993
QTL_4D.1	9-10	P	IAAV1674	4D	9.33	1876348	1862278	3.02875	25.8142	C/T	7.63124
QTL_4D.2	170-171	W	CAP11_c896_88	4D	170.43	N/A	514105317	3.11229	-60.521	C/T	7.07977
NA		FS	Tdurum_contig43874_1129	5A	49.01	460518546	461039688	2.99686	1.28625	A/G	6.76187
QTL_5A.1	62-63-65	W	TA001269-1282	5A	62.72	N/A	N/A	3.53065	29.425	A/G	8.2202
QTL_5A.1		GFD	Kukri_c63163_141	5A	62.72	519898729	520646275	3.09898	-1.65783	C/T	6.99047
QTL_5A.1		GFD	Excalibur_c2598_2052	5A	64.21	519951514	520699060	3.09898	-1.65783	A/G	6.99047
QTL_5A.2	70-71	FP	Kukri_c75754_239	5A	70.3	539946147	540571927	3.22851	0.574686	A/G	7.80797
QTL_5A.2		GP	Kukri_c75754_239	5A	70.3	539946147	540571927	3.03085	0.581874	A/G	7.14431
QTL_5A.3	89-90-91	GH	RAC875_rep_c113313_607	5A	89.96	362628258	364091725	3.13431	18.8126	A/G	7.06851
QTL_5A.3		GH	wsnp_Ex_c31799_40545478	5A	89.96	585403072	587255362	3.13208	18.8076	A/C	7.06557
QTL_5A.4	94-95	GH	Ku_c12469_983	5A	94.5	596520945	598335726	3.18744	8.73999	A/C	7.21465
QTL_5A.5	104-105	W	wsnp_Ex_c1880_3545329	5A	104.86	637457863	639233038	3.66618	58.3298	A/G	8.54323
QTL_5B.1	51-52-53	MT	wsnp_Ex_c113235_94249366	5B	52.1	438220051	441343742	3.271	-0.517523	C/T	8.58834
QTL_5B.1		P	wsnp_Ex_c113235_94249366	5B	52.1	438220051	441343742	4.0095	-21.5135	C/T	10.7452
QTL_5B.2	56-57	FP	wsnp_Ex_c16963_25554152	5B	56.6	480289090	480755389	3.16598	0.529951	A/G	7.34173
QTL_5B.3	76-78-79	GY	RAC875_c21299_256	5B	76.94	N/A	N/A	4.15455	-0.65715	C/T	9.69645
QTL_5B.3		GY	RAC875_c32611_347	5B	77.81	669816688	671339766	4.41069	0.690757	C/T	10.3727
QTL_5B.3		GY	BobWhite_c19443_131	5B	77.81	N/A	N/A	4.40094	-0.675957	C/T	10.2904
QTL_5B.4	82-83-84	FY	wsnp_Ku_c3102_5810751	5B	82.97	N/A	N/A	3.82297	1.33939	C/T	10.0634
QTL_5B.4		FY	wsnp_Ku_c3102_5811860	5B	82.97	545403288	548497279	3.20563	1.13656	C/T	7.94946
QTL_5B.5	90-91	FY	IACX9261	5B	90.35	546703936	549794304	3.39742	-1.19282	A/C	8.52483
QTL_5B.6	97-98-100	FP	Tdurum_contig12995_792	5B	98.28	559771941	563033743	3.60265	0.520515	C/T	8.8565
QTL_5B.6		FS	Tdurum_contig12995_792	5B	98.28	559771941	563033743	4.93624	1.90389	C/T	12.6332
QTL_5B.6		GP	Tdurum_contig12995_792	5B	98.28	559771941	563033743	3.62252	0.549762	C/T	8.79932
QTL_5B.6		FP	Tdurum_contig12995_722	5B	98.28	N/A	N/A	3.60917	0.513643	C/T	8.60704
QTL_5B.6		FS	Tdurum_contig12995_722	5B	98.28	N/A	N/A	4.60141	1.79843	C/T	11.2644
QTL_5B.6		GP	Tdurum_contig12995_722	5B	98.28	N/A	N/A	3.6635	0.545718	C/T	8.69287
NA		W	BS00094333_51	5D	204.58	559922411	566894671	3.00904	49.9792	A/G	6.80509
NA		GY	Kukri_c77911_260	6A	74.24	100238688	103131562	3.47764	0.493932	C/T	7.78406
QTL_6B.1	70-72-73	W	wsnp_Ku_c3185_5949143	6B	71.76	573689366	581931240	3.16512	-40.0665	C/T	7.28778
QTL_6B.1		MT	wsnp_Ku_c3185_5949143	6B	71.76	573689366	581931240	3.25882	-0.49582	C/T	8.8821
QTL_6B.1		P	wsnp_Ku_c3185_5949143	6B	71.76	573689366	581931240	3.36412	-19.5022	C/T	8.97959
QTL_6B.2	105-106	FS	RAC875_rep_c71463_98	6B	105.5	605378775	608146866	3.21114	1.18641	C/T	7.35957
QTL_6D.1	9-10	P/L	wsnp_Ex_c4789_8550135	6D	9.47	1415202	1407227	3.40953	0.375604	C/T	9.48405
QTL_6D.2	82-83	LV	wsnp_BE445201D_Ta_1_1	6D	82.18	127569558	126964593	3.56275	-120.549	G/T	8.58686
QTL_6D.3	118-119	GFR	RAC875_c30397_887	6D	118.53	601225394	604021973	3.27783	0.127839	A/G	7.68102
QTL_6D.3		GFR	Excalibur_rep_c106283_82	6D	118.53	N/A	N/A	3.13023	0.123745	A/G	7.1497
NA		W	BS00070856_51	6D	153.08	472789815	494584503	3.00084	-26.0656	G/T	6.94766
QTL_7A.1	43-44	MT	RAC875_c11969_384	7A	43.62	N/A	N/A	3.97897	-0.38998	G/T	11.2336
QTL_7A.2	125-127-128	MT	BobWhite_c24760_142	7A	126.4	128510241	132142161	3.34488	-0.350319	C/T	9.06658
QTL_7A.2		P	BobWhite_c24760_142	7A	126.4	128510241	132142161	3.21402	-13.1257	C/T	8.39564
QTL_7A.2		GFD	RAC875_c13221_1017	7A	126.8	131815903	135443852	4.16366	-3.75852	A/G	10.0226
QTL_7A.2		P	wsnp_BE590553A_Ta_2_1	7A	126.8	129060185	132689891	3.05601	-12.7488	C/T	7.92133
QTL_7A.3	222-223	GY	wsnp_Ku_c16022_24798741	7A	222.4	725927365	732278926	3.04023	0.494969	A/G	6.75124
QTL_7B.1	89-90	W	wsnp_Ku_c60707_62509051	7B	89.82	659372722	663442046	3.29983	68.3362	A/G	7.54178
QTL_7B.2	162-163	GY	Kukri_rep_c105287_81	7B	162.22	732650568	744496833	3.2671	0.691832	A/G	7.3195
QTL_7D.1	160-162-163	GP	GENE-2220_165	7D	161.13	575362403	577478339	3.00795	0.844159	C/T	6.91005
QTL_7D.1		GP	GENE-4796_65	7D	162.52	638068829	644043926	3.00795	0.844159	C/T	6.91005
NA		GY	Kukri_rep_c105287_311	7D	208.1	732650338	744496603	3.27686	-0.571811	C/T	7.23497
Chr- Chromosome, Marker- Significant SNPs, CI- Confidence interval in Centi morhgan,Phy Posv1.0- Physical position version 1.0 in basepairs, Phy Posv2.1- Physical position version 2.1 in basepairs, Sig- Significance level of SNP; EFF- Effect; R2 Proportion of the phenotypic variance explained by the QTL, N/A- The MTAs with a physical position that did not correspond with the genetic chromosome, N…

## Sheet: Supplementary table 4
Supplementary table 3: List of candidate genes in window of ±500kb of MTA within the hotspot
Hotspot	gene ID V2.1	Start V2.1	Stop V2.1	Description	gene ID V2.1	TPM	roots	leaves and shoots	spike	grain	milk grain stage	Soft dough	Hard dough	Dough	Ripening	Reg
QTL_1A.1	TraesCS1A03G0029300	8076711	8080232	bZIP transcription factor, putative (DUF1664)	TraesCS1A01G011400	tpm	0	0	0	0	-	-	-	-	-	-
QTL_1A.1	TraesCS1A03G0029400	8081207	8081419	Cytochrome oxidase assembly 3, mitochondrial	TraesCS1A01G011500	tpm	2.61612	2.29874	3.59132	2.12033	1.27559	0.0464152	1.64639	1.7106	2.83152	UR
QTL_1A.1	TraesCS1A03G0029500	8082307	8082522	cytochrome oxidase assembly protein	TraesCS1A01G011600	tpm	4.44985	2.97189	4.16721	2.89673	0	0	0	0	0	NC
QTL_1A.1	TraesCS1A03G0029600	8089436	8089945	RING/U-box superfamily protein	TraesCS1A01G011700	tpm	0	0	0	0	-	-	-	-	-	-
QTL_1A.1	TraesCS1A03G0029700	8104538	8109509	Formin-like protein	TraesCS1A01G011800	tpm	1.89365	0	0.867908	0.263459	0	0	0	0	0.344696	NC
QTL_1A.1	TraesCS1A03G0029800	8233277	8236766	Protein kinase	TraesCS1A01G011900	tpm	0	0	0	0	-	-	-	-	-	-
QTL_1A.1	TraesCS1A03G0029900	8249137	8252647	Protein kinase	TraesCS1A01G012000	tpm	0	0	0	0	-	-	-	-	-	-
QTL_1A.1	TraesCS1A03G0030000	8263670	8265615	Kinase-like protein	TraesCS1A01G012100	tpm	0	0	0	0	-	-	-	-	-	-
QTL_1A.1	TraesCS1A03G0031000	8448758	8449502	aluminum induced protein with YGL and LRDR motifs	TraesCS1A01G012200	tpm	0	0	0	0	-	-	-	-	-	-
QTL_1A.1	TraesCS1A03G0031200	8456694	8457124	Homoserine kinase	TraesCS1A01G012300	tpm	0	0	0	0	-	-	-	-	-	-
QTL_1A.1	TraesCS1A03G0031300	8457959	8463291	F-box protein	TraesCS1A01G012400	tpm	0	0	0.655941	0	-	-	-	-	-	-
QTL_1A.1	TraesCS1A03G0031500	8526026	8532786	Transforming growth factor-beta receptor-associated protein 1	TraesCS1A01G012500	tpm	2.04678	1.40373	1.9665	1.06507	1.9733	1.64391	1.28375	1.39867	1.57207	NC
QTL_1A.1	TraesCS1A03G0031600	8533323	8534333	Leucine-rich repeat receptor-like protein kinase family protein	TraesCS1A01G012600	tpm	6.15908	0	0	0	-	-	-	-	-	-
QTL_1A.1	TraesCS1A03G0031900	8575612	8576836	Fatty acid oxidation complex subunit alpha	TraesCS1A01G012700	tpm	3.03695	0	0	0	-	-	-	-	-	-
QTL_1A.1	TraesCS1A03G0032000	8616326	8617328	Fatty acid oxidation complex subunit alpha	TraesCS1A01G012800	tpm	3.11895	0	0	0	-	-	-	-	-	-
QTL_1A.1	TraesCS1A03G0032100	8618386	8621059	Fatty acid oxidation complex subunit alpha	TraesCS1A01G012900	tpm	3.8527	0	0	0	-	-	-	-	-	-
QTL_1A.1	TraesCS1A03G0032200	8623361	8635717	Disease resistance family protein	TraesCS1A01G013000	tpm	2.35672	0	0	0	-	-	-	-	-	-
QTL_1A.1	TraesCS1A03G0032400	8652783	8653352	MADS-box transcription factor family protein	TraesCS1A01G013100	tpm	0	0	0	0	-	-	-	-	-	-
QTL_1A.1	TraesCS1A03G0032500	8656184	8666852	Ankyrin repeat protein family-like protein	TraesCS1A01G013200	tpm	0	0	0	0	-	-	-	-	-	-
QTL_1A.1	TraesCS1A03G0033100	8862666	8862860	Transketolase family protein	TraesCS1A01G013300	tpm	0	0	0	0	-	-	-	-	-	-
QTL_1A.1	TraesCS1A03G0033200	8866181	8866776	UDP-glycosyltransferase 72E3	TraesCS1A01G013400	tpm	0	0	0	0	-	-	-	-	-	-
QTL_1A.1	TraesCS1A03G0033300	8875965	8876255	DNA-directed RNA polymerase subunit	TraesCS1A01G013500	tpm	0.658706	0	0	0	-	-	-	-	-	-
QTL_1A.1	TraesCS1A03G0033600	8981643	8982502	Defensin	TraesCS1A01G013600	tpm	1.41126	1.76883	3.48075	0	-	-	-	-	-	-
QTL_1A.1	TraesCS1A03G0033800	8990493	8993152	U-box domain protein	TraesCS1A01G013700	tpm	1.10234	1.44208	1.81674	1.13143	1.23026	0.814846	1.53816	1.50203	1.4921	NC
QTL_1A.1	TraesCS1A03G0033900	8996174	9008804	Methionine S-methyltransferase	TraesCS1A01G013800	tpm	4.25025	4.2123	2.85368	0.0471086	0	0	0.191512	0.630895	0	NC
QTL_1A.1	TraesCS1A03G0034000	9014494	9016070	Glutathione s-transferase	TraesCS1A01G013900	tpm	4.11665	0	0	0	-	-	-	-	-	-
QTL_1A.1	TraesCS1A03G0034100	9023921	9024508	Defensin	TraesCS1A01G014000	tpm	0	0	0	5.19673	5.89002	6.54346	4.80579	7.3859	2.45856	DR
QTL_1A.2	TraesCS1A03G0337200	183878062	183902949	Phospholipid-transporting ATPase	TraesCS1A01G132600	tpm	4.32374	4.63197	4.68491	2.4017	3.4398	2.86827	3.30122	3.10567	3.55666	NC
QTL_1A.2	TraesCS1A03G0337700	184093165	184093562	Signal recognition particle 14 kDa protein	TraesCS1A01G132700	tpm	0	0	0	0	-	-	-	-	-	-
QTL_1A.2	TraesCS1A03G0337800	184191292	184298695	Yellow stripe-like transporter 12	TraesCS1A01G132800	tpm	0	0	0	0	-	-	-	-	-	-
QTL_1A.2	TraesCS1A03G0294200	133628628	133630242	Leucine-rich repeat family protein	TraesCS1A01G119600	tpm	1.69806	2.58844	3.55475	2.11967	4.02689	3.23668	1.24027	1.01421	0	DR
QTL_1A.2	TraesCS1A03G0294600	134069462	134077502	MAR-binding filament-like protein 1-1	TraesCS1A01G119700	tpm	3.36997	4.13974	3.43111	1.53014	2.80199	2.01653	1.58813	1.34109	0.428713	DR
QTL_1A.2	TraesCS1A03G0294700	134238700	134240653	senescence-associated family protein, putative (DUF581)	TraesCS1A01G119800	tpm	0	1.04063	1.51032	2.49751	2.81764	1.8302	0.429857	0.750793	0	DR
QTL_1A.2	TraesCS1A03G0294800	134368889	134379505	Copalyl diphosphate synthase	TraesCS1A01G119900	tpm	0	0.245085	0	0.0157975	0.0343755	0	0	0	0	NC
QTL_1A.2	TraesCS1A03G0294900	134517891	134519659	polyamine-modulated factor 1-binding protein	TraesCS1A01G120000	tpm	0.55218	1.14521	1.35419	1.43458	2.7839	2.39059	1.99325	2.05646	1.54945	DR
QTL_1A.2	TraesCS1A03G0363000	225382383	225393456	Mediator of RNA polymerase II transcription subunit 32	TraesCS1A01G137500	tpm	0.670487	1.15989	0.29597	0	-	-	-	-	-	-
QTL_1A.2	TraesCS1A03G0363600	225763316	225765058	KH domain-containing protein	TraesCS1A01G137600	tpm	0	0	0	0	-	-	-	-	-	-
QTL_1A.2	TraesCS1A03G0363800	225873985	225885286	Tobamovirus multiplication protein 2A	TraesCS1A01G137700	tpm	5.42549	5.26294	5.4758	3.48643	4.43635	3.93694	3.62246	3.4847	3.64787	NC
QTL_1A.2	TraesCS1A03G0539800	364876068	364878439	Carboxypeptidase	TraesCS1A01G202100	tpm	0	0	0	0	-	-	-	-	-	-
QTL_1A.2	TraesCS1A03G0539900	364879478	364882307	Trypsin family protein	TraesCS1A01G202200	tpm	0	0	0	0	-	-	-	-	-	-
QTL_1A.2	TraesCS1A03G0540000	364906832	364910486	Protein phosphatase 2C containing protein, expressed	TraesCS1A01G202300	tpm	6.73708	3.46315	3.41658	2.36847	2.907	2.23707	2.87629	2.57108	2.25474	NC
QTL_1A.2	TraesCS1A03G0540200	365055880	365057145	Werner Syndrome-like exonuclease	TraesCS1A01G202400	tpm	0	0	0	0	-	-	-	-	-	-
QTL_1A.2	TraesCS1A03G0540300	365091450	365095396	two-component response regulator	TraesCS1A01G202500	tpm	0	0	0	0	-	-	-	-	-	-
QTL_1A.2	TraesCS1A03G0540400	365108236	365110464	Carboxypeptidase	TraesCS1A01G202600	tpm	0	0	0	0	-	-	-	-	-	-
QTL_1A.2	TraesCS1A03G0540500	365144484	365149911	Malectin/receptor-like protein kinase family protein	TraesCS1A01G202700	tpm	1.41106	2.26559	3.07366	1.84227	2.935	2.63553	2.26332	2.17981	1.827	DR
QTL_1A.2	TraesCS1A03G0540800	365491345	365491812	Ubiquitin, putative	TraesCS1A01G202800	tpm	0	0	0	0	-	-	-	-	-	-
QTL_1A.2	TraesCS1A03G0541000	365498247	365498492	Metallothionein	TraesCS1A01G202900	tpm	0	0	0	0	-	-	-	-	-	-
QTL_1A.3	TraesCS1A03G0736000	491160321	491161498	3-isopropylmalate dehydratase large subunit	TraesCS1A01G294700	tpm	0	0.109438	0.909904	0.475023	1.54625	0.437238	0.575783	0	0	DR
QTL_1A.3	TraesCS1A03G0736100	491476346	491477919	Zinc finger CCCH domain-containing protein 4	TraesCS1A01G294800	tpm	0	0	0	0	-	-	-	-	-	-
QTL_1A.3	TraesCS1A03G0736200	491573304	491575873	CCCH-type zinc fingerfamily protein with RNA-binding domain-containing protein	TraesCS1A01G294900	tpm	0	0	0	0	-	-	-	-	-	-
QTL_1A.3	TraesCS1A03G0736300	491576861	491578409	GDSL esterase/lipase	TraesCS1A01G295000	tpm	0	0	0	0	-	-	-	-	-	-
QTL_1A.3	TraesCS1A03G0736500	491663319	491664909	CCCH-type zinc fingerfamily protein with RNA-binding domain-containing protein	TraesCS1A01G295100	tpm	0	0	0	0	-	-	-	-	-	-
QTL_1A.3	TraesCS1A03G0736800	491860148	491867341	UDP-sugar pyrophosphorylase 1	TraesCS1A01G295200	tpm	2.10966	3.31801	2.17376	0	-	-	-	-	-	-
QTL_1A.3	TraesCS1A03G0737000	491964836	491967746	Ammonium transporter	TraesCS1A01G295300	tpm	2.27389	1.01627	0	0	-	-	-	-	-	-
QTL_1A.3	TraesCS1A03G0737200	491971291	491971919	Histone H4	TraesCS1A01G295400	tpm	5.62647	3.47351	3.04968	1.62057	3.87697	2.41647	0	0	0	DR
QTL_1A.3	TraesCS1A03G0737300	492022848	492023108	Zinc finger CCCH domain-containing protein 44	TraesCS1A01G295500	tpm	0	0	0	0	-	-	-	-	-	-
QTL_1A.3	TraesCS1A03G0737400	492062209	492077129	Chaperone DnaK	TraesCS1A01G295600	tpm	3.84863	2.63949	0.285128	3.0995	3.86981	4.04834	4.80739	5.24244	4.4618	NC
QTL_1A.4	TraesCS1A03G0784100	509457444	509458025	Inositol 1,4,5-trisphosphate receptor type 3	TraesCS1A01G315800	tpm	0	0	0	0	-	-	-	-	-	-
QTL_1A.4	TraesCS1A03G0784500	509630618	509650431	DNA mismatch repair protein MutS	TraesCS1A01G315900	tpm	3.07405	3.66793	3.97193	1.81062	2.58654	1.60348	1.5813	1.43628	0.452102	DR
QTL_1A.4	TraesCS1A03G0784800	509687258	509698526	Cyclin-dependent kinase 2-interacting protein	TraesCS1A01G316100	tpm	2.93509	3.23731	3.43304	2.03177	2.02627	1.31066	1.58899	1.32225	0.643741	DR
QTL_1A.4	TraesCS1A03G0785200	509711165	509711694	Blue copper protein	TraesCS1A01G316200	tpm	0	0	0	0	-	-	-	-	-	-
QTL_1A.4	TraesCS1A03G0785400	509770669	509771136	Blue copper protein	TraesCS1A01G316300	tpm	0	0	0	0	-	-	-	-	-	-
QTL_1A.4	TraesCS1A03G0785700	509778023	509778385	Blue copper protein	TraesCS1A01G316400	tpm	0	0	0	0	-	-	-	-	-	-
QTL_1A.4	TraesCS1A03G0785800	509783160	509783582	MAP kinase kinase 2	TraesCS1A01G316500	tpm	0	0	0	0	-	-	-	-	-	-
QTL_1A.4	TraesCS1A03G0786100	509805920	509806282	Blue copper protein	TraesCS1A01G316600	tpm	0	0	0	0	-	-	-	-	-	-
QTL_1A.4	TraesCS1A03G0786300	509829550	509831914	Blue copper protein	TraesCS1A01G316700	tpm	0	0	0	0	-	-	-	-	-	-
QTL_1A.4	TraesCS1A03G0786500	509837130	509837492	Blue copper protein	TraesCS1A01G316800	tpm	0	0	0	0	-	-	-	-	-	-
QTL_1A.4	TraesCS1A03G0786600	510022970	510024860	Protein translation factor SUI1-like protein	TraesCS1A01G316900	tpm	7.68087	8.21118	8.51416	8.70089	7.29972	5.90842	6.03969	5.69492	5.07429	DR
QTL_1A.4	TraesCS1A03G0787000	510051474	510054986	actin cytoskeleton-regulatory complex pan-like protein	TraesCS1A01G317000	tpm	3.60896	1.96696	3.67849	1.27333	1.90909	1.25496	1.19585	0.796336	0.654536	DR
QTL_1A.4	TraesCS1A03G0787300	510124024	510129469	Histone deacetylase	TraesCS1A01G317100	tpm	1.24268	0.908403	1.54754	2.06653	2.45397	1.33627	0.782091	0.849714	0.256306	DR
QTL_1A.4	TraesCS1A03G0787500	510136813	510140336	DCD (Development and cell death) domain protein	TraesCS1A01G317200	tpm	7.52988	8.41353	8.29524	7.73868	7.22446	7.28286	7.81546	8.05611	7.54783	NC
QTL_1A.4	TraesCS1A03G0799600	515079490	515084222	H/ACA ribonucleoprotein complex non-core subunit NAF1	TraesCS1A01G322700	tpm	2.11663	1.66272	0.919142	0	-	-	-	-	-	-
QTL_1A.4	TraesCS1A03G0799800	515093872	515094672	NB-ARC domain-containing disease resistance protein	TraesCS1A01G322800	tpm	0	0	0	0	-	-	-	-	-	-
QTL_1A.4	TraesCS1A03G0800500	515153442	515154938	NB-ARC domain-containing disease resistance protein	TraesCS1A01G322900	tpm	0	0	0	0	-	-	-	-	-	-
QTL_1A.4	TraesCS1A03G0800700	515165824	515167590	NB-ARC domain-containing disease resistance protein	TraesCS1A01G323000	tpm	0	0.045518	0.0644276	0	-	-	-	-	-	-
QTL_1A.4	TraesCS1A03G0800900	515190167	515191617	UDP-glycosyltransferase	TraesCS1A01G323100	tpm	0	0	0	0	-	-	-	-	-	-
QTL_1A.4	TraesCS1A03G0801100	515221800	515230900	Secretory carrier-associated membrane protein	TraesCS1A01G323200	tpm	6.0843	5.37871	6.28842	4.62734	5.1635	4.45721	4.24968	4.1011	3.59855	DR
QTL_1A.4	TraesCS1A03G0801200	515236339	515237692	Regulator of Vps4 activity in the MVB pathway protein	TraesCS1A01G323300	tpm	0	0	0	0	-	-	-	-	-	-
QTL_1A.4	TraesCS1A03G0801400	515239020	515243302	Sulfite reductase [NADPH] hemoprotein beta-component	TraesCS1A01G323400	tpm	6.47758	5.68868	4.20423	3.20751	3.32013	2.38784	3.25422	3.24601	3.97833	NC
QTL_1A.4	TraesCS1A03G0801800	515382129	515396573	DNA helicase	TraesCS1A01G323500	tpm	0.951964	0	0.693002	0	-	-	-	-	-	-
QTL_1A.4	TraesCS1A03G0802600	515635940	515638791	NBS-LRR disease resistance protein	TraesCS1A01G323600	tpm	0	3.05787	3.5498	0	-	-	-	-	-	-
QTL_1A.5	TraesCS1A03G0838800	531834472	531837992	Protein kinase	TraesCS1A01G339600	tpm	3.11991	2.53525	3.03458	0.0682993	1.09382	0	0.200776	0	0	DR
QTL_1A.5	TraesCS1A03G0838900	531840501	531842260	DUF506 family protein	TraesCS1A01G339700	tpm	0	0	0	0	-	-	-	-	-	-
QTL_1A.5	TraesCS1A03G0839000	531867170	531872300	DUF616 family protein	TraesCS1A01G339800	tpm	4.17124	2.66406	4.34597	1.06169	2.18923	1.35545	1.40936	0.614419	0.325778	DR
QTL_1A.5	TraesCS1A03G0839100	531874454	531881740	ATP-dependent zinc metalloprotease FtsH	TraesCS1A01G339900	tpm	5.45877	4.95931	5.4722	3.79674	4.36226	3.41123	3.27036	2.81666	2.52273	DR
QTL_1A.5	TraesCS1A03G0839200	531896313	531901312	WD40 repeat-like protein	TraesCS1A01G340000	tpm	3.18339	2.90152	2.61146	0	-	-	-	-	-	-
QTL_1A.5	TraesCS1A03G0839300	531921013	531924476	ATP-dependent chaperone ClpB	TraesCS1A01G340100	tpm	0	0	0.491576	2.51217	1.70249	2.44944	3.43666	4.55527	2.97455	UR
QTL_1A.5	TraesCS1A03G0839500	532174089	532177672	Transcriptional regulatory plant protein, putative	TraesCS1A01G340200	tpm	3.0181	3.79352	2.36641	1.51452	2.28963	1.82933	2.8628	3.03958	2.6541	NC
QTL_1A.5	TraesCS1A03G0839600	532177900	532185911	Receptor-like protein kinase	TraesCS1A01G340300	tpm	0	0	0	0	-	-	-	-	-	-
QTL_1A.5	TraesCS1A03G0840000	532255297	532262030	Dolichyl-diphosphooligosaccharide--protein glycosyltransferase subunit STT3	TraesCS1A01G340400	tpm	5.5451	4.93778	5.34783	3.79116	4.77447	3.6654	3.40609	3.12448	2.85142	DR
QTL_1B.1	N/A	N/A	N/A	N/A	N/A	N/A	N/A	N/A	N/A	N/A	-	-	-	-	-	-
QTL_1B.1	N/A	N/A	N/A	N/A	N/A	N/A	N/A	N/A	N/A	N/A	-	-	-	-	-	-
QTL_1B.2	TraesCS1B03G0407100	218775057	218779921	S-type anion channel	TraesCS1B01G147400	tpm	0	0	0	0	-	-	-	-	-	-
QTL_1B.2	TraesCS1B03G0408700	219112064	219114787	Rhomboid family protein	TraesCS1B01G147500	tpm	0	0	1.17017	0	-	-	-	-	-	-
QTL_1B.2	TraesCS1B03G0468800	284555769	284559956	3-ketoacyl-CoA thiolase	TraesCS1B01G161300	tpm	5.52536	4.33678	5.24516	4.95381	5.09278	4.16047	3.41208	2.42831	1.75458	DR
QTL_1B.2	TraesCS1B03G0468900	284925045	284947007	DNA repair protein-like protein	TraesCS1B01G161400	tpm	3.44582	2.54474	3.4025	0	-	-	-	-	-	-
QTL_1B.2	TraesCS1B03G0469000	285095353	285097092	GDSL esterase/lipase	TraesCS1B01G161500	tpm	0	0	0	0	-	-	-	-	-	-
QTL_1B.3	TraesCS1B03G0886500	555231431	555231784	VQ motif-containing protein	TraesCS1B01G323400	tpm	0	0	0	0	-	-	-	-	-	-
QTL_1B.3	TraesCS1B03G0886600	555248264	555254304	Zinc finger protein 830	TraesCS1B01G323500	tpm	3.12265	3.06835	3.01525	3.15839	2.96916	2.38022	3.34563	3.47135	3.87341	NC
QTL_1B.3	TraesCS1B03G0886700	555256703	555258281	Transcription factor	TraesCS1B01G323600	tpm	0	0	0	0	-	-	-	-	-	-
QTL_1B.3	TraesCS1B03G0886900	555327390	555331240	Adenine phosphoribosyltransferase-like protein, putative (DUF2358)	TraesCS1B01G323700	tpm	0	1.7626	2.02753	0.49773	0.783758	1.64107	0	0	0	NC
QTL_1B.3	TraesCS1B03G0887600	555689729	555691626	SOSS complex subunit B-like protein	TraesCS1B01G323800	tpm	0.724449	0	0	0	-	-	-	-	-	-
QTL_1B.3	TraesCS1B03G0888100	556088099	556089118	tRNA dimethylallyltransferase	TraesCS1B01G323900	tpm	0	0	0	0	-	-	-	-	-	-
QTL_1B.3	TraesCS1B03G0888400	556156867	556169853	Calcium-transporting ATPase	TraesCS1B01G324000	tpm	2.69861	0	0.589581	0	-	-	-	-	-	-
QTL_1B.3	TraesCS1B03G0909000	564149711	564150136	UDP-glycosyltransferase	TraesCS1B01G331600	tpm	0	0	0	0	-	-	-	-	-	-
QTL_1B.3	TraesCS1B03G0909500	564604046	564605071	plant/protein (DUF1995)	TraesCS1B01G331700	tpm	0	0	0	0	-	-	-	-	-	-
QTL_1B.3	TraesCS1B03G0909600	564607654	564607968	Allyl alcohol dehydrogenase-like protein	TraesCS1B01G331800	tpm	0	0	0	0	-	-	-	-	-	-
QTL_1B.3	TraesCS1B03G0909700	564628042	564629705	Heat shock protein	TraesCS1B01G331900	tpm	1.35726	0	0	0	-	-	-	-	-	-
QTL_1B.3	TraesCS1B03G0909800	564772860	564774495	GRAS transcription factor	TraesCS1B01G332000	tpm	0	0	0	0	-	-	-	-	-	-
QTL_1B.3	TraesCS1B03G0909900	564907799	564908515	S-adenosyl-L-methionine-dependent methyltransferases superfamily protein, putative	TraesCS1B01G332100	tpm	0	0	0	0	-	-	-	-	-	-
QTL_1B.3	TraesCS1B03G0910000	564966314	564968156	2-oxoglutarate (2OG) and Fe(II)-dependent oxygenase superfamily protein	TraesCS1B01G332200	tpm	0	0	0	0	-	-	-	-	-	-
QTL_1B.4	TraesCS1B03G0978100	595062835	595067605	Protein kinase, putative	TraesCS1B01G358600	tpm	0	0	0	0	-	-	-	-	-	-
QTL_1B.4	TraesCS1B03G0978900	595141585	595143725	Leucine-rich repeat receptor-like protein kinase family protein	TraesCS1B01G358700	tpm	0	0	0	0	-	-	-	-	-	-
QTL_1B.4	TraesCS1B03G0979100	595229626	595233808	Receptor-like protein kinase	TraesCS1B01G358800	tpm	0	0	0	0	-	-	-	-	-	-
QTL_1B.4	TraesCS1B03G0979500	595331941	595335834	DNA-directed RNA polymerase subunit alpha	TraesCS1B01G358900	tpm	0	0	0	0	-	-	-	-	-	-
QTL_1B.4	TraesCS1B03G0979600	595358159	595359255	basic helix-loop-helix (bHLH) DNA-binding superfamily protein	TraesCS1B01G359000	tpm	0	0	0	0	-	-	-	-	-	-
QTL_1B.4	TraesCS1B03G0979700	595385385	595386350	p-loop containing nucleoside triphosphate hydrolases superfamily protein	TraesCS1B01G359100	tpm	0.72927	1.9684	2.05242	0.232464	1.16935	0.756653	0.366797	1.77057	0.887138	NC
QTL_1B.4	TraesCS1B03G0979800	595390726	595394988	Protein kinase, putative	TraesCS1B01G359200	tpm	0.405765	0	0	0	-	-	-	-	-	-
QTL_1B.4	TraesCS1B03G0979900	595395461	595400467	Receptor-like protein kinase	TraesCS1B01G359300	tpm	2.31387	0	0	0	-	-	-	-	-	-
QTL_1B.4	TraesCS1B03G0980000	595401465	595406282	Receptor-like protein kinase	TraesCS1B01G359400	tpm	0.544473	0	0	0	-	-	-	-	-	-
QTL_1B.4	TraesCS1B03G0980100	595407482	595408661	(R)-specific enoyl-CoA hydratase	TraesCS1B01G359500	tpm	0	0	0	0	-	-	-	-	-	-
QTL_1B.4	TraesCS1B03G0980500	595427127	595427358	30S ribosomal protein S15	TraesCS1B01G359600	tpm	0	0	0	0	-	-	-	-	-	-
QTL_1B.4	TraesCS1B03G0980600	595427794	595440416	Mediator of RNA polymerase II transcription subunit 15a	TraesCS1B01G359700	tpm	0	0	0	0	-	-	-	-	-	-
QTL_1B.4	TraesCS1B03G0980800	595538165	595549255	Alpha-glucan water dikinase	TraesCS1B01G359800	tpm	0	0	0	0	-	-	-	-	-	-
QTL_1B.4	TraesCS1B03G0980900	595554264	595559094	Protein kinase, putative	TraesCS1B01G359900	tpm	0	0	0	0	-	-	-	-	-	-
QTL_1B.4	TraesCS1B03G0981100	595743993	595745142	Leucine-rich repeat protein kinase-like protein	TraesCS1B01G360000	tpm	0	0	0	0	-	-	-	-	-	-
QTL_1B.4	TraesCS1B03G0981200	595745401	595749071	Receptor-like protein kinase	TraesCS1B01G360100	tpm	0.705394	0	0	0	-	-	-	-	-	-
QTL_1B.4	TraesCS1B03G0981300	595780294	595784854	Pentatricopeptide repeat-containing protein	TraesCS1B01G360200	tpm	0.115739	0	0	0	-	-	-	-	-	-
QTL_1B.4	TraesCS1B03G0981700	595803476	595804712	Zinc finger CCCH domain-containing protein	TraesCS1B01G360300	tpm	0	0	0	0	-	-	-	-	-	-
QTL_1B.4	TraesCS1B03G0982400	596031354	596034337	NBS-LRR-like resistance protein	TraesCS1B01G360400	tpm	0	0	0	0	-	-	-	-	-	-
QTL_1B_5	TraesCS1B03G1120600	648204029	648205031	Pre-mRNA-processing-splicing factor 8	TraesCS1B01G415700	tpm	3.76596	2.39152	4.83425	0.531509	0	0	0	0	1.51058	UR
QTL_1B_5	TraesCS1B03G1120700	648245559	648252925	Ubiquitin-conjugating enzyme E2	TraesCS1B01G415800	tpm	5.94483	4.84763	3.89178	1.58048	2.01389	0.814518	1.10558	0.669154	0.896073	DR
QTL_1B_5	TraesCS1B03G1120800	648264894	648267929	50S ribosomal protein L21	TraesCS1B01G415900	tpm	3.75706	3.10216	2.46291	2.31511	3.07755	2.16102	3.21866	3.73631	3.28012	NC
QTL_1B_5	TraesCS1B03G1121200	648422551	648435949	Cysteine/Histidine-rich C1 domain family protein	TraesCS1B01G416000	tpm	0	0	0	0	-	-	-	-	-	-
QTL_1B_5	TraesCS1B03G1121400	648437499	648438047	vacuolar protein sorting-associated protein, putative (DUF1162)	TraesCS1B01G416100	tpm	0.929715	2.29342	2.85487	0	-	-	-	-	-	-
QTL_1B_5	TraesCS1B03G1121800	648595089	648602239	Disease resistance protein (NBS-LRR class) family	TraesCS1B01G416200	tpm	0.484965	0	0	0	-	-	-	-	-	-
QTL_1B_5	TraesCS1B03G1121900	648610749	648611179	Minichromosome maintenance (MCM2/3/5) family protein	TraesCS1B01G416300	tpm	0	0	0	0	-	-	-	-	-	-
QTL_1B_5	TraesCS1B03G1122000	648671886	648672955	Pre-mRNA-processing-splicing factor 8	TraesCS1B01G416400	tpm	0.113407	0.678464	0.714733	0	-	-	-	-	-	-
QTL_1B_5	TraesCS1B03G1123000	648916410	648916703	Ferredoxin	TraesCS1B01G416500	tpm	0	0	0	0	-	-	-	-	-	-
QTL_1B_5	TraesCS1B03G1123100	648920000	648920455	Histone H2B	TraesCS1B01G416600	tpm	4.60949	3.38402	2.31732	1.39547	3.71953	2.47348	0	0	0	DR
QTL_1B_5	TraesCS1B03G1123200	648925336	648931896	Serine carboxypeptidase family protein, expressed	TraesCS1B01G416700	tpm	0	0	1.86885	0	-	-	-	-	-	-
QTL_1B_5	TraesCS1B03G1123300	648936071	648939531	Alpha/beta-Hydrolases superfamily protein	TraesCS1B01G416800	tpm	0.591344	0	0	0	-	-	-	-	-	-
QTL_1B_5	TraesCS1B03G1123400	648945520	648946068	DNA topoisomerase	TraesCS1B01G416900	tpm	0	0	0	0	-	-	-	-	-	-
QTL_1B_5	TraesCS1B03G1123500	648946573	648949616	Oxidoreductase	TraesCS1B01G417000	tpm	1.33227	2.1369	0.909074	0	-	-	-	-	-	-
QTL_1B_5	TraesCS1B03G1123700	649026820	649028867	Cytochrome c oxidase assembly protein COX19	TraesCS1B01G417100	tpm	1.74792	1.8806	0.590252	0.506064	0.0973347	0	1.60088	1.71145	1.82644	UR
QTL_1B_5	TraesCS1B03G1123800	649029048	649030861	Ribosomal protein	TraesCS1B01G417200	tpm	4.21575	4.23376	2.77753	1.73858	2.69073	2.20909	3.27198	3.54714	3.14362	NC
QTL_1B_5	TraesCS1B03G1124300	649081205	649081456	Short-chain dehydrogenase/reductase	TraesCS1B01G417300	tpm	0	0	0	0	-	-	-	-	-	-
QTL_1B_6	TraesCS1B03G1148500	655920492	655921932	Xyloglucan endotransglucosylase/hydrolase	TraesCS1B01G424500	tpm	5.62023	5.23219	4.8409	0	-	-	-	-	-	-
QTL_1B_6	TraesCS1B03G1149100	656137025	656137573	MUTS-homologue 5	TraesCS1B01G424600	tpm	0	0	0	0	-	-	-	-	-	-
QTL_1B_6	TraesCS1B03G1149500	656371313	656376860	Auxin response factor	TraesCS1B01G424700	tpm	1.55585	2.42112	3.73086	0.47981	1.24891	0.634042	0.886766	0.886983	0.824866	NC
QTL_1B_6	TraesCS1B03G1150200	656648622	656651145	E3 SUMO-protein ligase MMS21	TraesCS1B01G424800	tpm	1.5397	1.29524	0.983386	1.23654	1.98101	1.24481	2.25392	2.58542	2.15348	NC
QTL_1B_6	TraesCS1B03G1150400	656687332	656688135	Fasciclin-like arabinogalactan protein	TraesCS1B01G424900	tpm	3.96794	2.37999	2.06874	1.11551	0	0	0	0	0	NC
QTL_1B_6	TraesCS1B03G1150600	656744720	656746166	Fasciclin-like arabinogalactan protein	TraesCS1B01G425000	tpm	3.25656	3.97527	3.58848	0.736908	4.91874	3.90964	2.95814	0.455211	0	DR
QTL_1B_6	TraesCS1B03G1150800	656747788	656748975	DNA topoisomerase	TraesCS1B01G425100	tpm	0	0	0	0	-	-	-	-	-	-
QTL_2A_1	TraesCS2A03G0727700	505278183	505285956	Heparan-alpha-glucosaminide N-acetyltransferase	TraesCS2A01G291000	tpm	3.16682	3.27815	3.29864	1.91312	1.87943	2.38595	3.58927	0	0.427875	DR
QTL_2A_1	TraesCS2A03G0727900	505553357	505558025	ATP-dependent Clp protease ATP-binding subunit	TraesCS2A01G291100	tpm	3.53866	4.35268	3.92389	1.83681	2.08065	2.40592	2.57192	2.06627	2.08345	NC
QTL_2A_1	TraesCS2A03G0728000	505559757	505563715	Mitochondrial import inner membrane translocase subunit TIM22	TraesCS2A01G291200	tpm	3.83727	4.53607	3.3976	3.28904	3.91408	3.15451	3.095	3.08277	2.67795	DR
QTL_2A_1	TraesCS2A03G0728100	505772354	505773523	Short-chain dehydrogenase/reductase	TraesCS2A01G291300	tpm	0	0	0	0	-	-	-	-	-	-
QTL_2A_1	TraesCS2A03G0728200	506028783	506029907	OJ000315_02.19 protein	TraesCS2A01G291400	tpm	1.56014	0	1.6392	0	-	-	-	-	-	-
QTL_2A_1	TraesCS2A03G0728400	506034343	506042936	Initiation factor 4F subunit (DUF1350)	TraesCS2A01G291500	tpm	3.7585	3.9089	2.98742	2.27263	1.81514	1.17879	1.63747	0.799869	0.486227	DR
QTL_2A_1	TraesCS2A03G0728800	506043237	506044496	UPF0496 protein	TraesCS2A01G291600	tpm	0	0	0	0	-	-	-	-	-	-
QTL_2A_1	TraesCS2A03G0723800	501392510	501397654	Potassium transporter	TraesCS2A01G289300	tpm	1.91184	1.5269	2.51001	1.01808	1.31542	0	1.95439	0	1.10413	NC
QTL_2A_1	TraesCS2A03G0724000	501781776	501783785	Potassium transporter	TraesCS2A01G289400	tpm	0	0	0	0	-	-	-	-	-	-
QTL_2A_1	TraesCS2A03G0724400	501825136	501827997	Zinc finger protein	TraesCS2A01G289500	tpm	0	0	0	0	-	-	-	-	-	-
QTL_2A_1	TraesCS2A03G0724500	501828983	501832593	DNA cross-link repair protein	TraesCS2A01G289600	tpm	0.761413	0.658083	0	0	-	-	-	-	-	-
QTL_2A_1	TraesCS2A03G0724600	501837034	501843261	Tyrosyl-DNA phosphodiesterase 1	TraesCS2A01G289700	tpm	0.23897	0	0	0	-	-	-	-	-	-
QTL_2A_1	TraesCS2A03G0724700	501843539	501848090	Alpha-amylase	TraesCS2A01G289800	tpm	3.12987	3.94459	4.10063	3.01783	2.97629	2.2737	2.57992	2.3783	2.44932	NC
QTL_2A_2	TraesCS2A03G1220400	750598697	750600050	Mitochondrial transcription termination factor family protein	TraesCS2A01G525900	tpm	0	0	0	0	-	-	-	-	-	-
QTL_2A_2	TraesCS2A03G1220500	750600268	750608301	DNA polymerase I	TraesCS2A01G526000	tpm	2.81204	3.99861	3.27871	0.0482362	1.76838	1.34965	1.69582	1.97456	1.64774	NC
QTL_2A_2	TraesCS2A03G1220600	750612076	750613363	Epidermal patterning factor	TraesCS2A01G526100	tpm	0	0	0	0	-	-	-	-	-	-
QTL_2A_2	TraesCS2A03G1220700	750622133	750624588	Pentatricopeptide repeat-containing protein	TraesCS2A01G526200	tpm	0	0	0	0	-	-	-	-	-	-
QTL_2A_2	TraesCS2A03G1221000	750683325	750689454	transcription factor-like protein	TraesCS2A01G526300	tpm	1.98843	3.1577	2.38921	0.656826	1.72608	1.34748	1.21804	0	0	DR
QTL_2A_2	TraesCS2A03G1221100	750755006	750757169	RNA binding protein	TraesCS2A01G526400	tpm	2.51202	2.37269	2.30718	2.38554	2.71468	2.15847	2.49954	2.43789	1.59428	DR
QTL_2A_2	TraesCS2A03G1221200	750762930	750765737	pesticidal crystal cry8Ba protein	TraesCS2A01G526500	tpm	5.35383	5.94558	5.72819	4.44462	4.27542	3.48271	3.89871	4.05929	2.89058	DR
QTL_2A_2	TraesCS2A03G1221500	750776735	750795201	Epoxide hydrolase, putative, expressed	TraesCS2A01G526600	tpm	0	0	0	0	-	-	-	-	-	-
QTL_2A_2	TraesCS2A03G1221600	750798145	750805492	MICOS complex subunit MIC60	TraesCS2A01G526700	tpm	4.19162	3.71383	3.72434	2.45513	3.01641	2.33054	2.67672	2.90312	2.82347	NC
QTL_2A_2	TraesCS2A03G1221700	750840250	750842646	RING/U-box superfamily protein	TraesCS2A01G526800	tpm	0	0	0	0	-	-	-	-	-	-
QTL_2A_2	TraesCS2A03G1221900	750851966	750856178	BTB/POZ domain-containing protein	TraesCS2A01G526900	tpm	0	0	0	0	-	-	-	-	-	-
QTL_2A_2	TraesCS2A03G1222000	750916493	750917538	RING/U-box superfamily protein	TraesCS2A01G527000	tpm	0	0	0	0	-	-	-	-	-	-
QTL_2A_2	TraesCS2A03G1222400	750932946	750935051	Nuclease S1	TraesCS2A01G527100	tpm	1.92217	2.63063	2.15447	1.96517	3.6426	2.91177	0	0	0	DR
QTL_2A_2	TraesCS2A03G1222500	750935493	750938246	Cystathionine beta-lyase family protein	TraesCS2A01G527200	tpm	0	1.28257	0.0909618	0	-	-	-	-	-	-
QTL_2A_2	TraesCS2A03G1222600	750939401	750940823	NBS-LRR disease resistance protein-like protein	TraesCS2A01G527300	tpm	0	0	0	0	-	-	-	-	-	-
QTL_2A_2	TraesCS2A03G1222800	750956376	750960290	NBS-LRR disease resistance protein-like protein	TraesCS2A01G527400	tpm	0	0	0	0	-	-	-	-	-	-
QTL_2A_2	TraesCS2A03G1222900	750965166	750968263	Micronuclear linker histone polyprotein-like protein	TraesCS2A01G527500	tpm	3.50561	0	0	0	-	-	-	-	-	-
QTL_2A_2	TraesCS2A03G1223000	750968467	750971267	Hexosyltransferase	TraesCS2A01G527600	tpm	4.76701	3.36359	3.64909	2.19571	2.56396	1.67422	1.63567	1.07023	1.23259	DR
QTL_2A_2	TraesCS2A03G1223400	751085238	751088364	Chalcone synthase	TraesCS2A01G527700	tpm	2.62781	3.67656	5.83797	1.72308	0	0.658059	0.404824	1.06227	0	NC
QTL_2A_2	TraesCS2A03G1223500	751140607	751142750	Receptor-like kinase	TraesCS2A01G527800	tpm	0	0	2.4492	0	-	-	-	-	-	-
QTL_2A_2	TraesCS2A03G1223600	751143217	751143516	Chromodomain-helicase-DNA-binding protein 7	TraesCS2A01G527900	tpm	0	0	2.12701	0	-	-	-	-	-	-
QTL_2A_2	TraesCS2A03G1223700	751151560	751151925	Receptor-like protein kinase	TraesCS2A01G528000	tpm	0	0	0	0	-	-	-	-	-	-
QTL_2A_2	TraesCS2A03G1223800	751158083	751159868	3-oxoacyl-reductase	TraesCS2A01G528100	tpm	0	0	0	0	-	-	-	-	-	-
QTL_2A_2	TraesCS2A03G1224100	751247442	751248262	Antimicrobial peptide	TraesCS2A01G528200	tpm	0	0	0	8.61945	7.6167	10.3632	9.76321	10.4229	7.34133	NC
QTL_2A_2	TraesCS2A03G1224600	751310449	751313021	Heterogeneous nuclear ribonucleoprotein U-like protein 1	TraesCS2A01G528300	tpm	0.825737	2.1055	1.57361	0.749139	0.812944	0.771097	0.634665	0.680372	0.291071	NC
QTL_2A_2	TraesCS2A03G1224700	751315922	751326096	Antimicrobial peptide	TraesCS2A01G528400	tpm	0	0	0	0	-	-	-	-	-	-
QTL_2B.1	TraesCS2B03G0318100	105019124	105020843	Kelch repeat-containing protein	TraesCS2B01G130200	tpm	0	0	0.0723802	0	-	-	-	-	-	-
QTL_2B.1	TraesCS2B03G0318200	105024612	105025657	Ultraviolet-B-repressible protein	TraesCS2B01G130300	tpm	0	4.30907	1.88278	0.18011	4.77808	3.45155	1.84866	0	1.10098	DR
QTL_2B.1	TraesCS2B03G0318500	105509103	105514434	splicing factor-like protein	TraesCS2B01G130400	tpm	4.10832	4.07928	4.53505	4.13281	4.40316	4.0676	4.42716	4.45487	4.73538	NC
QTL_2B.1	TraesCS2B03G0318600	105513595	105514364	Universal stress protein	TraesCS2B01G130500	tpm	0	0	0	0	-	-	-	-	-	-
QTL_2B.1	TraesCS2B03G0318700	105515113	105517361	F-box protein	TraesCS2B01G130600	tpm	2.35938	2.05399	2.73487	1.86278	1.92269	1.09483	1.08757	1.04969	0.838527	DR
QTL_2B.1	TraesCS2B03G0318800	105521101	105530576	GPI-anchored wall transfer protein 1	TraesCS2B01G130700	tpm	3.24762	2.71635	3.70387	0.917816	2.34512	1.77977	2.26425	1.97924	1.77544	NC
QTL_2B.1	TraesCS2B03G0319000	105532946	105537392	Protein AIG1	TraesCS2B01G130900	tpm	4.06035	4.36111	3.16633	3.69768	3.60228	3.94457	4.13436	4.21602	5.3757	UR
QTL_2B.1	TraesCS2B03G0319700	105832950	105834435	Aspartic proteinase nepenthesin-1	TraesCS2B01G131100	tpm	0	0	0	2.78858	5.39239	1.77866	0	0	0	DR
QTL_2B.1	TraesCS2B03G0319800	105834728	105836268	Universal stress protein	TraesCS2B01G131200	tpm	0.678838	0.150869	0	0	-	-	-	-	-	-
QTL_2B.1	TraesCS2B03G0320000	105842641	105843695	Universal stress protein	TraesCS2B01G131300	tpm	0	0	0	0.614719	0.811017	1.79611	0.450374	0.509851	0	NC
QTL_2B.1	TraesCS2B03G0320100	105863805	105865240	Universal stress protein	TraesCS2B01G131400	tpm	0	0.950685	1.90764	0	-	-	-	-	-	-
QTL_2B.1	TraesCS2B03G0320200	105872597	105877806	THUMP domain-containing protein 1	TraesCS2B01G131500	tpm	3.85311	3.49452	2.97733	2.59198	3.09281	2.55157	4.03507	4.28094	4.66865	UR
QTL_2B.1	TraesCS2B03G0320400	105881684	105885037	E3 ubiquitin-protein ligase	TraesCS2B01G131600	tpm	0	0	0	0	-	-	-	-	-	-
QTL_2B.1	TraesCS2B03G0320500	105885450	105889776	Ubiquitin-like-specific protease ESD4	TraesCS2B01G131700	tpm	0.137136	0	0	0	-	-	-	-	-	-
QTL_2B.1	TraesCS2B03G0320600	105920622	105925003	F-actin capping protein alpha subunit	TraesCS2B01G131800	tpm	2.95427	3.31827	3.86101	2.74878	2.70857	2.39426	2.54094	2.84668	2.57834	NC
QTL_2B.1	TraesCS2B03G0320800	105925864	105928178	Ribosomal protein S8e/ribosomal biogenesis NSA2	TraesCS2B01G131900	tpm	6.75765	6.66733	5.39538	5.25135	4.81283	4.60921	7.36569	7.55083	7.21658	UR
QTL_2B.1	TraesCS2B03G0320700	105925335	105931254	Zinc finger CCCH domain protein, putative	TraesCS2B01G132000	tpm	0.926546	1.1118	0.877187	0	-	-	-	-	-	-
QTL_2B.1	TraesCS2B03G0321000	106003932	106005631	UDP-glycosyltransferase	TraesCS2B01G132100	tpm	0	0	0	0	-	-	-	-	-	-
QTL_2B.1	TraesCS2B03G0307200	101236450	101236809	transmembrane protein, putative (DUF594)	TraesCS2B01G125000	tpm	0	0	0	0	-	-	-	-	-	-
QTL_2B.1	TraesCS2B03G0307300	101242305	101243352	Peroxidase	TraesCS2B01G125100	tpm	0	0	0	0	-	-	-	-	-	-
QTL_2B.1	TraesCS2B03G0307500	101292215	101293655	Peroxidase	TraesCS2B01G125200	tpm	0	0	0	0	-	-	-	-	-	-
QTL_2B.1	TraesCS2B03G0307700	101304102	101305266	Peroxidase	TraesCS2B01G125300	tpm	2.01866	3.10952	0	0	-	-	-	-	-	-
QTL_2B.1	TraesCS2B03G0307900	101308818	101311233	Heat shock 70 kDa protein	TraesCS2B01G125400	tpm	0	0	0	0	-	-	-	-	-	-
QTL_2B.1	TraesCS2B03G0308100	101407245	101409264	Peroxidase	TraesCS2B01G125500	tpm	0	0.515981	0	0	-	-	-	-	-	-
QTL_2B.1	TraesCS2B03G0308200	101485451	101487298	Peroxidase	TraesCS2B01G125600	tpm	4.06043	3.55284	0	0	-	-	-	-	-	-
QTL_2B.1	TraesCS2B03G0308300	101536618	101538189	Peroxidase	TraesCS2B01G125700	tpm	0	0	0	0	-	-	-	-	-	-
QTL_2B.1	TraesCS2B03G0308400	101636498	101637963	Peroxidase	TraesCS2B01G125800	tpm	0	1.57122	0	0	-	-	-	-	-	-
QTL_2B.1	TraesCS2B03G0308600	101692151	101693942	Peroxidase	TraesCS2B01G125900	tpm	1.79345	0	0	0	-	-	-	-	-	-
QTL_2B.1	TraesCS2B03G0308700	101701110	101702289	Peroxidase	TraesCS2B01G126000	tpm	0	0	0	0	-	-	-	-	-	-
QTL_2B.1	TraesCS2B03G0309300	101803647	101805080	Peroxidase	TraesCS2B01G126100	tpm	0	0	0	0	-	-	-	-	-	-
QTL_2B.1	TraesCS2B03G0309400	101824299	101825750	Peroxidase	TraesCS2B01G126200	tpm	0	1.74443	0	0	-	-	-	-	-	-
QTL_2B.1	TraesCS2B03G0309500	101850684	101852501	Peroxidase	TraesCS2B01G126300	tpm	3.88502	2.45992	0	0	-	-	-	-	-	-
QTL_2B.1	TraesCS2B03G0305700	100594448	100596220	Peroxidase	TraesCS2B01G124300	tpm	3.64162	0.57373	0	0	-	-	-	-	-	-
QTL_2B.1	TraesCS2B03G0305800	100615733	100616185	Peroxidase	TraesCS2B01G124400	tpm	0	0	0	0	-	-	-	-	-	-
QTL_2B.1	TraesCS2B03G0306200	100714228	100714982	Peroxidase	TraesCS2B01G124500	tpm	0	0	0	0	-	-	-	-	-	-
QTL_2B.1	TraesCS2B03G0306300	100716949	100718353	Peroxidase	TraesCS2B01G124600	tpm	0	1.41207	0	0	-	-	-	-	-	-
QTL_2B.1	TraesCS2B03G0306700	100742977	100744469	Peroxidase	TraesCS2B01G124800	tpm	0	0.273034	0	0	-	-	-	-	-	-
QTL_2B.1	TraesCS2B03G0306900	101012192	101014080	Peroxidase	TraesCS2B01G124900	tpm	0.61088	0	0.286751	0	-	-	-	-	-	-
QTL_2B.1	TraesCS2B03G0323400	107086831	107092510	Divalent metal cation transporter MntH 2	TraesCS2B01G133000	tpm	0	1.37665	0.771209	0	-	-	-	-	-	-
QTL_2B.1	TraesCS2B03G0323600	107147552	107152378	Hippocampus abundant transcript-like protein 1	TraesCS2B01G133100	tpm	0	0	0	0	-	-	-	-	-	-
QTL_2B.1	TraesCS2B03G0324300	107343957	107346071	Rubber elongation factor family protein	TraesCS2B01G133200	tpm	0	2.06488	1.95787	3.47228	4.38997	4.71288	5.0518	5.02057	4.2213	NC
QTL_2B.1	TraesCS2B03G0324400	107347180	107355663	Protein arginine methyltransferase	TraesCS2B01G133300	tpm	4.26858	3.7289	4.085	2.83878	3.4212	2.40451	2.48383	2.52649	2.0637	DR
QTL_2B.1	TraesCS2B03G0324600	107538298	107539817	60S ribosome subunit biogenesis protein NIP7 homolog	TraesCS2B01G133400	tpm	0.486683	0.703895	1.05203	0	-	-	-	-	-	-
QTL_2B.1	TraesCS2B03G0324800	107546507	107547675	Photosystem I reaction center subunit N	TraesCS2B01G133500	tpm	0	5.65787	3.42578	2.44252	5.0504	3.46535	2.07564	0	2.14033	DR
QTL_2B.1	TraesCS2B03G0325000	107641012	107641317	Flowering-promoting factor 1-like protein 1	TraesCS2B01G133600	tpm	0	0	0	0	-	-	-	-	-	-
QTL_2B.1	TraesCS2B03G0325100	107646137	107646442	Flowering-promoting factor 1-like protein 1	TraesCS2B01G133700	tpm	0	0	0	0	-	-	-	-	-	-
QTL_2B.1	TraesCS2B03G0325300	107692167	107693671	Uveal autoantigen with coiled-coil domains and ankyrin repeats isoform 2	TraesCS2B01G133800	tpm	1.31276	0.906962	2.48176	0	-	-	-	-	-	-
QTL_2B.1	TraesCS2B03G0325400	107693425	107696992	Pentatricopeptide repeat-containing protein	TraesCS2B01G133900	tpm	0	0.328614	0	0	-	-	-	-	-	-
QTL_2B.1	TraesCS2B03G0325700	107707247	107708855	Fas-binding factor 1 homolog	TraesCS2B01G134000	tpm	0	0	0	0	-	-	-	-	-	-
QTL_2B.1	TraesCS2B03G0326000	107941292	107943363	Heavy metal transport/detoxification superfamily protein	TraesCS2B01G134100	tpm	0.00699451	0	0.231531	0.70869	3.2608	2.03709	0	0.496457	0	DR
QTL_2B.1	TraesCS2B03G0326100	107950641	107954668	GH3 family protein	TraesCS2B01G134200	tpm	0	0	0	0	-	-	-	-	-	-
QTL_2B.1	TraesCS2B03G0326300	107958171	107959291	40S ribosomal protein S21	TraesCS2B01G134300	tpm	2.8345	2.18541	2.12945	0	-	-	-	-	-	-
QTL_2B.1	TraesCS2B03G0323200	106855696	106856738	LURP-one-like protein	TraesCS2B01G132800	tpm	0	0	0	0	-	-	-	-	-	-
QTL_2B.1	TraesCS2B03G0323300	106856982	106869355	ATP-dependent zinc metalloprotease FtsH	TraesCS2B01G132900	tpm	5.67217	4.36458	4.45976	3.69292	4.53736	4.21437	3.76419	3.74563	4.72097	NC
QTL_3A.1	TraesCS3A03G0144100	41695368	41697865	Isoaspartyl peptidase/L-asparaginase	TraesCS3A01G067700	tpm	0	0	0.193532	0.726788	1.80264	2.04833	0	0	0	DR
QTL_3A.1	TraesCS3A03G0144200	41698761	41704222	F-box/LRR-repeat protein	TraesCS3A01G067800	tpm	2.90508	3.64839	2.63208	2.02599	2.37734	2.35962	4.1097	4.25756	4.86057	UR
QTL_3A.1	TraesCS3A03G0144700	41731311	41733479	Scarecrow transcription factor family protein	TraesCS3A01G067900	tpm	0	0	0	0	-	-	-	-	-	-
QTL_3A.1	TraesCS3A03G0144900	41743304	41745454	Scarecrow transcription factor family protein	TraesCS3A01G068000	tpm	0	0	0	0	-	-	-	-	-	-
QTL_3A.1	TraesCS3A03G0145000	41784646	41787027	tRNA N6-adenosine threonylcarbamoyltransferase	TraesCS3A01G068100	tpm	0.518485	1.10051	0	0.702108	2.62053	2.02978	2.08497	2.37912	2.33473	NC
QTL_3A.1	TraesCS3A03G0145300	41800734	41810703	Disease resistance protein (NBS-LRR class) family	TraesCS3A01G068200	tpm	2.42335	0.269256	0.206556	0	-	-	-	-	-	-
QTL_3A.1	TraesCS3A03G0145400	41817860	41819404	NBS-LRR disease resistance protein	TraesCS3A01G068300	tpm	1.31448	0	1.12495	0	-	-	-	-	-	-
QTL_3A.1	TraesCS3A03G0145900	41848258	41848678	GTPase Der	TraesCS3A01G068400	tpm	0	0	0	0	-	-	-	-	-	-
QTL_3A.1	TraesCS3A03G0146100	41918298	41921432	Disease resistance protein (NBS-LRR class) family	TraesCS3A01G068500	tpm	1.84478	3.83773	4.57667	0.46975	2.41606	1.15644	0	0	0	DR
QTL_3A.1	TraesCS3A03G0146300	41933559	41935850	NBS-LRR disease resistance protein	TraesCS3A01G068600	tpm	0	0	0	0	-	-	-	-	-	-
QTL_3A.1	TraesCS3A03G0146800	41987394	41990435	NBS-LRR disease resistance protein	TraesCS3A01G068700	tpm	1.64423	1.75542	1.51609	0	-	-	-	-	-	-
QTL_3A.1	TraesCS3A03G0146900	42019319	42022372	NBS-LRR disease resistance protein	TraesCS3A01G068800	tpm	0	0	0	0	-	-	-	-	-	-
QTL_3A.1	TraesCS3A03G0147000	42047671	42048726	NBS-LRR disease resistance protein	TraesCS3A01G068900	tpm	0.286408	0	0	0	-	-	-	-	-	-
QTL_3A.1	TraesCS3A03G0147200	42050263	42050922	Disease resistance protein (TIR-NBS-LRR class) family	TraesCS3A01G069000	tpm	1.71192	0	0	0	-	-	-	-	-	-
QTL_3A.1	TraesCS3A03G0148000	42106904	42107878	NBS-LRR disease resistance protein	TraesCS3A01G069100	tpm	0	0	0	0	-	-	-	-	-	-
QTL_3A.1	TraesCS3A03G0148300	42236617	42240575	Disease resistance protein (NBS-LRR class) family	TraesCS3A01G069200	tpm	0	3.55194	2.21107	0	-	-	-	-	-	-
QTL_3B.1	TraesCS3B03G0041800	13120457	13120807	Glutathione S-transferase T3	TraesCS3B01G018700	tpm	0	0	0	0	-	-	-	-	-	-
QTL_3B.1	TraesCS3B03G0042000	13140448	13146598	transmembrane protein	TraesCS3B01G018800	tpm	5.25737	1.97284	3.21504	2.58371	3.58029	3.41948	3.67279	3.21902	3.24683	NC
QTL_3B.1	TraesCS3B03G0042100	13150614	13151953	F-box protein PP2	TraesCS3B01G018900	tpm	0	0	0	0	-	-	-	-	-	-
QTL_3B.1	TraesCS3B03G0042200	13155850	13159257	Disease resistance protein (NBS-LRR class) family	TraesCS3B01G019000	tpm	0	0	0	0	-	-	-	-	-	-
QTL_3B.1	TraesCS3B03G0042400	13188801	13190896	Cytochrome P450, putative	TraesCS3B01G019100	tpm	0	0	0	0	-	-	-	-	-	-
QTL_3B.1	TraesCS3B03G0042500	13244270	13247808	RING/FYVE/PHD zinc finger superfamily protein	TraesCS3B01G019200	tpm	0.257997	0	0	0	-	-	-	-	-	-
QTL_3B.1	TraesCS3B03G0042700	13247846	13251928	Protein-lysine N-methyltransferase	TraesCS3B01G019300	tpm	3.32006	3.58253	3.92821	2.32407	3.52736	3.2007	3.46419	3.06919	2.94703	NC
QTL_3B.1	TraesCS3B03G0043500	13267715	13268552	DUF4228 domain protein	TraesCS3B01G019400	tpm	0	0	0	0	-	-	-	-	-	-
QTL_3B.1	TraesCS3B03G0044100	13452540	13459855	Eukaryotic translation initiation factor 3 subunit A	TraesCS3B01G019500	tpm	6.19384	6.18435	5.40227	2.60788	5.25891	4.71893	5.84697	5.93438	5.72851	NC
QTL_3B.1	TraesCS3B03G0044300	13602908	13607618	E3 ubiquitin-protein ligase	TraesCS3B01G019600	tpm	0	0	0	0	-	-	-	-	-	-
QTL_3B.1	TraesCS3B03G0044500	13617584	13618512	Myb/SANT-like DNA-binding domain protein	TraesCS3B01G019700	tpm	0	0	0	0	-	-	-	-	-	-
QTL_3B.1	TraesCS3B03G0044600	13624135	13625145	Transcription initiation factor IIE subunit beta	TraesCS3B01G019800	tpm	0	0	0	0	-	-	-	-	-	-
QTL_3B.1	TraesCS3B03G0045000	13638687	13641490	Sarcoplasmic reticulum histidine-rich calcium-binding protein, putative, expressed	TraesCS3B01G019900	tpm	4.85697	5.67079	5.092	4.82304	5.83263	6.64162	8.17824	8.07192	8.28894	UR
QTL_3B.1	TraesCS3B03G0045200	13651284	13654171	Terpene synthase, putative	TraesCS3B01G020000	tpm	0	0	0	0	-	-	-	-	-	-
QTL_3B.1	TraesCS3B03G0045900	13743583	13744821	Transcription initiation factor IIE subunit beta	TraesCS3B01G020100	tpm	0	0	0	0	-	-	-	-	-	-
QTL_3B.1	TraesCS3B03G0046100	13753742	13756833	Ferredoxin reductase-like protein	TraesCS3B01G020200	tpm	2.11878	1.6179	1.54706	0	-	-	-	-	-	-
QTL_3B.1	TraesCS3B03G0046200	13794541	13796737	Pectin lyase-like superfamily protein	TraesCS3B01G020300	tpm	1.66941	0	0	0	-	-	-	-	-	-
QTL_3B.1	TraesCS3B03G0046600	13842867	13847314	tRNA (Adenine(58)-N(1))-methyltransferase non-catalytic subunit trm6	TraesCS3B01G020400	tpm	1.68017	0.914379	0	0	-	-	-	-	-	-
QTL_3B.1	TraesCS3B03G0046900	13889123	13890558	PAP fibrillin domain containing protein,expressed	TraesCS3B01G020500	tpm	0	0	0	0	-	-	-	-	-	-
QTL_3B.1	TraesCS3B03G0047100	13894018	13894831	Myb/SANT-like DNA-binding domain protein	TraesCS3B01G020600	tpm	0	0	0	0	-	-	-	-	-	-
QTL_3B.1	TraesCS3B03G0047200	13900782	13902099	PAP fibrillin domain containing protein,expressed	TraesCS3B01G020700	tpm	0	0.750535	0	0	-	-	-	-	-	-
QTL_3B.1	TraesCS3B03G0047300	13904992	13908357	Alanine--tRNA ligase	TraesCS3B01G020800	tpm	2.05007	2.61909	1.38417	0.547065	1.3434	1.35006	2.41304	2.27839	1.77624	NC
QTL_3B.1	TraesCS3B03G0047500	13908853	13909704	APOLLO	TraesCS3B01G020900	tpm	0	0	0	0	-	-	-	-	-	-
QTL_3B.1	TraesCS3B03G0047600	13912323	13919989	Leucine--tRNA ligase	TraesCS3B01G021000	tpm	1.35397	4.22862	3.85597	0	-	-	-	-	-	-
QTL_3B.1	TraesCS3B03G0047700	13920909	13922384	Glycosyltransferase	TraesCS3B01G021100	tpm	0.0481664	0.201371	3.23085	0	-	-	-	-	-	-
QTL_3B.1	TraesCS3B03G0047800	13924243	13934714	Protein kinase family protein	TraesCS3B01G021200	tpm	1.1376	0	0	0	-	-	-	-	-	-
QTL_3B.2	TraesCS3B03G0210800	70749511	70755077	Polyadenylate-binding protein	TraesCS3B01G090800	tpm	0	0	0	0	-	-	-	-	-	-
QTL_3B.2	TraesCS3B03G0211100	70961009	70967169	Cellulose synthase-like protein	TraesCS3B01G090900	tpm	0.660427	1.61113	2.95109	0.450813	3.02544	3.10495	3.24393	2.60418	2.2675	NC
QTL_3B.2	TraesCS3B03G0211800	71137141	71140927	BTB/POZ domain containing protein, expressed	TraesCS3B01G091000	tpm	0.894542	0.468159	1.15949	0	-	-	-	-	-	-
QTL_3B.2	TraesCS3B03G0211900	71241502	71245146	K-stimulated pyrophosphate-energized sodium pump protein	TraesCS3B01G091100	tpm	2.33954	3.33005	2.78818	2.9127	3.05129	4.19621	5.54391	5.98849	5.83274	UR
QTL_3B.2	TraesCS3B03G0212000	71245301	71252716	Fatty acid oxidation complex subunit alpha	TraesCS3B01G091200	tpm	6.22303	5.73954	4.96314	2.56516	3.66797	3.5993	4.35633	4.36032	4.76298	UR
QTL_3B.2	TraesCS3B03G0212300	71261628	71263025	Cortactin-binding protein 2	TraesCS3B01G091300	tpm	0	0	0	0	-	-	-	-	-	-
QTL_3B.2	TraesCS3B03G0212700	71368151	71370982	Cytochrome P450 family protein, expressed	TraesCS3B01G091400	tpm	0	0	0	0	-	-	-	-	-	-
QTL_3B.2	TraesCS3B03G0213000	71551456	71553281	DDT domain superfamily	TraesCS3B01G091500	tpm	0	0	0	0	-	-	-	-	-	-
QTL_3B.2	TraesCS3B03G0213600	71632383	71633142	F-box protein	TraesCS3B01G091600	tpm	0	0	0	0	-	-	-	-	-	-
QTL_3B.2	TraesCS3B03G0213900	71644734	71645525	CsAtPR5	TraesCS3B01G091700	tpm	0	0	0	0	-	-	-	-	-	-
QTL_3B.2	TraesCS3B03G0214500	71866735	71871474	Short-chain dehydrogenase/reductase family protein	TraesCS3B01G091800	tpm	0	3.19017	4.88264	4.20377	5.63943	4.78621	2.36415	0.0821932	1.66554	DR
QTL_3B.2	TraesCS3B03G0215000	72049871	72054119	XH/XS domain-containing protein	TraesCS3B01G091900	tpm	0	0	0	0	-	-	-	-	-	-
QTL_3B.2	TraesCS3B03G0215100	72100246	72100884	XH/XS domain-containing protein	TraesCS3B01G092000	tpm	0	0	0	0	-	-	-	-	-	-
QTL_3B.2	TraesCS3B03G0215200	72129978	72130525	DNA topoisomerase	TraesCS3B01G092100	tpm	0	0	0	0	-	-	-	-	-	-
QTL_3B.2	TraesCS3B03G0177500	59146433	59146995	Cysteine proteinase inhibitor	TraesCS3B01G077600	tpm	0	0	0	4.82679	6.7156	1.72472	0	0	0	DR
QTL_3B.2	TraesCS3B03G0177700	59185749	59186927	F-box family protein	TraesCS3B01G077700	tpm	0	0	0	0	-	-	-	-	-	-
QTL_3B.2	TraesCS3B03G0177800	59263230	59265253	F-box domain containing protein, expressed	TraesCS3B01G077800	tpm	0	0	0	0	-	-	-	-	-	-
QTL_3B.2	TraesCS3B03G0177900	59361777	59365343	Inorganic pyrophosphatase	TraesCS3B01G077900	tpm	3.90297	4.94711	3.17799	5.2701	6.2048	5.9319	4.83418	4.94987	5.81598	NC
QTL_3B.2	TraesCS3B03G0178700	59590479	59592733	CsAtPR5	TraesCS3B01G078000	tpm	0	0	0	0	-	-	-	-	-	-
QTL_3B.2	TraesCS3B03G0178800	59625771	59627640	RNA exonuclease 4	TraesCS3B01G078100	tpm	0	0	0	0	-	-	-	-	-	-
QTL_3B.3	TraesCS3B03G0617900	385143559	385147567	basic helix-loop-helix (bHLH) DNA-binding superfamily protein	TraesCS3B01G236900	tpm	2.1744	1.27459	0	0	-	-	-	-	-	-
QTL_3B.3	TraesCS3B03G0617400	384938337	384945716	Protein ROOT HAIR DEFECTIVE 3 homolog	TraesCS3B01G237000	tpm	6.19896	6.28199	6.10522	4.76725	5.28619	4.70445	4.59359	4.45291	4.79406	NC
QTL_3B.3	TraesCS3B03G0628300	390836313	390837179	ATP binding microtubule motor family protein	TraesCS3B01G240700	tpm	0	0	0	0	-	-	-	-	-	-
QTL_3B.3	TraesCS3B03G0628400	390838344	390842893	bZIP transcription factor (DUF630 and DUF632)	TraesCS3B01G240800	tpm	3.57455	3.34979	4.38416	2.61096	2.99785	3.00665	2.77795	2.11948	1.73933	DR
QTL_3B.3	TraesCS3B03G0628500	391151616	391159030	Serine/threonine-protein phosphatase 6 regulatory subunit 3	TraesCS3B01G240900	tpm	5.08758	4.58125	5.11929	2.92839	3.58774	3.13941	2.96552	2.70281	3.21631	NC
QTL_3B.3	TraesCS3B03G0598400	364898957	364901748	Exocyst complex component SEC15B	TraesCS3B01G232000	tpm	4.12167	3.42478	4.21632	1.62312	2.4607	2.02768	2.06845	1.7348	2.35954	NC
QTL_3B.3	TraesCS3B03G0625600	389376333	389378411	Hydroxyproline-rich glycoprotein family protein, putative	TraesCS3B01G239800	tpm	0.96089	0.505415	0.057679	0	-	-	-	-	-	-
QTL_3B.3	TraesCS3B03G0626400	389626386	389629052	Zinc finger RNA-binding protein	TraesCS3B01G239900	tpm	3.45022	3.01381	2.11195	2.48163	2.57017	1.46632	2.44283	2.53694	2.2859	NC
QTL_3B.3	TraesCS3B03G0626600	389853375	389858213	Protein phosphatase 2C	TraesCS3B01G240000	tpm	3.61407	3.03531	4.13281	2.13146	2.74623	2.21886	3.73107	3.88396	3.26921	NC
QTL_3B.3	TraesCS3B03G0626700	389886728	389889440	Basic helix-loop-helix (BHLH) DNA-binding superfamily	TraesCS3B01G240100	tpm	5.01869	4.58088	7.213	2.1743	4.05167	3.13426	5.02978	4.98634	4.44447	NC
QTL_3B.3	TraesCS3B03G0627000	390335147	390336362	WRKY transcription factor	TraesCS3B01G240200	tpm	0	0	0	0	-	-	-	-	-	-
QTL_3B.4	TraesCS3B03G0969500	624804326	624807169	ABC transporter G family member	TraesCS3B01G387500	tpm	0.256636	0	0	0	-	-	-	-	-	-
QTL_3B.4	TraesCS3B03G0969900	625219553	625222673	Signal peptidase subunit-12	TraesCS3B01G387600	tpm	1.14298	0.931101	0.557278	1.63867	3.05829	2.42719	2.13526	2.30024	1.33277	DR
QTL_3B.4	TraesCS3B03G0970300	625491556	625492916	Membrane-associated kinase regulator-like protein, putative	TraesCS3B01G387700	tpm	0	0	0	0	-	-	-	-	-	-
QTL_3B.4	TraesCS3B03G0970400	625495846	625499622	Ankyrin repeat-containing protein	TraesCS3B01G387800	tpm	5.56826	3.68613	3.71303	2.40146	3.31785	2.77376	3.38126	2.61159	2.54882	NC
QTL_3B.4	TraesCS3B03G0970500	625530248	625531880	Pectate lyase	TraesCS3B01G387900	tpm	0	0	0	0	-	-	-	-	-	-
QTL_3B.4	TraesCS3B03G0970700	625553331	625556939	Alpha/beta-Hydrolases superfamily protein	TraesCS3B01G388000	tpm	0.895062	0	0	0	-	-	-	-	-	-
QTL_3B.5	TraesCS3B03G1231300	756815955	756817844	Histone-lysine N-methyltransferase	TraesCS3B01G498100	tpm	0	0	0	0	-	-	-	-	-	-
QTL_3B.5	TraesCS3B03G1231400	756959527	756965633	Potassium transporter	TraesCS3B01G498200	tpm	1.71865	2.57342	2.72786	0.993848	1.36826	0.638136	1.11094	1.17244	1.51231	NC
QTL_3B.5	TraesCS3B03G1231500	756965957	756972020	Spermatogenesis-associated protein 20	TraesCS3B01G498300	tpm	2.0652	1.69731	1.90678	1.05183	2.79573	4.29718	5.6972	6.62813	6.20712	UR
QTL_3B.5	TraesCS3B03G1231600	757069831	757071399	F-box-like protein	TraesCS3B01G498400	tpm	0	0	0	0	-	-	-	-	-	-
QTL_3B.5	TraesCS3B03G1232200	757212208	757213541	Zinc finger E-box-binding homeobox 1	TraesCS3B01G498500	tpm	0.391361	0	0	0	-	-	-	-	-	-
QTL_3B.5	TraesCS3B03G1232300	757220787	757221950	F-box-like protein	TraesCS3B01G498600	tpm	0	0	0	0	-	-	-	-	-	-
QTL_3B.5	TraesCS3B03G1232500	757281692	757282761	COX3 mRNA-specific translational activator PET494	TraesCS3B01G498700	tpm	0	0	0	2.2559	2.56367	0	0	0	0	DR
QTL_3B.5	TraesCS3B03G1232700	757294294	757297711	Regulator of Vps4 activity in the MVB pathway protein	TraesCS3B01G498800	tpm	4.48421	4.65899	5.23714	3.44115	3.46089	2.85155	2.77062	2.35257	1.98244	DR
QTL_3B.5	TraesCS3B03G1232900	757373291	757379877	Leucine-rich repeat receptor-like protein kinase family protein	TraesCS3B01G498900	tpm	0	0.699728	1.12506	0	-	-	-	-	-	-
QTL_3B.5	TraesCS3B03G1233100	757569287	757570725	Amino acid transporter, putative	TraesCS3B01G499000	tpm	0	0	0	0	-	-	-	-	-	-
QTL_3D.1	TraesCS3D03G1032300	572489379	572495806	NBS-LRR disease resistance protein-like	TraesCS3D01G468800	tpm	3.14911	0	0	0	-	-	-	-	-	-
QTL_3D.1	TraesCS3D03G1032400	572564600	572567465	F-box protein (DUF295)	TraesCS3D01G468900	tpm	0	0	0	0	-	-	-	-	-	-
QTL_3D.1	TraesCS3D03G1032500	572568446	572569228	Periplasmic nitrate reductase	TraesCS3D01G469000	tpm	0	0	0	0	-	-	-	-	-	-
QTL_3D.1	TraesCS3D03G1032900	572592420	572597367	NBS-LRR disease resistance protein	TraesCS3D01G469100	tpm	0.973895	0.576108	2.56379	0	-	-	-	-	-	-
QTL_3D.1	TraesCS3D03G1033200	572717171	572732446	Disease resistance protein (NBS-LRR class) family	TraesCS3D01G469200	tpm	3.78651	0.974684	0	0	-	-	-	-	-	-
QTL_3D.1	TraesCS3D03G1033800	572848516	572858571	NBS-LRR disease resistance protein-like	TraesCS3D01G469300	tpm	1.04251	0	0	0	-	-	-	-	-	-
QTL_3D.1	TraesCS3D03G1033900	572868020	572869634	F-box protein	TraesCS3D01G469400	tpm	0	0	0	0	-	-	-	-	-	-
QTL_3D.1	TraesCS3D03G1034500	572915381	572926833	Disease resistance protein (NBS-LRR class) family	TraesCS3D01G469500	tpm	0	0	0	0	-	-	-	-	-	-
QTL_3D.1	TraesCS3D03G1034600	572950935	572951321	Rpl2	TraesCS3D01G469600	tpm	0	0	0	0	-	-	-	-	-	-
QTL_3D.1	TraesCS3D03G1034700	572950957	572951454	50S ribosomal protein L2	TraesCS3D01G469700	tpm	0	0	0	0	-	-	-	-	-	-
QTL_3D.1	TraesCS3D03G1034800	572951471	572952082	Photosystem II reaction center protein I	TraesCS3D01G469800	tpm	0	0	0	0	-	-	-	-	-	-
QTL_3D.1	TraesCS3D03G1035000	573036157	573036624	F-box protein	TraesCS3D01G469900	tpm	0	0	0	0	-	-	-	-	-	-
QTL_3D.1	TraesCS3D03G1035400	573179170	573180027	Hydroxyproline-rich glycoprotein	TraesCS3D01G470000	tpm	0	0	0	0	-	-	-	-	-	-
QTL_4A.1	TraesCS4A03G0658100	561304129	561304924	pumilio 2	TraesCS4A01G250700	tpm	0	0	0	0	-	-	-	-	-	-
QTL_4A.1	TraesCS4A03G0658200	561305165	561309691	Endoplasmic reticulum oxidoreductin-1	TraesCS4A01G250800	tpm	6.05826	2.74209	3.95234	6.97527	6.18403	6.45133	5.20625	5.1881	4.20262	DR
QTL_4A.1	TraesCS4A03G0658300	561313104	561314882	Dehydrin	TraesCS4A01G250900	tpm	0	0	0	1.91875	1.62257	4.82619	6.62664	7.37117	5.61347	UR
QTL_4A.1	TraesCS4A03G0658700	561431644	561437532	Pollen Ole e 1 allergen/extensin	TraesCS4A01G251100	tpm	2.35487	0.173814	2.77379	0	-	-	-	-	-	-
QTL_4A.1	TraesCS4A03G0659100	561481340	561482715	Pathogenesis-related protein 1	TraesCS4A01G251300	tpm	0.415651	0	1.86348	0	-	-	-	-	-	-
QTL_4A.1	TraesCS4A03G0659200	561505992	561508268	Kinase, putative	TraesCS4A01G251400	tpm	0	0	0	0	-	-	-	-	-	-
QTL_4A.1	TraesCS4A03G0659600	561595682	561596377	Protein MIZU-KUSSEI 1	TraesCS4A01G251500	tpm	0	0	0	0	-	-	-	-	-	-
QTL_4A.1	TraesCS4A03G0663800	564300093	564303624	Cathepsin B-like cysteine protease	TraesCS4A01G252900	tpm	3.47534	3.99124	3.82244	0	-	-	-	-	-	-
QTL_4A.1	TraesCS4A03G0663900	564304121	564315707	Leishmanolysin-like peptidase	TraesCS4A01G253000	tpm	4.10519	3.48389	4.53229	3.04234	3.31082	3.12158	2.74686	2.6106	2.73466	NC
QTL_4A.1	TraesCS4A03G0664500	564427390	564428562	F-box protein	TraesCS4A01G253100	tpm	0	0	0	0	-	-	-	-	-	-
QTL_4A.1	TraesCS4A03G0664600	564429133	564430412	Photosystem I reaction center subunit N	TraesCS4A01G253200	tpm	0	4.82892	4.12796	1.61248	2.3668	0.633058	0	0	0	DR
QTL_4A.1	TraesCS4A03G0664700	564430834	564432063	Photosystem I reaction center subunit N	TraesCS4A01G253300	tpm	0	2.12277	0	1.79253	1.06746	0	0	0	0.0827843	NC
QTL_4A.1	TraesCS4A03G0664800	564432258	564435082	Core-2/I-branching beta-1,6-N-acetylglucosaminyltransferase family protein	TraesCS4A01G253400	tpm	2.85807	3.35082	4.3029	1.52947	2.23224	1.3555	1.60662	1.5155	1.7226	NC
QTL_4A.1	TraesCS4A03G0664900	564694405	564720698	Calcium-transporting ATPase	TraesCS4A01G253500	tpm	3.56651	2.95356	3.25704	1.25729	2.58997	2.89138	2.61673	2.7966	2.93104	NC
QTL_4A.1	TraesCS4A03G0665000	564726966	564736358	Serine carboxypeptidase family protein, expressed	TraesCS4A01G253600	tpm	4.96974	2.95779	0.838353	0	-	-	-	-	-	-
QTL_4A.1	TraesCS4A03G0665100	564741201	564744833	Serine carboxypeptidase family protein, expressed	TraesCS4A01G253700	tpm	3.38892	1.57208	4.2131	1.28328	1.94759	1.58853	2.32521	0	0	DR
QTL_4A.1	TraesCS4A03G0665200	564752784	564756372	Serine carboxypeptidase family protein, expressed	TraesCS4A01G253800	tpm	2.30749	2.20787	0	0	-	-	-	-	-	-
QTL_4A.1	TraesCS4A03G0665900	564835209	564838264	Lecithin-cholesterol acyltransferase-like 1	TraesCS4A01G253900	tpm	0	0	0.929382	0	-	-	-	-	-	-
QTL_4A.1	TraesCS4A03G0668200	566168552	566172679	Growth-regulating factor	TraesCS4A01G255000	tpm	2.08195	0.227942	0.50173	0	-	-	-	-	-	-
QTL_4A.1	TraesCS4A03G0668400	566180035	566180304	B3 domain-containing protein	TraesCS4A01G255100	tpm	0	0	0	0	-	-	-	-	-	-
QTL_4A.1	TraesCS4A03G0668800	566456655	566457607	Imidazole glycerol phosphate synthase subunit HisH	TraesCS4A01G255200	tpm	0	0	0	0	-	-	-	-	-	-
QTL_4A.1	TraesCS4A03G0668900	566462127	566467961	Ribosomal RNA small subunit methyltransferase E	TraesCS4A01G255300	tpm	0	0	0	0	-	-	-	-	-	-
QTL_4A.1	TraesCS4A03G0669100	566465188	566468175	Serine/threonine-protein kinase	TraesCS4A01G255400	tpm	2.60383	0	0	0	-	-	-	-	-	-
QTL_4A.1	TraesCS4A03G0669200	566469977	566474052	Thioredoxin-like protein AAED1, chloroplastic	TraesCS4A01G255500	tpm	0	2.18437	0.777687	0	-	-	-	-	-	-
QTL_4A.1	TraesCS4A03G0669300	566474981	566478770	transmembrane protein	TraesCS4A01G255600	tpm	0.579798	3.43436	2.11178	0.411502	1.21537	0	0.424327	0.00400369	0.500407	NC
QTL_4A.1	TraesCS4A03G0669400	566478528	566481245	ethylene-dependent gravitropism-deficient and yellow-green-like 2	TraesCS4A01G255700	tpm	0	0.831856	0	0	-	-	-	-	-	-
QTL_4A.1	TraesCS4A03G0669500	566636273	566639224	basic helix-loop-helix (bHLH) DNA-binding superfamily protein	TraesCS4A01G255800	tpm	3.62864	0	0.465772	0	-	-	-	-	-	-
QTL_4A.1	TraesCS4A03G0669600	566652858	566661307	ATP dependent RNA helicase	TraesCS4A01G255900	tpm	3.7729	2.97157	2.45091	0.963874	2.12217	1.34524	3.06414	3.55145	3.69754	UR
QTL_4A.1	TraesCS4A03G0669700	566661494	566664342	tRNA pseudouridine synthase	TraesCS4A01G256000	tpm	0.482621	0.507401	0.51165	0	-	-	-	-	-	-
QTL_4A.1	TraesCS4A03G0670100	566668459	566670905	Pentatricopeptide repeat-containing protein	TraesCS4A01G256100	tpm	0	0	0	0	-	-	-	-	-	-
QTL_4A.1	TraesCS4A03G0670200	566671546	566677057	Chaperone protein DnaJ	TraesCS4A01G256200	tpm	3.60144	3.18154	3.20324	2.58036	2.89053	2.95827	3.53576	3.58124	3.99257	UR
QTL_4A.1	TraesCS4A03G0670300	566681301	566689417	GTPase obg	TraesCS4A01G256300	tpm	2.83988	2.84384	2.39374	0.668655	2.21487	1.94558	3.77138	4.01377	4.45277	UR
QTL_4A.1	TraesCS4A03G0670400	566691709	566693475	F-box family protein	TraesCS4A01G256400	tpm	0	0	0	0	-	-	-	-	-	-
QTL_4A.1	TraesCS4A03G0672200	569159034	569160331	pleiotropic drug resistance 13	TraesCS4A01G257300	tpm	0	0	0	0	-	-	-	-	-	-
QTL_4A.1	TraesCS4A03G0672300	569230569	569236104	Sulfite exporter TauE/SafE family protein	TraesCS4A01G257400	tpm	1.82209	3.96734	4.8952	0	-	-	-	-	-	-
QTL_4A.1	TraesCS4A03G0672400	569236838	569239724	myb-like protein X	TraesCS4A01G257500	tpm	5.10868	4.2509	4.59616	2.28586	2.40041	2.1907	3.41652	3.05393	3.25668	NC
QTL_4A.1	TraesCS4A03G0672900	569428584	569432928	ERD (Early-responsive to dehydration stress) family protein	TraesCS4A01G257600	tpm	0	0	0	0	-	-	-	-	-	-
QTL_4A.1	TraesCS4A03G0673000	569433939	569439697	Inositol-tetrakisphosphate 1-kinase	TraesCS4A01G257700	tpm	3.92638	3.39443	2.19934	3.09939	2.6835	2.95088	2.74986	2.543	3.72197	UR
QTL_4A.1	TraesCS4A03G0673100	569445438	569448539	Tubulin alpha chain	TraesCS4A01G257800	tpm	8.05498	7.9706	9.79493	7.65294	7.42481	6.58754	5.50654	3.89172	3.36549	DR
QTL_4A.1	TraesCS4A03G0673500	569874619	569877112	basic helix-loop-helix (bHLH) DNA-binding superfamily protein	TraesCS4A01G257900	tpm	6.71912	1.06138	0	0	-	-	-	-	-	-
QTL_4A.1	TraesCS4A03G0673600	569937019	569943049	WD repeat-containing protein	TraesCS4A01G258000	tpm	1.72877	1.19137	0	1.45342	1.62904	1.04843	1.28366	1.90801	0.81583	NC
QTL_4A.1	TraesCS4A03G0673700	569945284	569949756	Lariat debranching enzyme	TraesCS4A01G258100	tpm	2.9418	2.18845	1.13036	1.03035	1.2005	0.868413	1.15447	1.59299	2.80919	UR
QTL_4A.2	TraesCS4A03G0739000	592743998	592749526	Homeobox protein BEL1 like	TraesCS4A01G289400	tpm	3.18665	4.36991	4.71378	2.82975	3.3841	2.15205	2.02389	1.51032	1.58604	DR
QTL_4A.2	TraesCS4A03G0739100	592831928	592834179	BEL1-like homeodomain protein	TraesCS4A01G289500	tpm	0	0	0	0	-	-	-	-	-	-
QTL_4A.2	TraesCS4A03G0739200	592834891	592839687	Ankyrin repeat family protein	TraesCS4A01G289600	tpm	1.59548	0	1.10153	0	-	-	-	-	-	-
QTL_4A.2	TraesCS4A03G0739400	592857477	592863658	Ankyrin repeat family protein	TraesCS4A01G289700	tpm	0	0	2.36305	0	-	-	-	-	-	-
QTL_4A.2	TraesCS4A03G0739500	592868582	592869981	Leucine-rich repeat-containing protein 40	TraesCS4A01G289800	tpm	0	0	0	0	-	-	-	-	-	-
QTL_4A.2	TraesCS4A03G0739700	592958668	592967423	Ankyrin repeat protein-like	TraesCS4A01G289900	tpm	0	0	2.46004	0.623108	1.35769	1.10073	1.41984	1.14156	2.12193	NC
QTL_4A.2	TraesCS4A03G0739800	592969385	592976187	Ankyrin repeat family protein	TraesCS4A01G290000	tpm	0	0	0.167897	0	-	-	-	-	-	-
QTL_4A.2	TraesCS4A03G0739900	592978560	592988682	Ankyrin repeat protein-like	TraesCS4A01G290100	tpm	1.08792	1.49385	3.23477	1.98558	2.36978	1.5723	1.32653	0.648422	0.563377	DR
QTL_4A.2	TraesCS4A03G0740000	592990369	592995577	Ankyrin repeat family protein	TraesCS4A01G290200	tpm	4.31759	4.4832	4.56276	3.20139	3.60148	3.04198	4.10398	4.17724	3.84519	NC
QTL_4A.2	TraesCS4A03G0740100	593008429	593014502	Ankyrin repeat family protein	TraesCS4A01G290300	tpm	0	0	2.32265	1.29138	1.83629	1.68589	2.67447	3.3093	3.51119	UR
QTL_4A.2	TraesCS4A03G0740400	593037814	593041425	Phosphomethylpyrimidine synthase	TraesCS4A01G290400	tpm	4.79768	5.59388	2.05562	2.45387	3.05965	2.59118	1.18627	0.113128	0.581131	DR
QTL_4A.2	TraesCS4A03G0740700	593093393	593094709	Hexosyltransferase	TraesCS4A01G290500	tpm	0	0	0	0	-	-	-	-	-	-
QTL_4A.2	TraesCS4A03G0740800	593106940	593109195	E3 ubiquitin-protein ligase	TraesCS4A01G290600	tpm	2.65826	1.83273	2.18083	4.48077	4.4004	4.81072	3.95958	4.13578	3.05295	DR
QTL_4A.2	TraesCS4A03G0741100	593174396	593175381	AGAMOUS-like MADS-box transcription factor	TraesCS4A01G290700	tpm	0	0	0	0	-	-	-	-	-	-
QTL_4A.2	TraesCS4A03G0741200	593187323	593187984	VQ motif-containing protein	TraesCS4A01G290800	tpm	0	0	0	0	-	-	-	-	-	-
QTL_4A.2	TraesCS4A03G0741300	593189940	593190850	Glycine-rich protein	TraesCS4A01G290900	tpm	0	0	0.973075	2.81851	5.80705	5.7859	5.76709	0.486172	0	DR
QTL_4A.2	TraesCS4A03G0741400	593201293	593202480	Thymocyte nuclear protein 1	TraesCS4A01G291000	tpm	0	0	0	0	-	-	-	-	-	-
QTL_4A.2	TraesCS4A03G0741800	593215840	593216599	myosin XI D	TraesCS4A01G291100	tpm	0	0	0	0	-	-	-	-	-	-
QTL_4A.2	TraesCS4A03G0741900	593250901	593251411	BZIP transcription factor	TraesCS4A01G291200	tpm	0	0	0	0	-	-	-	-	-	-
QTL_4A.2	TraesCS4A03G0742000	593264586	593265872	Neuropeptide Y receptor type 1	TraesCS4A01G291300	tpm	0	0	0	0	-	-	-	-	-	-
QTL_4A.2	TraesCS4A03G0742200	593282909	593283579	Fasciclin-like arabinogalactan protein 16	TraesCS4A01G291400	tpm	0	0	0	0	-	-	-	-	-	-
QTL_4A.2	TraesCS4A03G0742300	593355091	593357795	Growth-regulating factor	TraesCS4A01G291500	tpm	1.38916	1.82546	2.68367	0	-	-	-	-	-	-
QTL_4A.2	TraesCS4A03G0742500	593484250	593489449	DUF21 domain-containing protein	TraesCS4A01G291600	tpm	2.33169	2.31682	4.09639	2.43388	2.64139	2.57021	5.01713	5.51125	6.01725	UR
QTL_4A.2	TraesCS4A03G0742600	593500655	593507173	ERD (Early-responsive to dehydration stress) family protein	TraesCS4A01G291700	tpm	4.46719	4.65901	5.8646	2.7781	3.29769	2.82704	2.34085	1.09787	0.813463	DR
QTL_4A.2	TraesCS4A03G0742900	593520866	593521405	double-stranded-RNA-binding protein 4	TraesCS4A01G291800	tpm	0	0	0	0	-	-	-	-	-	-
QTL_4A.2	TraesCS4A03G0743000	593526921	593531905	homeobox-1	TraesCS4A01G291900	tpm	0	0	0	0	-	-	-	-	-	-
QTL_4A.2	TraesCS4A03G0743100	593550288	593551772	Homeobox transcription factor KN2	TraesCS4A01G292000	tpm	0	0	0	0	-	-	-	-	-	-
QTL_4A.2	TraesCS4A03G0743200	593557126	593562374	homeobox-1	TraesCS4A01G292100	tpm	0	0	0	0	-	-	-	-	-	-
QTL_4A.2	TraesCS4A03G0738700	592563830	592564777	F-box domain containing protein	TraesCS4A01G289100	tpm	0	0	0	0	-	-	-	-	-	-
QTL_4A.2	TraesCS4A03G0738800	592566030	592584669	Golgi-body localization protein domain isoform 1	TraesCS4A01G289200	tpm	3.75596	3.64813	4.19457	1.44544	3.46957	3.08421	2.76652	2.52671	3.15325	NC
QTL_4A.2	TraesCS4A03G0738900	592592441	592596774	Serine/arginine rich splicing factor, putative	TraesCS4A01G289300	tpm	3.88275	2.87812	4.04468	4.55012	4.35992	4.05787	4.02753	4.27875	4.0325	NC
QTL_4A.3	TraesCS4A03G1111800	718573125	718574416	Protein kinase family protein	TraesCS4A01G444100	tpm	0	0	0	0	-	-	-	-	-	-
QTL_4A.3	TraesCS4A03G1111600	718564066	718566445	WD40-repeat-containing domain-containing protein	TraesCS4A01G444200	tpm	0.970935	1.90368	1.09348	0	-	-	-	-	-	-
QTL_4A.3	TraesCS4A03G1111500	718550928	718560010	Phosphoglucan, water dikinase	TraesCS4A01G444300	tpm	2.23261	3.69473	2.39163	1.37825	2.43319	2.16526	2.24727	2.04048	2.17411	NC
QTL_4A.3	TraesCS4A03G1111300	718544256	718544519	auxin transport protein (BIG)	TraesCS4A01G444400	tpm	0	0	0	0	-	-	-	-	-	-
QTL_4A.3	TraesCS4A03G1111000	718506726	718510049	Haloacid dehalogenase-like hydrolase domain-containing protein 3	TraesCS4A01G444500	tpm	2.32217	3.34927	2.73917	0.683109	0	0	0	0	0	NC
QTL_4A.3	TraesCS4A03G1110800	718469190	718470070	Haloacid dehalogenase-like hydrolase domain-containing protein 3	TraesCS4A01G444600	tpm	0	0	0	0	-	-	-	-	-	-
QTL_4A.3	TraesCS4A03G1110300	718409950	718411095	Disease resistance protein (NBS-LRR class) family	TraesCS4A01G444700	tpm	0.0375087	0	0	0	-	-	-	-	-	-
QTL_4A.3	TraesCS4A03G1110200	718408482	718409618	NBS-LRR disease resistance protein, putative, expressed	TraesCS4A01G444800	tpm	0.23228	0	0	0	-	-	-	-	-	-
QTL_4A.3	TraesCS4A03G1110100	718390556	718393717	NBS-LRR disease resistance protein, putative, expressed	TraesCS4A01G444900	tpm	0.0472033	0	0	0	-	-	-	-	-	-
QTL_4B.1	TraesCS4B03G0012400	5318530	5319996	NBS-LRR disease resistance protein-like protein	TraesCS4B01G006300	tpm	0	1.33958	1.1146	0	-	-	-	-	-	-
QTL_4B.1	TraesCS4B03G0012500	5320101	5321234	NBS-LRR disease resistance protein-like protein	TraesCS4B01G006400	tpm	0	1.22861	1.41709	0	-	-	-	-	-	-
QTL_4B.1	TraesCS4B03G0014600	6029853	6032274	Hexosyltransferase	TraesCS4B01G009000	tpm	0	0	0	0	-	-	-	-	-	-
QTL_4B.1	TraesCS4B03G0014100	5878408	5881448	Helicase-like protein	TraesCS4B01G009100	tpm	0	2.35289	2.059	0	-	-	-	-	-	-
QTL_4B.1	TraesCS4B03G0013900	5803248	5807228	Copper ion-binding protein	TraesCS4B01G009200	tpm	3.76394	3.95638	3.74777	4.18772	4.7958	4.36842	4.57632	4.93952	4.37934	NC
QTL_4B.1	TraesCS4B03G0013700	5784701	5785668	Dirigent protein	TraesCS4B01G009300	tpm	0	2.08929	1.50033	0	-	-	-	-	-	-
QTL_4B.1	TraesCS4B03G0013600	5779687	5781436	Protein O-linked-mannose beta-1,4-N-acetylglucosaminyltransferase 2	TraesCS4B01G009400	tpm	0.209091	0	0	0	-	-	-	-	-	-
QTL_4B.1	TraesCS4B03G0013500	5772706	5776139	Receptor protein kinase, putative	TraesCS4B01G009500	tpm	0	0	0	0	-	-	-	-	-	-
QTL_4B.1	TraesCS4B03G0013400	5753494	5754438	Chlorophyllase	TraesCS4B01G009600	tpm	0	0	0	0	-	-	-	-	-	-
QTL_4B.1	TraesCS4B03G0013300	5730119	5731654	Cytochrome P450 family protein, expressed	TraesCS4B01G009700	tpm	0	2.61314	4.39442	0	-	-	-	-	-	-
QTL_4B.1	TraesCS4B03G0013200	5674268	5676260	Haloacid dehalogenase-like hydrolase superfamily protein	TraesCS4B01G009800	tpm	0	1.74085	0.911623	0	-	-	-	-	-	-
QTL_4B.1	TraesCS4B03G0013100	5665779	5670020	Beta-amylase	TraesCS4B01G009900	tpm	0.809242	2.19068	2.34714	0.419862	2.03286	1.18497	1.22441	1.11763	0.50585	DR
QTL_4B.2	TraesCS4B03G0019900	7276002	7276726	GDSL esterase/lipase	TraesCS4B01G006600	tpm	0	0	0	0	-	-	-	-	-	-
QTL_4B.2	TraesCS4B03G0019600	7266869	7273008	Protein HIRA	TraesCS4B01G006700	tpm	2.97203	2.94485	3.15333	1.61031	2.44834	2.22654	2.29542	2.24551	1.96686	NC
QTL_4B.2	TraesCS4B03G0019500	7253579	7257515	Fatty acyl-CoA reductase	TraesCS4B01G006800	tpm	0	2.94659	2.07104	0	-	-	-	-	-	-
QTL_4B.2	TraesCS4B03G0018400	7084337	7087845	GDSL esterase/lipase	TraesCS4B01G006900	tpm	0	0	0	0	-	-	-	-	-	-
QTL_4B.2	TraesCS4B03G0018300	7074978	7077800	Leucine-rich repeat receptor-like protein kinase family protein	TraesCS4B01G007000	tpm	0.00689401	0	0	0	-	-	-	-	-	-
QTL_4B.2	TraesCS4B03G0018100	6943116	6947537	R3h domain containing protein, putative	TraesCS4B01G007100	tpm	5.01755	3.89488	4.24786	3.42555	3.769	3.30689	3.4244	3.20972	2.95361	NC
QTL_4B.2	TraesCS4B03G0018000	6902643	6905948	Calcium-transporting ATPase	TraesCS4B01G007200	tpm	0	0	0	0	-	-	-	-	-	-
QTL_4B.2	TraesCS4B03G0017900	6898433	6901748	Ribosomal protein	TraesCS4B01G007300	tpm	6.00323	6.25501	6.24307	6.382	6.13962	5.42438	6.95334	7.09513	7.32124	UR
QTL_4B.2	TraesCS4B03G0017800	6841063	6845077	Receptor protein kinase, putative	TraesCS4B01G007400	tpm	0	0	0	0	-	-	-	-	-	-
QTL_4B.2	TraesCS4B03G0017700	6802311	6806219	Disease resistance protein	TraesCS4B01G007500	tpm	0	0.427697	2.01085	0	-	-	-	-	-	-
QTL_4B.2	TraesCS4B03G0017400	6779772	6782952	Leucine-rich repeat receptor-like protein kinase family protein	TraesCS4B01G007600	tpm	0	0	0	0	-	-	-	-	-	-
QTL_4B.2	TraesCS4B03G0016800	6622209	6624334	Leucine-rich repeat receptor-like protein kinase family protein	TraesCS4B01G007700	tpm	0	0	0	0	-	-	-	-	-	-
QTL_4B.2	TraesCS4B03G0016700	6603474	6606350	Leucine-rich repeat receptor-like protein kinase family protein	TraesCS4B01G007800	tpm	0	0	0	0	-	-	-	-	-	-
QTL_4B.2	TraesCS4B03G0016500	6542399	6542847	Leucine-rich repeat receptor-like protein kinase family protein	TraesCS4B01G007900	tpm	0	0	0	0	-	-	-	-	-	-
QTL_4B.3	NA	NA	NA	NA	NA	NA	NA	NA	NA	NA	-	-	-	-	-	-
QTL_4B.3	NA	NA	NA	NA	NA	NA	NA	NA	NA	NA	-	-	-	-	-	-
QTL_4B.3	NA	NA	NA	NA	NA	NA	NA	NA	NA	NA	-	-	-	-	-	-
QTL_4B.3	NA	NA	NA	NA	NA	NA	NA	NA	NA	NA	-	-	-	-	-	-
QTL_4B.3	NA	NA	NA	NA	NA	NA	NA	NA	NA	NA	-	-	-	-	-	-
QTL_4B.3	NA	NA	NA	NA	NA	NA	NA	NA	NA	NA	-	-	-	-	-	-
QTL_4B.4	TraesCS4B03G0826600	608191519	608195752	disease resistance protein (TIR-NBS-LRR class)	TraesCS4B01G318600	tpm	2.16286	0	0	0	-	-	-	-	-	-
QTL_4B.4	TraesCS4B03G0827300	608283983	608290090	DUF21 domain-containing protein	TraesCS4B01G318700	tpm	1.68788	5.47153	4.06323	2.69955	3.27186	2.93363	2.65597	1.41651	2.18776	DR
QTL_4B.4	TraesCS4B03G0827400	608303575	608306664	P-loop containing nucleoside triphosphate hydrolases superfamily protein	TraesCS4B01G318800	tpm	0	0	0	0	-	-	-	-	-	-
QTL_4B.4	TraesCS4B03G0827500	608351609	608356547	Anthranilate phosphoribosyltransferase	TraesCS4B01G318900	tpm	2.99081	3.46697	1.62124	3.3377	3.52857	3.6048	3.78583	3.78099	3.87892	NC
QTL_4B.4	TraesCS4B03G0827600	608364462	608368062	C-terminal binding protein	TraesCS4B01G319000	tpm	2.54851	2.91059	3.53676	2.06274	2.56034	2.23513	2.1686	2.15899	1.9391	NC
QTL_4B.4	TraesCS4B03G0827700	608372756	608376235	Chaperone protein dnaJ	TraesCS4B01G319100	tpm	2.6472	2.2378	1.88454	0.10431	1.66941	0.973648	1.05268	0.920333	0.550923	DR
QTL_4B.4	TraesCS4B03G0828000	608382702	608387973	S-adenosyl-L-methionine-dependent methyltransferase domain-containing protein	TraesCS4B01G319200	tpm	0	0	0	0	-	-	-	-	-	-
QTL_4B.4	TraesCS4B03G0828100	608390162	608394084	S-adenosyl-L-methionine-dependent methyltransferase domain-containing protein	TraesCS4B01G319300	tpm	0.0404997	4.39007	2.24193	0	-	-	-	-	-	-
QTL_4B.4	TraesCS4B03G0828200	608452172	608452558	Zinc finger-like protein	TraesCS4B01G319400	tpm	0	0	0	0	-	-	-	-	-	-
QTL_4B.5	TraesCS4B03G0954500	656630679	656633075	Sodium transporter family protein	TraesCS4B01G370800	tpm	0	0.212568	0	0	-	-	-	-	-	-
QTL_4B.5	TraesCS4B03G0954700	656636905	656644085	Nitrate transporter 1.1	TraesCS4B01G371000	tpm	0	0	0	0	-	-	-	-	-	-
QTL_4B.5	TraesCS4B03G0955000	656694368	656699110	Disease resistance protein (NBS-LRR class) family	TraesCS4B01G371100	tpm	0	0.943159	0.979096	0	-	-	-	-	-	-
QTL_4B.5	TraesCS4B03G0955200	656707126	656708956	Glycosyltransferase	TraesCS4B01G371200	tpm	0	0.417656	0	0	-	-	-	-	-	-
QTL_4B.5	TraesCS4B03G0955300	656715207	656718688	Palmitoyl protein thioesterase containing protein, expressed	TraesCS4B01G371300	tpm	2.21176	3.50848	3.95621	3.37043	3.74646	3.21205	3.91784	2.43122	2.91603	NC
QTL_4B.5	TraesCS4B03G0955400	656719135	656726662	Protein ARABIDILLO 1	TraesCS4B01G371400	tpm	2.83787	3.04201	3.13534	1.41086	3.0638	2.40552	2.3187	1.97962	1.78802	DR
QTL_4B.5	TraesCS4B03G0955700	656974962	656976073	BTB/POZ and MATH domain-containing protein 1	TraesCS4B01G371500	tpm	0	0	0	0	-	-	-	-	-	-
QTL_4B.5	TraesCS4B03G0955800	656981122	656986413	Protein kinase	TraesCS4B01G371600	tpm	0	0	0	0	-	-	-	-	-	-
QTL_4B.5	TraesCS4B03G0955900	656987455	656992329	Sugar transporter, putative	TraesCS4B01G371700	tpm	0	1.24589	3.39187	0	-	-	-	-	-	-
QTL_4B.5	TraesCS4B03G0956000	656997984	657000148	Phosphoglycerate mutase family protein	TraesCS4B01G371800	tpm	2.24647	1.73281	0.836781	0	-	-	-	-	-	-
QTL_4B.5	TraesCS4B03G0956100	657000522	657003732	Alcohol dehydrogenase	TraesCS4B01G371900	tpm	3.51488	3.94998	4.16591	3.72552	3.89561	3.46578	3.79175	3.7693	4.23622	NC
QTL_4B.5	TraesCS4B03G0956300	657048156	657048704	DNA topoisomerase	TraesCS4B01G372000	tpm	0	0	0	0	-	-	-	-	-	-
QTL_4B.5	TraesCS4B03G0956400	657058744	657061648	Leucine-rich repeat receptor protein kinase family protein	TraesCS4B01G372100	tpm	0	0	0	0	-	-	-	-	-	-
QTL_4B.5	TraesCS4B03G0956600	657086545	657088947	Leucine-rich repeat receptor-like protein kinase family	TraesCS4B01G372200	tpm	0	0	0	0	-	-	-	-	-	-
QTL_4B.5	TraesCS4B03G0957000	657104233	657106462	Nucellin-like aspartic protease	TraesCS4B01G372300	tpm	0	0.733155	0.916981	0	-	-	-	-	-	-
QTL_4B.5	TraesCS4B03G0957100	657110865	657125439	Receptor-like protein kinase	TraesCS4B01G372400	tpm	3.58168	0	0	0	-	-	-	-	-	-
QTL_4B.5	TraesCS4B03G0957900	657362332	657363515	F-box domain containing protein	TraesCS4B01G372500	tpm	0	0	0	0	-	-	-	-	-	-
QTL_4B.5	TraesCS4B03G0958100	657369859	657377638	Helicase, putative	TraesCS4B01G372600	tpm	2.02907	1.34207	0.494661	0	-	-	-	-	-	-
QTL_4B.5	TraesCS4B03G0958300	657418538	657420627	Zinc finger constans-like protein	TraesCS4B01G372700	tpm	0	0	0	0	-	-	-	-	-	-
QTL_4B.5	TraesCS4B03G0958700	657507463	657508866	F-box family protein	TraesCS4B01G372800	tpm	0	0	0	0	-	-	-	-	-	-
QTL_4B.5	TraesCS4B03G0959000	657544155	657548358	Disease resistance protein	TraesCS4B01G372900	tpm	4.45698	3.11136	2.74566	0	-	-	-	-	-	-
QTL_4D.1	TraesCS4D03G0004500	1362318	1367013	RING/U-box superfamily protein	TraesCS4D01G003000	tpm	2.15906	2.43829	3.0125	1.67091	1.85792	1.48551	1.78968	1.19505	1.48926	NC
QTL_4D.1	TraesCS4D03G0004600	1368870	1373554	Phosphate transporter	TraesCS4D01G003100	tpm	0.287768	4.26862	3.39316	1.11737	2.11912	1.29039	1.22772	0	0	DR
QTL_4D.1	TraesCS4D03G0004700	1374679	1379306	Short-chain dehydrogenase/reductase family protein	TraesCS4D01G003200	tpm	1.89015	2.33863	1.22576	2.84756	3.35078	2.84286	1.75636	0.713331	0	DR
QTL_4D.1	TraesCS4D03G0004800	1390139	1393851	Receptor-kinase, putative	TraesCS4D01G003300	tpm	0	0	0	0	-	-	-	-	-	-
QTL_4D.1	TraesCS4D03G0004900	1397353	1399554	Short-chain dehydrogenase/reductase family protein	TraesCS4D01G003400	tpm	1.3094	0.758891	0	0	-	-	-	-	-	-
QTL_4D.1	TraesCS4D03G0005000	1400675	1404459	Zinc finger, C2H2	TraesCS4D01G003500	tpm	1.66561	1.67687	2.75884	1.75461	2.17039	1.72277	1.84734	2.01683	1.21401	NC
QTL_4D.1	TraesCS4D03G0005100	1406011	1408464	PsbP-like protein 1	TraesCS4D01G003600	tpm	0	4.99466	3.41622	1.16629	2.55171	0.949285	0.14393	0	0	DR
QTL_4D.1	TraesCS4D03G0005800	1630996	1636148	Kinase family protein	TraesCS4D01G003800	tpm	0	0	0	0	-	-	-	-	-	-
QTL_4D.1	TraesCS4D03G0006100	1655892	1658459	Receptor-like protein kinase	TraesCS4D01G003900	tpm	0	0	0	0	-	-	-	-	-	-
QTL_4D.1	TraesCS4D03G0006500	1693854	1698641	Disease resistance protein (NBS-LRR class) family	TraesCS4D01G004000	tpm	0	1.66649	3.45055	0	-	-	-	-	-	-
QTL_4D.1	TraesCS4D03G0006600	1808058	1813801	NBS-LRR-like resistance protein	TraesCS4D01G004100	tpm	1.07972	0.305967	0.167641	0	-	-	-	-	-	-
QTL_4D.1	TraesCS4D03G0006900	1857162	1864002	NBS-LRR-like resistance protein	TraesCS4D01G004200	tpm	2.33659	0	0	0	-	-	-	-	-	-
QTL_4D.1	TraesCS4D03G0007600	2233090	2237239	Receptor-like kinase	TraesCS4D01G004300	tpm	0	0	0	0	-	-	-	-	-	-
QTL_4D.1	TraesCS4D03G0007500	2210061	2211185	Cysteine protease, putative	TraesCS4D01G004400	tpm	0	0	0	0	-	-	-	-	-	-
QTL_4D.1	TraesCS4D03G0007400	2159778	2160428	2-oxoglutarate (2OG) and Fe(II)-dependent oxygenase superfamily protein	TraesCS4D01G004500	tpm	0	0	0	0	-	-	-	-	-	-
QTL_4D.1	TraesCS4D03G0007300	2157319	2157750	protein kinase family protein	TraesCS4D01G004600	tpm	1.70028	0	0	0	-	-	-	-	-	-
QTL_4D.1	TraesCS4D03G0007200	2118829	2121262	transmembrane protein, putative (DUF594)	TraesCS4D01G004700	tpm	0	0	0	0	-	-	-	-	-	-
QTL_4D.1	TraesCS4D03G0008000	2317575	2321028	Receptor-like protein kinase	TraesCS4D01G005000	tpm	0	0	0	0	-	-	-	-	-	-
QTL_4D.1	TraesCS4D03G0007700	2275324	2285972	Receptor-like protein kinase	TraesCS4D01G005100	tpm	0	0	0	0	-	-	-	-	-	-
QTL_4D.2	N/A	N/A	N/A	N/A	N/A	N/A	N/A	N/A	N/A	N/A	-	-	-	-	-	-
QTL_4D.2	N/A	N/A	N/A	N/A	N/A	N/A	N/A	N/A	N/A	N/A	-	-	-	-	-	-
QTL_5A.1	TraesCS5A03G0741000	513792478	513799659	NBS-LRR disease resistance protein	TraesCS5A01G304400	tpm	4.00465	0	0.715322	0	-	-	-	-	-	-
QTL_5A.1	TraesCS5A03G0741100	513820628	513821627	isopentenyltransferase 9	TraesCS5A01G304500	tpm	3.97824	3.64894	5.5068	1.67489	1.81513	1.71107	1.89453	1.84037	0.255671	DR
QTL_5A.1	TraesCS5A03G0741700	514267605	514273992	CsAtPR5	TraesCS5A01G304600	tpm	0	0	0	0	-	-	-	-	-	-
QTL_5A.1	TraesCS5A03G0741900	514404802	514408289	Formin-like protein	TraesCS5A01G304700	tpm	0.179231	0	0	0	-	-	-	-	-	-
QTL_5A.1	TraesCS5A03G0742000	514408314	514412309	Acyl-coenzyme A thioesterase 9, mitochondrial	TraesCS5A01G304800	tpm	1.85338	1.98531	3.0287	1.97112	1.7889	0.975811	0.880839	0	0.511505	DR
QTL_5A.1	TraesCS5A03G0742200	514432747	514434541	Glycosyltransferase	TraesCS5A01G304900	tpm	0	0	0	0	-	-	-	-	-	-
QTL_5A.1	TraesCS5A03G0742500	514522481	514524679	Glycosyltransferase	TraesCS5A01G305000	tpm	0	0	0	0	-	-	-	-	-	-
QTL_5A.1	TraesCS5A03G0742600	514565552	514567486	Glycosyltransferase	TraesCS5A01G305100	tpm	0	0	0	0	-	-	-	-	-	-
QTL_5A.1	TraesCS5A03G0748400	520442197	520443021	Basic helix loop helix (BHLH) family transcription factor	TraesCS5A01G306700	tpm	0	0	0	0	-	-	-	-	-	-
QTL_5A.1	TraesCS5A03G0748500	520600319	520602299	DNA polymerase delta subunit 4	TraesCS5A01G306800	tpm	3.42907	3.23878	2.14556	3.3047	2.82249	2.13782	3.49838	3.90498	4.6581	UR
QTL_5A.1	TraesCS5A03G0748600	520626590	520633322	Pimeloyl-[acyl-carrier protein] methyl ester esterase	TraesCS5A01G306900	tpm	7.22009	4.48148	3.89166	2.979	3.07832	2.80725	3.28373	2.68597	2.90527	NC
QTL_5A.1	TraesCS5A03G0748700	520635044	520637742	Pentatricopeptide repeat-containing protein, putative	TraesCS5A01G307000	tpm	0	0	0	0	-	-	-	-	-	-
QTL_5A.1	TraesCS5A03G0748800	520641171	520647379	Cell division cycle 5-like protein	TraesCS5A01G307100	tpm	4.07232	4.23695	3.81773	2.42089	3.20876	3.21618	3.52634	3.60826	3.59674	NC
QTL_5A.1	TraesCS5A03G0748900	520651402	520653758	Serine carboxypeptidase, putative	TraesCS5A01G307200	tpm	0	3.87309	2.80143	2.9787	4.1991	4.02803	4.32507	2.69745	3.90765	NC
QTL_5A.1	TraesCS5A03G0749000	520692642	520703254	PHD-finger family protein, expressed	TraesCS5A01G307300	tpm	2.84419	2.51098	2.93736	1.08032	1.82925	1.79843	2.41407	2.3783	2.6681	NC
QTL_5A.1	TraesCS5A03G0749700	520839377	520843385	Serine carboxypeptidase family protein	TraesCS5A01G307400	tpm	0	0	0	0	-	-	-	-	-	-
QTL_5A.1	TraesCS5A03G0749800	520863668	520865431	CoA ligase	TraesCS5A01G307500	tpm	0	0	0	0	-	-	-	-	-	-
QTL_5A.1	TraesCS5A03G0750100	520954997	520956647	Cytochrome P450 family protein	TraesCS5A01G307600	tpm	0	0	0	0	-	-	-	-	-	-
QTL_5A.1	TraesCS5A03G0750200	520980441	520995414	Cytochrome P450 family protein, expressed	TraesCS5A01G307700	tpm	0.610606	1.64095	0	0	-	-	-	-	-	-
QTL_5A.1	TraesCS5A03G0750300	521120573	521125240	F-box family protein	TraesCS5A01G307800	tpm	0	0	0	0	-	-	-	-	-	-
QTL_5A.1	TraesCS5A03G0741400	514197698	514201034	#N/A	#N/A	#N/A	#N/A	#N/A	#N/A	#N/A	-	-	-	-	-	-
QTL_5A.2	TraesCS5A03G0798700	540128134	540128553	Defensin	TraesCS5A01G330100	tpm	0	0	0	0	-	-	-	-	-	-
QTL_5A.2	TraesCS5A03G0798800	540133045	540138036	Homeobox leucine zipper protein	TraesCS5A01G330200	tpm	0	0	0	0	-	-	-	-	-	-
QTL_5A.2	TraesCS5A03G0798900	540451465	540451852	Nuclease S1	TraesCS5A01G330300	tpm	0	0	0	0	-	-	-	-	-	-
QTL_5A.2	TraesCS5A03G0799500	540581561	540588030	Synaptotagmin-2	TraesCS5A01G330400	tpm	6.02046	5.75667	6.1798	4.41471	5.47115	5.06435	5.12512	5.15687	4.35993	DR
QTL_5A.2	TraesCS5A03G0799600	540675667	540679801	Receptor-like kinase	TraesCS5A01G330500	tpm	5.11062	2.16817	0.871434	0	-	-	-	-	-	-
QTL_5A.2	TraesCS5A03G0799700	540681861	540682881	Translation initiation factor IF-2	TraesCS5A01G330600	tpm	4.72034	2.19224	1.91497	0	-	-	-	-	-	-
QTL_5A.2	TraesCS5A03G0799900	540685074	540688772	3-dehydroquinate synthase	TraesCS5A01G330700	tpm	5.5676	5.35933	5.70099	4.58883	4.31072	3.29091	3.96006	2.42074	2.74541	DR
QTL_5A.2	TraesCS5A03G0800100	540898060	540902661	Chitobiosyldiphosphodolichol beta-mannosyltransferase	TraesCS5A01G330800	tpm	0	0	0	0	-	-	-	-	-	-
QTL_5A.2	TraesCS5A03G0800200	540904254	540909743	Beta-galactosidase	TraesCS5A01G330900	tpm	0	0	0	0	-	-	-	-	-	-
QTL_5A.2	TraesCS5A03G0800300	540913067	540916281	Protein MCM10-like protein	TraesCS5A01G331000	tpm	0.508337	0	0	0	-	-	-	-	-	-
QTL_5A.2	TraesCS5A03G0800400	540917512	540917901	serine carboxypeptidase-like 7	TraesCS5A01G331100	tpm	0	0	0.900042	0	-	-	-	-	-	-
QTL_5A.2	TraesCS5A03G0800500	540943398	540944488	NAD(P)-linked oxidoreductase superfamily protein	TraesCS5A01G331200	tpm	0	0	0	0	-	-	-	-	-	-
QTL_5A.2	TraesCS5A03G0800700	540987343	540990307	SKP1-like protein	TraesCS5A01G331300	tpm	0.62038	1.78225	4.44493	4.64744	4.57688	3.14068	2.87219	2.9277	2.98469	DR
QTL_5A.2	TraesCS5A03G0800800	540990710	540991620	RING/FYVE/PHD zinc finger superfamily protein	TraesCS5A01G331400	tpm	0	0	0	0	-	-	-	-	-	-
QTL_5A.2	TraesCS5A03G0800900	540992521	540995615	Acyl carrier protein	TraesCS5A01G331500	tpm	5.41335	5.21099	4.30695	5.02837	5.1999	4.11689	3.59994	3.59495	2.77761	DR
QTL_5A.2	TraesCS5A03G0801100	541004842	541005237	Disease resistance protein RPM1	TraesCS5A01G331600	tpm	0	0	0	0	-	-	-	-	-	-
QTL_5A.2	TraesCS5A03G0801200	541008740	541009915	transmembrane protein, putative (DUF247)	TraesCS5A01G331700	tpm	0	0	0	0	-	-	-	-	-	-
QTL_5A.2	TraesCS5A03G0801400	541014889	541018363	Mediator of RNA polymerase II transcription subunit 4	TraesCS5A01G331800	tpm	1.18896	1.40122	1.45391	0.866821	1.61331	1.13018	1.85116	1.96214	1.37216	NC
QTL_5A.2	TraesCS5A03G0801600	541018537	541024997	WD-repeat protein, putative	TraesCS5A01G331900	tpm	2.49986	1.5796	0.319213	0	-	-	-	-	-	-
QTL_5A.3	TraesCS5A03G0929400	586722077	586726864	Nitrate transporter 1.2	TraesCS5A01G388000	tpm	0	1.00464	0	0	-	-	-	-	-	-
QTL_5A.3	TraesCS5A03G0929900	586764966	586766366	Ammonium transporter	TraesCS5A01G388100	tpm	0	0	0	0	-	-	-	-	-	-
QTL_5A.3	TraesCS5A03G0930000	586823429	586825870	Beta-glucosidase	TraesCS5A01G388200	tpm	0	0	0	0	-	-	-	-	-	-
QTL_5A.3	TraesCS5A03G0930300	586873981	586878632	Beta-glucosidase	TraesCS5A01G388300	tpm	5.90507	6.29503	6.81918	7.06687	6.6706	4.74881	2.14096	2.53123	2.20012	DR
QTL_5A.3	TraesCS5A03G0930400	586924108	586928249	Beta-glucosidase	TraesCS5A01G388400	tpm	4.97684	3.033	0	0	-	-	-	-	-	-
QTL_5A.3	TraesCS5A03G0930500	586932179	586935818	Beta-glucosidase	TraesCS5A01G388500	tpm	0	2.90986	0	0	-	-	-	-	-	-
QTL_5A.3	TraesCS5A03G0930700	586942752	586943507	F-box family protein	TraesCS5A01G388600	tpm	0	0	0	0	-	-	-	-	-	-
QTL_5A.3	TraesCS5A03G0930900	586949889	586955014	Pentatricopeptide repeat-containing protein	TraesCS5A01G388700	tpm	0.114434	0	0	0	-	-	-	-	-	-
QTL_5A.3	TraesCS5A03G0931000	587052554	587056321	Receptor-like protein kinase	TraesCS5A01G388800	tpm	0	0	0	0	-	-	-	-	-	-
QTL_5A.3	TraesCS5A03G0931100	587066444	587070787	Beta-glucosidase	TraesCS5A01G388900	tpm	1.97489	2.38592	2.48662	0	-	-	-	-	-	-
QTL_5A.3	TraesCS5A03G0931200	587085923	587090958	Beta-glucosidase	TraesCS5A01G389000	tpm	3.49386	2.53547	1.82985	2.54044	2.07553	1.00747	0.394113	0	1.21308	NC
QTL_5A.3	TraesCS5A03G0931300	587248798	587251704	Beta-glucosidase	TraesCS5A01G389100	tpm	3.56307	4.68431	1.832	0	-	-	-	-	-	-
QTL_5A.3	TraesCS5A03G0931400	587255375	587266191	Protein kinase	TraesCS5A01G389200	tpm	3.98771	3.38171	3.49504	2.50495	3.01343	2.75652	3.73248	3.98981	4.07651	UR
QTL_5A.3	TraesCS5A03G0931500	587266357	587268335	Protein-lysine N-methyltransferase	TraesCS5A01G389300	tpm	0.273504	0	0	0	-	-	-	-	-	-
QTL_5A.3	TraesCS5A03G0931600	587268261	587269354	Universal stress protein family protein	TraesCS5A01G389400	tpm	0	0.938414	0	2.11469	3.21674	3.68697	5.32417	6.53848	6.08702	UR
QTL_5A.3	TraesCS5A03G0931800	587272914	587278565	Universal stress protein family protein	TraesCS5A01G389500	tpm	0	0	0	0	-	-	-	-	-	-
QTL_5A.3	TraesCS5A03G0932300	587280711	587282503	Universal stress protein family protein	TraesCS5A01G389700	tpm	0	0	0	0	-	-	-	-	-	-
QTL_5A.3	TraesCS5A03G0932400	587282834	587286464	Tetratricopeptide repeat protein	TraesCS5A01G389800	tpm	2.14936	3.05932	2.40984	3.3354	3.12766	3.22575	4.02658	4.502	3.97533	NC
QTL_5A.3	TraesCS5A03G0932500	587291538	587292621	U3 small nucleolar RNA-associated protein 18-like protein	TraesCS5A01G389900	tpm	0	0	0	0	-	-	-	-	-	-
QTL_5A.3	TraesCS5A03G0932600	587306628	587314215	Kinesin-like protein	TraesCS5A01G390000	tpm	3.30471	1.95824	1.69467	0	-	-	-	-	-	-
QTL_5A.3	TraesCS5A03G0932900	587339547	587340014	Heavy metal transport/detoxification superfamily protein	TraesCS5A01G390100	tpm	0	0	0	0	-	-	-	-	-	-
QTL_5A.3	TraesCS5A03G0933000	587341207	587343837	Strictosidine synthase	TraesCS5A01G390200	tpm	5.12172	3.44791	4.03973	3.78436	3.85652	3.18328	4.10659	4.31203	3.52758	NC
QTL_5A.3	TraesCS5A03G0933200	587460954	587466122	Transcriptional adapter ADA2	TraesCS5A01G390300	tpm	5.16296	4.60586	5.01119	3.13358	3.91409	3.37782	3.64019	3.50062	4.23904	NC
QTL_5A.3	TraesCS5A03G0933300	587485058	587488395	Structural maintenance of chromosomes protein 2	TraesCS5A01G390400	tpm	0.0797706	0	0	0	-	-	-	-	-	-
QTL_5A.3	TraesCS5A03G0933400	587590324	587591571	HMG-Y-related protein A	TraesCS5A01G390500	tpm	2.05957	1.68167	0.982919	0.295276	3.75994	3.22855	2.12259	2.28571	1.31441	DR
QTL_5A.4	TraesCS5A03G0959000	597835774	597837567	CASP-like protein	TraesCS5A01G403800	tpm	0.0214229	1.09202	0.108732	0	-	-	-	-	-	-
QTL_5A.4	TraesCS5A03G0959100	597848605	597849681	HTH-type transcriptional regulator	TraesCS5A01G403900	tpm	1.69366	0	0	0	-	-	-	-	-	-
QTL_5A.4	TraesCS5A03G0959300	597860541	597861445	DUF4228 domain protein	TraesCS5A01G404000	tpm	0.141001	0	0.621112	0	-	-	-	-	-	-
QTL_5A.4	TraesCS5A03G0959600	597870943	597871854	HTH-type transcriptional regulator	TraesCS5A01G404100	tpm	0	0	0	0	-	-	-	-	-	-
QTL_5A.4	TraesCS5A03G0959700	597903015	597904220	HTH-type transcriptional regulator	TraesCS5A01G404200	tpm	0	0	0	0	-	-	-	-	-	-
QTL_5A.4	TraesCS5A03G0960200	598181386	598185822	electron transporter, putative (Protein of unknown function, DUF547)	TraesCS5A01G404300	tpm	0.748796	0	1.11791	0	-	-	-	-	-	-
QTL_5A.4	TraesCS5A03G0960300	598262020	598265811	transmembrane protein (DUF616)	TraesCS5A01G404400	tpm	0.756622	1.85005	2.35445	2.09206	2.32169	1.56892	1.25838	1.3413	1.32609	DR
QTL_5A.4	TraesCS5A03G0960400	598266754	598268752	30S ribosomal protein S9	TraesCS5A01G404500	tpm	0	3.9227	1.37202	0	-	-	-	-	-	-
QTL_5A.4	TraesCS5A03G0960500	598276028	598280377	BTB/POZ domain-containing protein	TraesCS5A01G404600	tpm	1.47085	1.98214	2.11977	0	-	-	-	-	-	-
QTL_5A.4	TraesCS5A03G0960600	598301453	598302013	Calcium-binding protein	TraesCS5A01G404700	tpm	0	0	0	0	-	-	-	-	-	-
QTL_5A.4	TraesCS5A03G0960700	598335708	598338447	Cytochrome c biogenesis protein	TraesCS5A01G404800	tpm	0	0	0	0	-	-	-	-	-	-
QTL_5A.4	TraesCS5A03G0960800	598367620	598368359	3-hydroxy-3-methylglutaryl coenzyme A reductase	TraesCS5A01G404900	tpm	0.383873	0	0	0.465536	1.49705	2.01322	1.14534	1.4458	0	DR
QTL_5A.4	TraesCS5A03G0961000	598374787	598376401	Protein PHLOEM PROTEIN 2-LIKE A10	TraesCS5A01G405000	tpm	2.13947	1.80499	1.40628	0.783539	1.18876	0.755767	1.00089	0.779705	0.0186633	DR
QTL_5A.4	TraesCS5A03G0961100	598379982	598382047	E3 ubiquitin-protein ligase MARCH6	TraesCS5A01G405100	tpm	0	0.587942	0	0	-	-	-	-	-	-
QTL_5A.4	TraesCS5A03G0961400	598394917	598395870	Basic-leucine zipper (BZIP) transcription factor family	TraesCS5A01G405200	tpm	0	0	0	0	-	-	-	-	-	-
QTL_5A.4	TraesCS5A03G0961600	598474545	598478749	RNA-binding protein-like	TraesCS5A01G405300	tpm	2.73729	2.35743	1.37617	2.9389	2.63658	1.91028	1.50594	2.21625	1.4786	DR
QTL_5A.5	TraesCS5A03G1078900	638832040	638835997	carboxyl-terminal peptidase, putative (DUF239)	TraesCS5A01G457200	tpm	2.52257	1.95995	2.8227	0.904826	1.85132	1.59969	0	0.486637	0	DR
QTL_5A.5	TraesCS5A03G1079200	638870368	638871752	2-oxoglutarate (2OG) and Fe(II)-dependent oxygenase superfamily protein	TraesCS5A01G457300	tpm	0	0	0	0	-	-	-	-	-	-
QTL_5A.5	TraesCS5A03G1079400	638904200	638906199	DUF1639 family protein	TraesCS5A01G457400	tpm	1.89232	1.29345	2.37451	0.748793	1.56314	1.25159	0.799955	0.728937	0.165613	DR
QTL_5A.5	TraesCS5A03G1079500	638943691	638944652	Photosystem I reaction center subunit II	TraesCS5A01G457500	tpm	2.45915	9.06983	7.189	2.92485	5.6578	4.1702	2.14016	0	1.45431	DR
QTL_5A.5	TraesCS5A03G1080200	639390212	639394364	Blue copper protein	TraesCS5A01G457700	tpm	3.78063	1.72851	1.59344	0	-	-	-	-	-	-
QTL_5B.1	TraesCS5B03G0662600	440925163	440928768	TPR repeat-containing protein ZIP4	TraesCS5B01G255100	tpm	1.76606	1.33245	1.86853	1.04242	1.70714	1.09446	1.50292	1.43369	1.22572	NC
QTL_5B.1	TraesCS5B03G0662800	441030067	441036161	Subtilisin-like protease	TraesCS5B01G255200	tpm	0	0	0	0.224913	2.85445	1.72454	0	0	0	DR
QTL_5B.1	TraesCS5B03G0662900	441039240	441041135	Ras-related protein	TraesCS5B01G255300	tpm	0	0	1.69659	0	-	-	-	-	-	-
QTL_5B.1	TraesCS5B03G0664000	441161722	441161919	Type 2 phosphatidylinositol 4,5-bisphosphate 4-phosphatase	TraesCS5B01G255400	tpm	2.91465	1.3124	3.46338	3.2858	4.23898	4.09867	4.10349	2.85483	1.2266	DR
QTL_5B.1	TraesCS5B03G0664400	441290926	441293915	Pentatricopeptide repeat-containing protein	TraesCS5B01G255500	tpm	0	0	0	0	-	-	-	-	-	-
QTL_5B.1	TraesCS5B03G0664500	441335965	441336414	CD5 antigen-like	TraesCS5B01G255600	tpm	0	0	0	0	-	-	-	-	-	-
QTL_5B.1	TraesCS5B03G0664600	441340949	441345178	Hexosyltransferase	TraesCS5B01G255700	tpm	1.1635	0.812339	1.20409	0.606037	1.67699	0.707201	1.29908	1.62207	0.530124	DR
QTL_5B.1	TraesCS5B03G0664900	441616516	441617163	Transducin/WD40 repeat-like superfamily protein	TraesCS5B01G255800	tpm	4.00134	2.92438	4.07783	4.10619	4.45033	4.5924	4.98081	3.42427	2.64524	DR
QTL_5B.1	TraesCS5B03G0665000	441670258	441671253	Nuclear factor Y subunit C	TraesCS5B01G255900	tpm	2.36207	1.38021	2.90457	0.935395	1.50631	1.12496	1.49884	0.31121	0	DR
QTL_5B.2	TraesCS5B03G0702900	458305542	458309110	Cinnamoyl-CoA reductase 4	TraesCS5B01G269500	tpm	3.2875	0.345548	0	3.93417	2.58074	3.23391	4.56902	4.96873	4.96634	UR
QTL_5B.2	TraesCS5B03G0703200	458559096	458563293	3-hydroxy-3-methylglutaryl coenzyme A reductase	TraesCS5B01G269600	tpm	3.68276	1.93751	2.59867	1.81394	2.47332	1.88635	3.23992	2.79495	2.18561	NC
QTL_5B.2	TraesCS5B03G0703600	458680831	458681085	3-phosphoshikimate 1-carboxyvinyltransferase	TraesCS5B01G269700	tpm	0	0	0	0	-	-	-	-	-	-
QTL_5B.2	TraesCS5B03G0703900	458682727	458683941	Maturase	TraesCS5B01G269800	tpm	0	0	0	0	-	-	-	-	-	-
QTL_5B.2	TraesCS5B03G0704000	458685284	458685652	Orf101b	TraesCS5B01G269900	tpm	0	0	0	0	-	-	-	-	-	-
QTL_5B.2	TraesCS5B03G0704300	458786500	458793021	Proton pump-interactor 1	TraesCS5B01G270000	tpm	3.60304	2.15655	4.3341	4.20442	4.87172	4.40682	4.00639	3.31259	2.73706	DR
QTL_5B.2	TraesCS5B03G0704400	458793707	458794611	Cysteine/histidine-rich C1 domain protein	TraesCS5B01G270100	tpm	0	0	0	0	-	-	-	-	-	-
QTL_5B.2	TraesCS5B03G0704500	458800301	458803113	NAD(P)-binding Rossmann-fold superfamily protein	TraesCS5B01G270200	tpm	0	5.3604	3.62916	0	-	-	-	-	-	-
QTL_5B.2	TraesCS5B03G0704800	458814269	458815272	HTH-type transcriptional regulator	TraesCS5B01G270300	tpm	1.54695	0	0.163429	0	-	-	-	-	-	-
QTL_5B.2	TraesCS5B03G0704900	458817025	458817510	Ubiquitin carboxyl-terminal hydrolase isozyme L5	TraesCS5B01G270400	tpm	0	0	0	0	-	-	-	-	-	-
QTL_5B.2	TraesCS5B03G0705400	458878052	458878950	HTH-type transcriptional regulator	TraesCS5B01G270500	tpm	0.306957	0	0.584443	0	-	-	-	-	-	-
QTL_5B.2	TraesCS5B03G0705500	458882264	458883172	TMV response-related protein	TraesCS5B01G270600	tpm	0	0	0	0	-	-	-	-	-	-
QTL_5B.2	TraesCS5B03G0705600	458890500	458892253	Cytochrome P450	TraesCS5B01G270700	tpm	0	0	0	0	-	-	-	-	-	-
QTL_5B.2	TraesCS5B03G0705700	458935677	458937398	Serine/threonine-protein kinase	TraesCS5B01G270800	tpm	0	0	0	0	-	-	-	-	-	-
QTL_5B.2	TraesCS5B03G0705800	459027005	459028672	Cytochrome P450	TraesCS5B01G270900	tpm	0	0	0	0	-	-	-	-	-	-
QTL_5B.2	TraesCS5B03G0705900	459031236	459035650	Serine/threonine-protein kinase	TraesCS5B01G271000	tpm	0	0	0	0	-	-	-	-	-	-
QTL_5B.3	TraesCS5B03G0901900	541838677	541848260	Phosphatidylinositol-4-phosphate 5-kinase family protein	TraesCS5B01G358700	tpm	0	0	0	0	-	-	-	-	-	-
QTL_5B.3	TraesCS5B03G0902000	541850326	541852115	Phytoene synthase	TraesCS5B01G358800	tpm	1.03286	0	0.358882	0	-	-	-	-	-	-
QTL_5B.3	TraesCS5B03G0902200	541858171	541859509	Protein ELC	TraesCS5B01G358900	tpm	0	0	0	0	-	-	-	-	-	-
QTL_5B.3	TraesCS5B03G0902500	542066569	542071048	Ubiquitin-conjugating enzyme E2	TraesCS5B01G359000	tpm	0	0	0	0	-	-	-	-	-	-
QTL_5B.3	TraesCS5B03G0902800	542154064	542157638	Exosome complex component CSL4	TraesCS5B01G359100	tpm	3.19044	1.97914	2.56857	1.60744	2.27567	1.57146	2.84908	3.15562	2.42328	NC
QTL_5B.3	TraesCS5B03G0902900	542203980	542207280	Carboxyl-terminal-processing protease	TraesCS5B01G359200	tpm	0.0675083	1.79374	0	0	-	-	-	-	-	-
QTL_5B.3	TraesCS5B03G0903300	542378634	542380827	Acetyl-coenzyme A synthetase	TraesCS5B01G359300	tpm	0.524406	0	0	0	-	-	-	-	-	-
QTL_5B.3	TraesCS5B03G0903500	542416462	542420616	Signal peptidase subunit	TraesCS5B01G359400	tpm	4.95351	3.90546	4.2839	4.48566	5.57218	4.7038	4.41872	4.67665	4.37893	DR
QTL_5B.3	TraesCS5B03G0903700	542422157	542427183	Octicosapeptide/Phox/Bem1p domain-containing protein / tetratricopeptide repeat-containing protein	TraesCS5B01G359500	tpm	3.31172	1.82294	1.15459	0	-	-	-	-	-	-
QTL_5B.3	TraesCS5B03G0903800	542439934	542443185	ADP-L-glycero-D-manno-heptose-6-epimerase	TraesCS5B01G359600	tpm	0	0	0	0	-	-	-	-	-	-
QTL_5B.3	TraesCS5B03G0904100	542588202	542590493	Zinc finger protein hangover	TraesCS5B01G359700	tpm	6.50614	4.58166	5.77926	3.97015	4.26105	3.43733	3.32956	3.68805	3.3998	NC
QTL_5B.3	TraesCS5B03G0904200	542590599	542599410	Phosphate transporter	TraesCS5B01G359800	tpm	0	2.20133	0.726786	0	-	-	-	-	-	-
QTL_5B.3	TraesCS5B03G0904300	542599516	542604979	Cysteine--tRNA ligase	TraesCS5B01G359900	tpm	1.08065	1.70583	0	0	-	-	-	-	-	-
QTL_5B.4	TraesCS5B03G0916300	548005412	548009796	Mediator of DNA damage checkpoint protein 1	TraesCS5B01G366200	tpm	2.92032	2.4639	2.67472	1.61527	1.84538	1.43755	1.85115	1.8135	1.37387	NC
QTL_5B.4	TraesCS5B03G0916400	548009171	548012953	Regulator of chromosome condensation (RCC1) family protein	TraesCS5B01G366300	tpm	0.942045	0.276927	0.794416	0.359176	1.45071	0.66876	1.11902	1.38432	1.16315	NC
QTL_5B.4	TraesCS5B03G0918000	548373018	548375593	Receptor-like protein kinase	TraesCS5B01G366400	tpm	0	0	0	0	-	-	-	-	-	-
QTL_5B.4	TraesCS5B03G0918100	548492623	548497545	Zinc finger family protein	TraesCS5B01G366500	tpm	4.55171	3.95152	4.52001	3.50627	4.31609	4.00813	4.57448	4.68172	4.51158	NC
QTL_5B.4	TraesCS5B03G0918200	548498023	548500032	Carbohydrate-binding X8 domain superfamily protein, putative	TraesCS5B01G366600	tpm	0.473978	0	0	0	-	-	-	-	-	-
QTL_5B.4	TraesCS5B03G0918300	548500220	548503372	Molybdenum cofactor sulfurase protein-like	TraesCS5B01G366700	tpm	1.34858	2.39746	2.70596	1.50929	2.5008	1.22644	0.752378	0.129841	2.30411	NC
QTL_5B.4	TraesCS5B03G0918400	548521466	548524086	Molybdenum cofactor sulfurase protein-like	TraesCS5B01G366800	tpm	0	0.478139	0	4.75538	1.60959	2.59688	3.73605	4.64048	4.35998	UR
QTL_5B.4	TraesCS5B03G0918500	548668155	548670568	Receptor-like protein kinase	TraesCS5B01G366900	tpm	0	0.445922	0	0	-	-	-	-	-	-
QTL_5B.4	TraesCS5B03G0918700	548688442	548705260	Serine/threonine-protein kinase	TraesCS5B01G367000	tpm	0	0	0	0	-	-	-	-	-	-
QTL_5B.4	TraesCS5B03G0919000	548883024	548895504	Chromodomain-helicase-DNA-binding family protein	TraesCS5B01G367100	tpm	1.54905	0.638924	1.07164	0.428314	0.999876	0.481105	1.6324	1.60941	1.76493	NC
QTL_5B.4	TraesCS5B03G0919100	548910063	548912642	Receptor-like protein kinase	TraesCS5B01G367200	tpm	0	0	0	0	-	-	-	-	-	-
QTL_5B.5	TraesCS5B03G0921400	549406111	549414873	Receptor-like protein kinase	TraesCS5B01G367900	tpm	0	0	0	0	-	-	-	-	-	-
QTL_5B.5	TraesCS5B03G0921700	549574443	549577876	Protein kinase family protein	TraesCS5B01G368000	tpm	0	0	0	0	-	-	-	-	-	-
QTL_5B.5	TraesCS5B03G0921800	549606779	549610603	Subtilisin-like protease	TraesCS5B01G368100	tpm	0	0	0	0	-	-	-	-	-	-
QTL_5B.5	TraesCS5B03G0922200	549656178	549660821	Receptor-like protein kinase	TraesCS5B01G368200	tpm	0	0	0	0	-	-	-	-	-	-
QTL_5B.5	TraesCS5B03G0922400	549794241	549796264	Cysteine protease, putative	TraesCS5B01G368300	tpm	3.51461	2.35914	1.42173	0.90499	0	0	0	0	0	NC
QTL_5B.5	TraesCS5B03G0922900	549898595	549903271	Splicing factor u2af large subunit, putative	TraesCS5B01G368400	tpm	0	0	1.09706	0	-	-	-	-	-	-
QTL_5B.5	TraesCS5B03G0923200	549916320	549922092	Potassium transporter	TraesCS5B01G368500	tpm	0.871572	1.72285	1.86623	0.39977	0.461685	0	0.72796	0.158811	1.32987	NC
QTL_5B.5	TraesCS5B03G0923300	549935703	549958415	S-acyltransferase	TraesCS5B01G368600	tpm	3.68462	2.52552	3.23992	2.21492	2.83248	2.60978	3.22194	3.14916	2.80503	NC
QTL_5B.5	TraesCS5B03G0923400	549957084	549958025	S-acyltransferase	TraesCS5B01G368700	tpm	0	0	0	0	-	-	-	-	-	-
QTL_5B.5	TraesCS5B03G0922000	549621576	549626355	#N/A	#N/A	#N/A	#N/A	#N/A	#N/A	#N/A	-	-	-	-	-	-
QTL_5B.6	TraesCS5B03G0955200	562722212	562728407	Auxin canalization protein (DUF828)	TraesCS5B01G381200	tpm	0	1.8732	0.0365244	0	-	-	-	-	-	-
QTL_5B.6	TraesCS5B03G0955300	562940202	562944100	guanine nucleotide-binding protein subunit gamma	TraesCS5B01G381300	tpm	0.855535	0	0	0	-	-	-	-	-	-
QTL_5B.6	TraesCS5B03G0955400	562944674	562946492	Pentatricopeptide repeat-containing protein	TraesCS5B01G381400	tpm	0	0	0	0	-	-	-	-	-	-
QTL_5B.6	TraesCS5B03G0955900	563025272	563026865	Non-specific serine/threonine protein kinase	TraesCS5B01G381500	tpm	3.46689	0	0	0	-	-	-	-	-	-
QTL_5B.6	TraesCS5B03G0956000	563030256	563032263	Sec-independent protein translocase protein TatA	TraesCS5B01G381600	tpm	0	2.52417	0.218806	0.531109	2.54943	1.88127	2.0209	1.61943	1.95806	NC
QTL_5B.6	TraesCS5B03G0956100	563032461	563038160	Single-stranded DNA-binding protein	TraesCS5B01G381700	tpm	1.66556	3.80472	2.82594	1.91452	2.35257	2.06589	2.42735	2.45289	2.19452	NC
QTL_5B.6	TraesCS5B03G0956300	563040042	563040876	Auxin-responsive protein	TraesCS5B01G381800	tpm	4.10826	3.08995	0.653895	0	-	-	-	-	-	-
QTL_5B.6	TraesCS5B03G0956400	563252216	563254203	Auxin-responsive protein	TraesCS5B01G381900	tpm	0	1.40697	0	0	-	-	-	-	-	-
QTL_5B.6	TraesCS5B03G0956600	563255357	563262733	F-box/LRR-repeat protein 17	TraesCS5B01G382000	tpm	3.85377	3.09153	3.28617	1.53585	2.42522	2.07323	1.97362	2.12756	1.35261	DR
QTL_6B.1	TraesCS6B03G0921100	581568602	581572746	U-box domain-containing protein	TraesCS6B01G324000	tpm	6.35306	2.77697	3.22856	0.988681	2.27335	1.07649	0.358621	0.0769118	0	DR
QTL_6B.1	TraesCS6B03G0921700	581657275	581658729	3-ketoacyl-CoA synthase	TraesCS6B01G324200	tpm	0	0	0.209204	0	-	-	-	-	-	-
QTL_6B.1	TraesCS6B03G0921900	581924590	581926544	Jasmonate ZIM domain-containing protein	TraesCS6B01G324300	tpm	0	0	0	0	-	-	-	-	-	-
QTL_6B.1	TraesCS6B03G0922000	581931032	581933999	ADP-ribosylation factor, putative	TraesCS6B01G324400	tpm	4.53162	5.38017	5.54761	4.88827	5.06498	4.92105	5.28005	5.52466	5.22656	NC
QTL_6B.1	TraesCS6B03G0922300	582259467	582260785	Myb related transcription factor	TraesCS6B01G324600	tpm	0	0	0	0	-	-	-	-	-	-
QTL_6B.1	TraesCS6B03G0922400	582261683	582276232	Mediator of RNA polymerase II transcription subunit 23	TraesCS6B01G324700	tpm	4.22622	4.39027	4.94136	2.35076	3.62087	3.32726	3.67581	3.73869	3.56349	NC
QTL_6B.2	TraesCS6B03G1205700	708045570	708047603	signal recognition particle receptor alpha subunit family protein	TraesCS6B01G430700	tpm	0	2.30685	3.29605	5.11575	4.66985	4.46764	4.12405	4.50981	3.47675	DR
QTL_6B.2	TraesCS6B03G1206200	708211472	708214957	Serine/threonine-protein kinase	TraesCS6B01G430800	tpm	0	0	0	0	-	-	-	-	-	-
QTL_6B.2	TraesCS6B03G1206500	708223964	708227921	Serine/threonine-protein kinase	TraesCS6B01G430900	tpm	0	0	0	0	-	-	-	-	-	-
QTL_6B.2	TraesCS6B03G1206600	708240247	708246484	Acetyl-coenzyme A synthetase	TraesCS6B01G431000	tpm	6.17697	5.07797	5.01443	3.38749	4.14756	4.36078	4.61225	4.76394	4.80878	NC
QTL_6B.2	TraesCS6B03G1206700	708254593	708255462	Ethylene-responsive transcription factor	TraesCS6B01G431100	tpm	0	0	0	0	-	-	-	-	-	-
QTL_6B.2	TraesCS6B03G1206800	708256992	708258122	Major facilitator superfamily protein	TraesCS6B01G431200	tpm	0	0	0	0	-	-	-	-	-	-
QTL_6B.2	TraesCS6B03G1206900	708264316	708267523	Receptor-like kinase	TraesCS6B01G431300	tpm	0	0	0	0	-	-	-	-	-	-
QTL_6B.2	TraesCS6B03G1207200	708422475	708436062	Myosin	TraesCS6B01G431400	tpm	5.07256	4.00928	4.04404	0.891761	3.10431	3.09593	3.12285	3.23289	3.70748	NC
QTL_6B.2	TraesCS6B03G1207300	708437256	708442632	Transcription factor	TraesCS6B01G431500	tpm	2.74898	2.33093	3.0528	2.50374	2.94694	2.77453	1.95971	1.64433	1.52904	DR
QTL_6D.1	TraesCS6D03G0005600	959215	959478	GRF zinc finger family protein	TraesCS6D01G001900	tpm	0	0	0	0	-	-	-	-	-	-
QTL_6D.1	TraesCS6D03G0006700	1060930	1063103	UDP-Glycosyltransferase superfamily protein	TraesCS6D01G002000	tpm	3.01507	3.21637	4.23775	4.09844	3.86164	3.24977	2.73083	2.68306	2.25079	DR
QTL_6D.1	TraesCS6D03G0006800	1364800	1366449	F-box family protein	TraesCS6D01G002100	tpm	0	0	0	0	-	-	-	-	-	-
QTL_6D.1	TraesCS6D03G0007000	1403764	1407970	Receptor-kinase, putative	TraesCS6D01G002200	tpm	0	0.649188	0	0	-	-	-	-	-	-
QTL_6D.1	TraesCS6D03G0007300	1436172	1441156	Receptor-like protein kinase	TraesCS6D01G002300	tpm	1.1182	0	0.98297	0	-	-	-	-	-	-
QTL_6D.1	TraesCS6D03G0007500	1479620	1482804	Protein kinase family protein	TraesCS6D01G002400	tpm	0	0	0	0	-	-	-	-	-	-
QTL_6D.1	TraesCS6D03G0007600	1498848	1508542	Protein kinase family protein	TraesCS6D01G002500	tpm	0	0	0	0	-	-	-	-	-	-
QTL_6D.1	TraesCS6D03G0007800	1529313	1530649	SKP1-like protein	TraesCS6D01G002600	tpm	0	0	0	2.59981	2.04176	0.520334	0.498707	0.28148	0	DR
QTL_6D.1	TraesCS6D03G0008200	1562254	1562682	Disintegrin and metalloproteinase domain-containing protein 17	TraesCS6D01G002700	tpm	0	0	0	0	-	-	-	-	-	-
QTL_6D.1	TraesCS6D03G0008300	1576200	1578916	GDSL esterase/lipase	TraesCS6D01G002800	tpm	0	0.559502	0	0	-	-	-	-	-	-
QTL_6D.1	TraesCS6D03G0008600	1617253	1618208	RNA-binding (RRM/RBD/RNP motifs) family protein	TraesCS6D01G002900	tpm	0	0	0	0	-	-	-	-	-	-
QTL_6D.1	TraesCS6D03G0008700	1625389	1626300	RNA-binding (RRM/RBD/RNP motifs) family protein	TraesCS6D01G003000	tpm	0	0	0	0	-	-	-	-	-	-
QTL_6D.1	TraesCS6D03G0008900	1750151	1751236	2-oxoglutarate (2OG) and Fe(II)-dependent oxygenase superfamily protein	TraesCS6D01G003100	tpm	0	0	0	0	-	-	-	-	-	-
QTL_6D.1	TraesCS6D03G0009000	1759389	1764048	Amino acid transporter	TraesCS6D01G003200	tpm	4.99551	5.44678	3.33226	0	-	-	-	-	-	-
QTL_6D.1	TraesCS6D03G0009100	1769252	1772936	Translation initiation factor IF-3	TraesCS6D01G003300	tpm	3.07599	2.80346	2.1956	1.60566	2.58712	2.12498	2.40652	2.5307	2.28298	NC
QTL_6D.1	TraesCS6D03G0009200	1787907	1788841	2-oxoglutarate (2OG) and Fe(II)-dependent oxygenase superfamily protein	TraesCS6D01G003400	tpm	0	0	0	0	-	-	-	-	-	-
QTL_6D.1	TraesCS6D03G0009700	1889545	1890474	2-oxoglutarate (2OG) and Fe(II)-dependent oxygenase superfamily protein	TraesCS6D01G003500	tpm	0	0	0	0	-	-	-	-	-	-
QTL_6D.1	TraesCS6D03G0007200	1411704	1421963	#N/A	#N/A	#N/A	#N/A	#N/A	#N/A	#N/A	-	-	-	-	-	-
QTL_6D.2	TraesCS6D03G0305900	126963098	126965546	Chorismate mutase	TraesCS6D01G136700	tpm	3.56091	3.65297	3.00582	1.31694	2.30278	2.25737	2.47113	0.133802	0	DR
QTL_6D.2	TraesCS6D03G0306200	126970922	126979771	Ubiquitin, putative	TraesCS6D01G136800	tpm	0	0	0	0	-	-	-	-	-	-
QTL_6D.2	TraesCS6D03G0306300	126983369	126985396	N-acetyltransferase, putative	TraesCS6D01G136900	tpm	0	0	0	0	-	-	-	-	-	-
QTL_6D.2	TraesCS6D03G0306400	127000173	127006590	Nucleoid-associated protein	TraesCS6D01G137000	tpm	3.77105	6.02318	4.75054	4.11566	4.69262	3.87219	4.08837	4.09196	4.65671	NC
QTL_6D.2	TraesCS6D03G0306700	127243041	127245907	Ubiquitin carboxyl-terminal hydrolase	TraesCS6D01G137100	tpm	3.59919	3.1335	3.54546	3.52748	3.76403	2.96791	2.55148	2.35834	2.05103	DR
QTL_6D.2	TraesCS6D03G0306800	127246078	127251340	Protein phosphatase 2c, putative	TraesCS6D01G137200	tpm	5.71236	4.86983	4.91408	0.610234	1.13045	1.70916	2.16654	2.78567	2.98485	UR
QTL_6D.3	TraesCS6D03G0843100	475951296	475956915	Cytosine-specific methyltransferase	TraesCS6D01G364900	tpm	5.40998	3.59756	3.44841	1.5487	3.85272	2.10605	0	0	0	DR
QTL_6D.3	TraesCS6D03G0843200	475957479	475962193	Zinc finger, PHD-finger	TraesCS6D01G365000	tpm	0.787781	0.789269	1.18187	0	-	-	-	-	-	-
QTL_6D.3	TraesCS6D03G0843500	476057838	476060438	NBS-LRR disease resistance protein	TraesCS6D01G365100	tpm	0	2.64952	4.93078	1.33477	2.63451	1.05337	0	0	0	DR
QTL_6D.3	TraesCS6D03G0843700	476103501	476105532	Octicosapeptide/Phox/Bem1p domain-containing protein	TraesCS6D01G365200	tpm	3.80045	1.6863	2.02169	1.19693	3.96918	3.08396	2.29368	2.37431	0	DR
QTL_6D.3	TraesCS6D03G0843800	476111961	476112818	Ulp1 protease family, C-terminal catalytic domain containing protein	TraesCS6D01G365300	tpm	3.20826	2.12026	3.94276	1.72062	3.46396	2.67096	2.34595	2.23244	0.956267	DR
QTL_6D.3	TraesCS6D03G0843900	476117180	476119096	Cytochrome P450	TraesCS6D01G365400	tpm	0	1.99718	0	2.01241	2.79086	1.13991	0.776873	0	0	DR
QTL_6D.3	TraesCS6D03G0844000	476122891	476125151	P-loop containing nucleoside triphosphate hydrolases superfamily protein	TraesCS6D01G365500	tpm	0	0	0	0	-	-	-	-	-	-
QTL_6D.3	TraesCS6D03G0844100	476123500	476125353	Cytochrome P450	TraesCS6D01G365600	tpm	0	0.320869	0	0	-	-	-	-	-	-
QTL_6D.3	TraesCS6D03G0844200	476126978	476128720	Cinnamoyl CoA reductase	TraesCS6D01G365700	tpm	1.38689	0	0	0.231899	0.913343	1.53367	2.46543	3.12829	0	NC
QTL_6D.3	TraesCS6D03G0844700	476155937	476156674	CRT-binding factor	TraesCS6D01G365800	tpm	0	0	0	0	-	-	-	-	-	-
QTL_6D.3	TraesCS6D03G0844800	476203480	476205038	Cinnamoyl CoA reductase	TraesCS6D01G365900	tpm	0	0	0	0	-	-	-	-	-	-
QTL_6D.3	TraesCS6D03G0844900	476217019	476218401	Cinnamoyl CoA reductase	TraesCS6D01G366000	tpm	0	0	0	0	-	-	-	-	-	-
QTL_6D.3	TraesCS6D03G0845000	476267877	476269050	CRT-binding factor	TraesCS6D01G366100	tpm	0	0	0	0	-	-	-	-	-	-
QTL_6D.3	TraesCS6D03G0845100	476293998	476295879	Cinnamoyl CoA reductase	TraesCS6D01G366200	tpm	0	0	0	0	-	-	-	-	-	-
QTL_6D.3	TraesCS6D03G0845300	476393892	476395164	Cinnamoyl CoA reductase	TraesCS6D01G366400	tpm	0	0	0	0	-	-	-	-	-	-
QTL_6D.3	TraesCS6D03G0845400	476398948	476406411	Translation initiation factor eIF-2B subunit epsilon	TraesCS6D01G366500	tpm	3.87408	3.85251	3.27504	2.73413	3.29288	2.52011	3.4546	3.67205	3.37695	NC
QTL_6D.3	TraesCS6D03G0845500	476407751	476409658	F-box protein PP2	TraesCS6D01G366600	tpm	0	0	0	0	-	-	-	-	-	-
QTL_6D.3	TraesCS6D03G0845600	476430268	476430995	Germin-like protein 1-1	TraesCS6D01G366700	tpm	0	0	0	0	-	-	-	-	-	-
QTL_6D.3	TraesCS6D03G0846100	476435535	476436262	Germin-like protein 1-1	TraesCS6D01G366900	tpm	0	0	0	0	-	-	-	-	-	-
QTL_6D.3	TraesCS6D03G0846300	476463787	476465094	Germin-like protein 1-1	TraesCS6D01G367000	tpm	5.98109	1.8844	0	0	-	-	-	-	-	-
QTL_6D.3	TraesCS6D03G0847100	476552362	476553969	U-box domain-containing family protein	TraesCS6D01G367100	tpm	1.10727	0	0	0	-	-	-	-	-	-
QTL_6D.3	TraesCS6D03G0847200	476565904	476567983	Bidirectional sugar transporter SWEET	TraesCS6D01G367200	tpm	1.56884	6.18956	3.28845	0.894876	0	0	0	0	0	NC
QTL_6D.3	TraesCS6D03G0847600	476601595	476603802	Bidirectional sugar transporter SWEET	TraesCS6D01G367300	tpm	0	5.82165	1.53275	0.151365	0	0	0	0	0	NC
QTL_6D.3	TraesCS6D03G0847700	476718075	476720114	Bidirectional sugar transporter SWEET	TraesCS6D01G367400	tpm	1.57224	8.2218	2.39839	0.767163	0	0	0	0	0.076217	NC
QTL_6D.3	TraesCS6D03G0848000	476772164	476773064	F-box protein PP2	TraesCS6D01G367500	tpm	0	0	0	0	-	-	-	-	-	-
QTL_6D.3	TraesCS6D03G0848100	476777383	476778977	U-box domain-containing family protein	TraesCS6D01G367600	tpm	2.51189	0	0	0	-	-	-	-	-	-
QTL_6D.3	TraesCS6D03G0848200	476886496	476887587	Germin-like protein 1-1	TraesCS6D01G367700	tpm	6.39993	2.65105	0	0	-	-	-	-	-	-
QTL_6D.3	TraesCS6D03G0848300	476889775	476891159	Germin-like protein 1-1	TraesCS6D01G367800	tpm	4.15598	0.0495285	0	0	-	-	-	-	-	-
QTL_6D.3	TraesCS6D03G0848400	476899773	476903770	F-box protein PP2	TraesCS6D01G367900	tpm	0	0	0	0	-	-	-	-	-	-
QTL_7A.1	N/A	N/A	N/A	N/A	N/A	N/A	N/A	N/A	N/A	N/A	-	-	-	-	-	-
QTL_7A.1	N/A	N/A	N/A	N/A	N/A	N/A	N/A	N/A	N/A	N/A	-	-	-	-	-	-
QTL_7A.2	TraesCS7A03G0409200	131682760	131685566	transmembrane protein, putative (DUF594)	TraesCS7A01G174000	tpm	0	0	0	0	-	-	-	-	-	-
QTL_7A.2	TraesCS7A03G0409300	131782411	131784593	Aspartic proteinase nepenthesin-2	TraesCS7A01G174100	tpm	0	0	0.350237	0	-	-	-	-	-	-
QTL_7A.2	TraesCS7A03G0409500	131787982	131788772	Harpin inducing protein	TraesCS7A01G174200	tpm	0	0	0	0	-	-	-	-	-	-
QTL_7A.2	TraesCS7A03G0409900	131933352	131934766	Alpha/beta-Hydrolases superfamily protein	TraesCS7A01G174300	tpm	0	0	0	0	-	-	-	-	-	-
QTL_7A.2	TraesCS7A03G0410200	132025946	132026922	Disease resistance protein (TIR-NBS-LRR class) family	TraesCS7A01G174400	tpm	0	0	0	0	-	-	-	-	-	-
QTL_7A.2	TraesCS7A03G0410400	132037611	132038925	12-oxophytodienoate reductase-like protein	TraesCS7A01G174500	tpm	0	0	1.04375	0	-	-	-	-	-	-
QTL_7A.2	TraesCS7A03G0410900	132141737	132143419	12-oxophytodienoate reductase-like protein	TraesCS7A01G174700	tpm	6.86215	1.02856	0	0	-	-	-	-	-	-
QTL_7A.2	TraesCS7A03G0411000	132144752	132146155	Pentatricopeptide repeat-containing protein	TraesCS7A01G174800	tpm	0	0	0	0	-	-	-	-	-	-
QTL_7A.2	TraesCS7A03G0412500	132687277	132688585	SNW domain-containing protein 1	TraesCS7A01G176000	tpm	0	0	0	0	-	-	-	-	-	-
QTL_7A.2	TraesCS7A03G0412600	132688878	132690801	KAT8 regulatory NSL complex subunit 3	TraesCS7A01G176100	tpm	2.67903	2.23076	2.99217	2.34712	2.31887	1.92874	1.74604	1.64201	0.678453	DR
QTL_7A.2	TraesCS7A03G0413100	132886444	132890382	Transport inhibitor response 1-like protein	TraesCS7A01G176200	tpm	4.7718	3.03436	3.3825	2.39799	2.14301	1.93319	2.17489	2.09029	1.56739	NC
QTL_7A.2	TraesCS7A03G0411400	132457431	132464217	MADS box transcription factor	TraesCS7A01G175200	tpm	0.45367	3.82468	0	0	-	-	-	-	-	-
QTL_7A.2	TraesCS7A03G0411700	132525849	132531969	Peptidyl-prolyl cis-trans isomerase	TraesCS7A01G175300	tpm	3.87333	3.66745	2.06953	2.03162	2.21682	1.45241	2.29178	2.73818	2.70467	NC
QTL_7A.2	TraesCS7A03G0411800	132541927	132543485	Blue copper protein	TraesCS7A01G175400	tpm	3.3822	2.23269	0	0	-	-	-	-	-	-
QTL_7A.2	TraesCS7A03G0411900	132543490	132545593	Pentatricopeptide repeat-containing protein	TraesCS7A01G175500	tpm	0.322274	0.946027	1.38167	0	-	-	-	-	-	-
QTL_7A.2	TraesCS7A03G0412000	132547419	132548030	4-hydroxy-3-methylbut-2-en-1-yl diphosphate synthase (flavodoxin)	TraesCS7A01G175600	tpm	2.27046	0	3.17628	0	-	-	-	-	-	-
QTL_7A.2	TraesCS7A03G0412300	132555497	132557880	Protein curvature thylakoid chloroplastic-like	TraesCS7A01G175800	tpm	0	0	0	6.02839	6.68493	4.54942	0	0	0	DR
QTL_7A.2	TraesCS7A03G0412400	132598643	132602442	Protein SPA1-RELATED 3	TraesCS7A01G175900	tpm	1.4806	1.57387	3.17034	0	-	-	-	-	-	-
QTL_7A.2	TraesCS7A03G0416100	135439820	135443919	Polyadenylate-binding protein family protein	TraesCS7A01G177900	tpm	4.43493	4.63262	4.15237	4.05313	4.32891	3.81166	4.23358	4.07817	4.22091	NC
QTL_7A.2	TraesCS7A03G0416300	135459873	135463577	F-box protein-like	TraesCS7A01G178000	tpm	1.54241	1.83736	2.10066	2.71276	2.83385	2.60656	2.10568	2.07135	2.14613	NC
QTL_7A.2	TraesCS7A03G0416500	135491787	135493288	Serine/threonine-protein phosphatase 2A activator	TraesCS7A01G178100	tpm	1.07976	1.71458	0.356617	0.14419	1.35868	1.00325	1.27814	1.14728	1.78152	NC
QTL_7A.2	TraesCS7A03G0416600	135496009	135497335	Protein EXORDIUM-like 1	TraesCS7A01G178200	tpm	0	0	0	0	-	-	-	-	-	-
QTL_7A.2	TraesCS7A03G0416700	135563753	135564391	Germin-like protein	TraesCS7A01G178300	tpm	0	6.60022	1.43182	0	-	-	-	-	-	-
QTL_7A.3	TraesCS7A03G1342600	731790262	731792195	High mobility group protein	TraesCS7A01G552400	tpm	6.70704	7.575	7.21667	8.01039	7.68146	6.55151	7.19207	7.22599	5.50572	DR
QTL_7A.3	TraesCS7A03G1342700	731797745	731799008	Phosphatidylinositol N-acetyglucosaminlytransferase subunit P-like protein	TraesCS7A01G552500	tpm	0	0	0	0	-	-	-	-	-	-
QTL_7A.3	TraesCS7A03G1342900	731812183	731818400	Copalyl diphosphate synthase-like protein	TraesCS7A01G552600	tpm	0.0713645	0.599095	1.09798	1.61037	1.53061	2.42484	2.09576	2.13058	2.20818	NC
QTL_7A.3	TraesCS7A03G1343500	731906661	731912612	Copalyl diphosphate synthase-like protein	TraesCS7A01G552700	tpm	0	0	0.972244	0	-	-	-	-	-	-
QTL_7A.3	TraesCS7A03G1343700	731966505	731967905	BURP domain protein RD22	TraesCS7A01G552800	tpm	0	0	0	0	-	-	-	-	-	-
QTL_7A.3	TraesCS7A03G1344600	732071706	732073127	F-box protein	TraesCS7A01G552900	tpm	0	0	0	0	-	-	-	-	-	-
QTL_7A.3	TraesCS7A03G1345700	732261656	732267520	Aquaporin	TraesCS7A01G553000	tpm	3.05466	0	0	0	-	-	-	-	-	-
QTL_7A.3	TraesCS7A03G1346100	732278798	732287778	Calcium-binding EF hand protein-like	TraesCS7A01G553100	tpm	4.91968	5.08706	5.49989	2.83861	4.0593	3.60832	3.84127	3.73548	3.6565	NC
QTL_7A.3	TraesCS7A03G1346300	732350757	732353439	Kinesin-like	TraesCS7A01G553200	tpm	0	0	0	0	-	-	-	-	-	-
QTL_7B.1	TraesCS2D03G1232600	631230574	631230705	Protein PsbN	TraesCS7B01G046500	tpm	0	0	0	0	-	-	-	-	-	-
QTL_7B.1	TraesCS7B03G0977700	631197229	631202409	Zinc finger CCCH domain-containing protein 45	TraesCS7B01G363200	tpm	1.62824	1.91768	1.55231	2.12599	2.48942	1.99114	1.95606	1.99127	2.40973	NC
QTL_7B.1	TraesCS7B03G0978300	631462573	631462941	Tripartite motif-containing protein 5	TraesCS7B01G363300	tpm	0	0	0	0	-	-	-	-	-	-
QTL_7B.1	TraesCS7B03G0978600	631543389	631546851	Leucine-rich repeat receptor-like protein kinase family protein	TraesCS7B01G363500	tpm	0	0	0	0	-	-	-	-	-	-
QTL_7B.1	TraesCS7B03G0978800	631548093	631552321	Geranylgeranyl transferase type-2 subunit alpha 1	TraesCS7B01G363600	tpm	4.7328	4.64222	4.8112	3.16869	3.6462	2.94201	4.22484	4.29341	3.68889	NC
QTL_7B.1	TraesCS7B03G0978900	631591133	631594376	3-hydroxyisobutyrate dehydrogenase	TraesCS7B01G363700	tpm	2.81431	2.94087	2.94296	3.72591	3.26668	3.25681	2.75101	2.2032	1.79317	DR
QTL_7B.1	TraesCS7B03G0979000	631661856	631663156	Alpha/beta-Hydrolases superfamily protein	TraesCS7B01G363800	tpm	0	0	0	0	-	-	-	-	-	-
QTL_7B.1	TraesCS7B03G0979200	631717779	631722255	RING/U-box superfamily protein	TraesCS7B01G363900	tpm	2.07358	2.47156	4.02629	2.01083	2.18738	1.61806	2.39489	1.78732	2.46338	NC
QTL_7B.1	TraesCS7B03G0979500	632039560	632044190	B3 domain-containing protein	TraesCS7B01G364000	tpm	0	0	0	0	-	-	-	-	-	-
QTL_7B.2	TraesCS7B03G1279500	744228352	744230441	Flavin-containing monooxygenase	TraesCS7B01G476100	tpm	0	0	0	0	-	-	-	-	-	-
QTL_7B.2	TraesCS7B03G1280000	744271123	744271837	Disease resistance protein (TIR-NBS-LRR class) family	TraesCS7B01G476200	tpm	0	0	0	0	-	-	-	-	-	-
QTL_7B.2	TraesCS7B03G1280400	744364766	744370535	ATP-dependent 6-phosphofructokinase	TraesCS7B01G476300	tpm	1.10187	1.25794	3.75587	0.0673909	1.598	1.23857	2.27267	2.21348	1.73946	NC
QTL_7B.2	TraesCS7B03G1281000	744413281	744419166	Copalyl diphosphate synthase-like protein	TraesCS7B01G476400	tpm	1.22637	1.23583	2.54202	0.273898	0	0	0	0	0	NC
QTL_7B.2	TraesCS7B03G1281700	744437146	744437982	Disease resistance protein (TIR-NBS-LRR class) family	TraesCS7B01G476600	tpm	0	0	0	0	-	-	-	-	-	-
QTL_7B.2	TraesCS7B03G1282300	744490335	744493322	Aquaporin	TraesCS7B01G476700	tpm	0.731444	0	0	0	-	-	-	-	-	-
QTL_7B.2	TraesCS7B03G1282500	744495927	744504919	Calcium-binding EF hand protein-like	TraesCS7B01G476800	tpm	4.69512	4.89079	5.12906	2.55306	3.3704	3.00202	3.38231	3.18069	3.37158	NC
QTL_7B.2	TraesCS7B03G1283000	744719555	744720013	disease resistance protein (TIR-NBS class)	TraesCS7B01G476900	tpm	0	0	0	0	-	-	-	-	-	-
QTL_7B.2	TraesCS7B03G1283100	744744669	744745127	disease resistance protein (TIR-NBS class)	TraesCS7B01G477000	tpm	0	0	0	0	-	-	-	-	-	-
QTL_7B.2	TraesCS7B03G1283500	744927198	744929603	Disease resistance protein (TIR-NBS-LRR class) family	TraesCS7B01G477100	tpm	0	0	0	0	-	-	-	-	-	-
QTL_7B.2	TraesCS7B03G1283800	744987932	744989715	Disease resistance protein (NBS-LRR class) family	TraesCS7B01G477200	tpm	0	0	0	0	-	-	-	-	-	-
QTL_7D.1	TraesCS7D03G1082900	576995339	576996289	SAUR-like auxin-responsive protein family	TraesCS7D01G456100	tpm	0	0	0.449746	0	-	-	-	-	-	-
QTL_7D.1	TraesCS7D03G1083100	577045339	577045977	SAUR-like auxin-responsive family protein	TraesCS7D01G456200	tpm	0	0	0	0	-	-	-	-	-	-
QTL_7D.1	TraesCS7D03G1083500	577193540	577193941	SAUR-like auxin-responsive protein family	TraesCS7D01G456300	tpm	0	0	0	0	-	-	-	-	-	-
QTL_7D.1	TraesCS7D03G1083600	577268110	577268529	SAUR-like auxin-responsive protein family	TraesCS7D01G456400	tpm	0	0	0	0	-	-	-	-	-	-
QTL_7D.1	TraesCS7D03G1084000	577335155	577335574	SAUR-like auxin-responsive protein family	TraesCS7D01G456500	tpm	0	0	0	0	-	-	-	-	-	-
QTL_7D.1	TraesCS7D03G1084200	577477856	577479198	30S ribosomal protein S13	TraesCS7D01G456600	tpm	3.87607	4.02432	3.28979	3.95846	4.29534	3.39642	4.52147	4.73331	3.89136	NC
QTL_7D.1	TraesCS7D03G1084300	577520368	577520658	SAUR-like auxin-responsive protein family	TraesCS7D01G456700	tpm	0	0	0	0	-	-	-	-	-	-
QTL_7D.1	TraesCS7D03G1084400	577553176	577553463	SAUR-like auxin-responsive protein family	TraesCS7D01G456800	tpm	0	0	0	0	-	-	-	-	-	-
QTL_7D.1	TraesCS7D03G1084500	577612218	577621092	Potassium transporter	TraesCS7D01G456900	tpm	0	0	0	0	-	-	-	-	-	-
QTL_7D.1	TraesCS7D03G1084600	577645896	577647163	Ring finger protein, putative	TraesCS7D01G457000	tpm	0	0	0	0	-	-	-	-	-	-
QTL_7D.1	TraesCS7D03G1084800	577703174	577706970	Protein kinase family protein	TraesCS7D01G457100	tpm	0	0	0	0	-	-	-	-	-	-
QTL_7D.1	TraesCS7D03G1085300	577787859	577793951	Peptidyl-prolyl cis-trans isomerase-like protein	TraesCS7D01G457200	tpm	2.90493	2.64607	2.51209	2.01356	2.41931	2.07773	3.5265	3.89193	4.18411	UR
QTL_7D.1	TraesCS7D03G1085400	577798240	577800331	Homeodomain-like superfamily protein	TraesCS7D01G457300	tpm	0	0	0	0	-	-	-	-	-	-
QTL_7D.1	TraesCS7D03G1085500	577848305	577850868	Homeodomain-like superfamily protein	TraesCS7D01G457400	tpm	0	0	0	0	-	-	-	-	-	-
QTL_7D.1	TraesCS7D03G1085700	577879309	577881486	Homeodomain-like superfamily protein	TraesCS7D01G457500	tpm	0	0	0	0	-	-	-	-	-	-
QTL_7D.1	TraesCS7D03G1085800	577925249	577927747	Homeodomain-like superfamily protein	TraesCS7D01G457600	tpm	0	0	0	0	-	-	-	-	-	-
QTL_7D.1	TraesCS7D03G1085900	577967243	577970998	Aspartyl/glutamyl-tRNA(Asn/Gln) amidotransferase subunit B, putative isoform 2	TraesCS7D01G457700	tpm	2.128	0.504092	0	0	-	-	-	-	-	-
QTL_7D.1	TraesCS7D03G1086000	577971349	577977433	Molybdenum cofactor sulfurase	TraesCS7D01G457800	tpm	3.14889	2.51576	2.27726	0.00804221	0.813471	1.26662	3.08077	3.18009	4.46059	UR
QTL_7D.1	TraesCS7D03G1086300	578030739	578035182	Receptor kinase	TraesCS7D01G457900	tpm	0	0	0.297438	0	-	-	-	-	-	-
QTL_7D.1	TraesCS7D03G1086600	578051507	578060640	MYB-related transcription factor	TraesCS7D01G458000	tpm	2.97095	3.73366	3.80778	3.94205	3.4919	3.46262	3.1431	3.18811	3.58136	NC
QTL_7D.1	TraesCS7D03G1086900	578161022	578161594	Exocyst complex component, putative	TraesCS7D01G458100	tpm	0	0	0	0	-	-	-	-	-	-
QTL_7D.1	TraesCS7D03G1087500	578277418	578281397	OTU domain-containing protein	TraesCS7D01G458200	tpm	3.90708	4.22629	3.75744	2.33864	2.95119	2.32978	2.52668	2.33878	2.18871	NC
QTL_7D.1	TraesCS7D03G1087700	578297175	578303085	Embryo yellow protein	TraesCS7D01G458300	tpm	4.47987	4.09521	4.58618	2.99573	3.87295	3.11734	3.78455	3.7861	3.94889	NC
QTL_7D.1	TraesCS7D03G1087900	578385078	578389063	ATP-dependent zinc metalloprotease FTSH protein	TraesCS7D01G458400	tpm	2.81766	6.73937	5.4682	4.14494	5.09015	4.51519	4.48823	3.40415	4.01466	DR
QTL_7D.1	TraesCS7D03G1088100	578392719	578403464	Non-canonical poly(A) RNA polymerase PAPD7	TraesCS7D01G458500	tpm	2.35744	1.33503	2.29884	0	-	-	-	-	-	-
QTL_7D.1	TraesCS7D03G1088200	578405580	578407061	BTB/POZ domain containing protein, expressed	TraesCS7D01G458600	tpm	1.22768	1.50703	1.95612	2.14947	2.53984	1.97439	2.058	2.24327	1.53506	DR
QTL_7D.1	TraesCS7D03G1088500	578435438	578438394	Pentatricopeptide repeat-containing protein	TraesCS7D01G458700	tpm	0	0	0	0	-	-	-	-	-	-
QTL_7D.1	TraesCS7D03G1088600	578439038	578441895	Argonaute	TraesCS7D01G458800	tpm	0	0	0	0	-	-	-	-	-	-
QTL_7D.1	TraesCS7D03G1088700	578443001	578443902	Argonaute	TraesCS7D01G458900	tpm	0	0	0	0	-	-	-	-	-	-
Hotspot- WTL hospot name, Gene ID- gene ID V2.1; Start- gene starting position in bp; Stop- Gene stop position in bp; Description- General description of the gene; RNA expression level in the tissues (roots, leaves and shoots, spikes, grains) in Transcripts Per Million (TPM) , N/A- No candidate genes were located in the region of ±500 kb MTAs within the QTL hotspots, Reg- up regulation and down r…
